# Supplementary material
Source: PubMed Central journal article supplement (PMC6288115)

# ABC model fit and posterior distributions

Supplementary File 3 for Carroll et al., Incorporating non-equilibrium situations into demographic history inferences of a migratory marine species

For each scenario, the following plots are displayed for each estimated parameter:

1. Top left: a density plot of the prior distribution
2. Bottom left: a density plot of the posterior distribution For the density plot of the posterior distribution, values estimated with the non-linear regression correction method or 'neural net' (red thick lines) and, for reference, using the simple rejection method (black fine lines) are displayed. The prior distribution (in the posterior distributions' range) is also displayed (dashed lines). For the scatter plot Euclidean
3. Top right: a scatter plot of the Euclidean distances as a function of the parameter values
4. Bottom right: Normal Q-Q plot of the residuals from the regression. Points corresponding to the accepted simulations are displayed in red.

Scenario 1: random lineage sorting with  
continuous gene flow and a single migration rate

$M_H$

### Prior

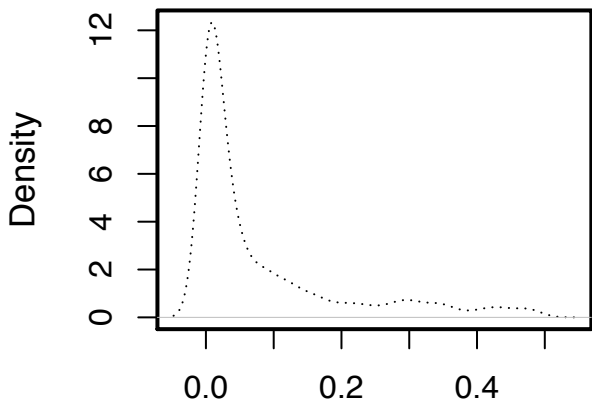

MIGR1\_2

N = 1000 Bandwidth = 0.01627

### Euclidean distances

N(All / plotted) = 1e+05 / 1000

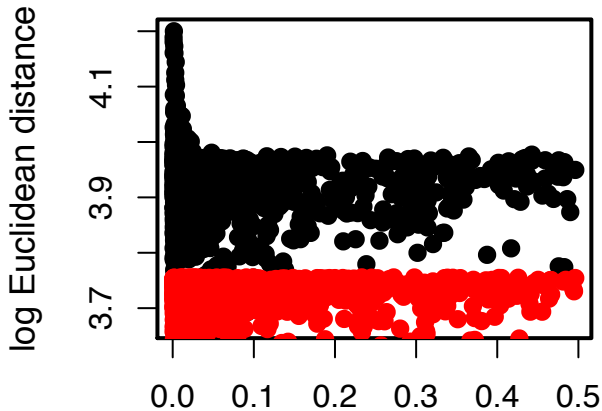

MIGR1\_2

### Posterior with "neuralnet"

"rejection" and prior as reference

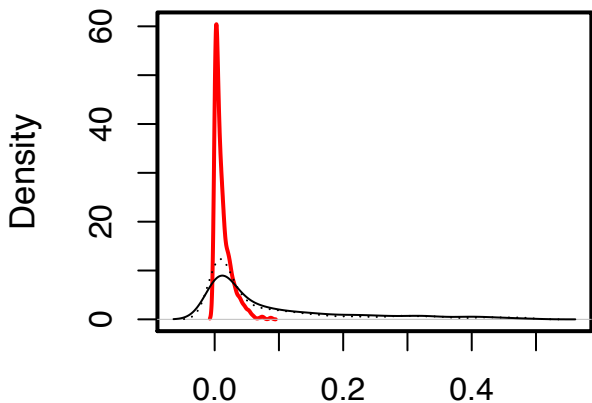

MIGR1\_2

N = 1000 Bandwidth = 0.00256

### Residuals from nnet()

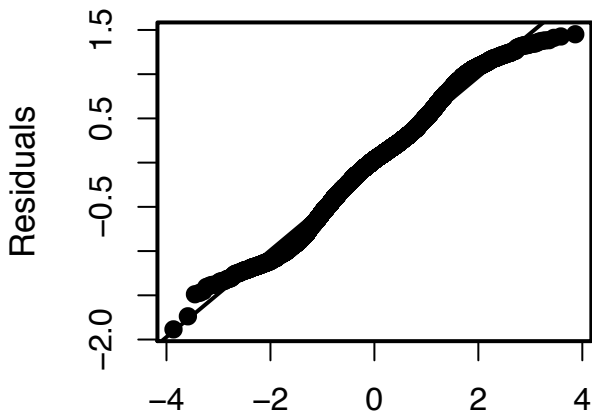

Theoretical quantiles

Normal Q-Q plot

### Prior

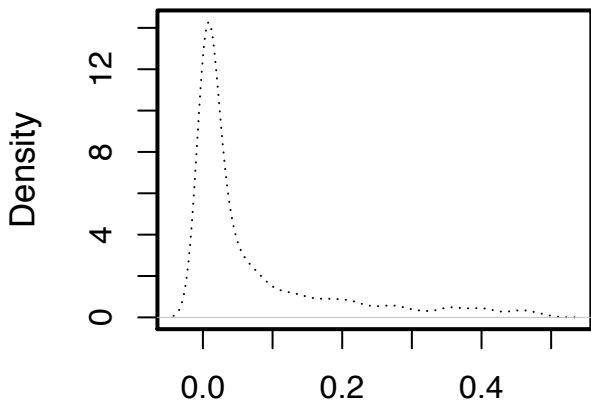

MIGR2\_1

N = 1000 Bandwidth = 0.01441

### Euclidean distances

N(All / plotted) = 1e+05 / 1000

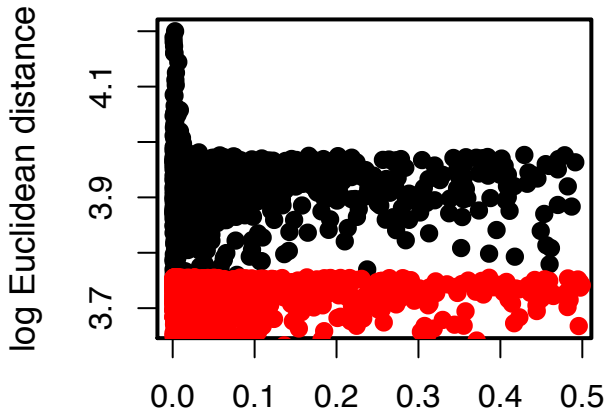

MIGR2\_1

### Posterior with "neuralnet"

"rejection" and prior as reference

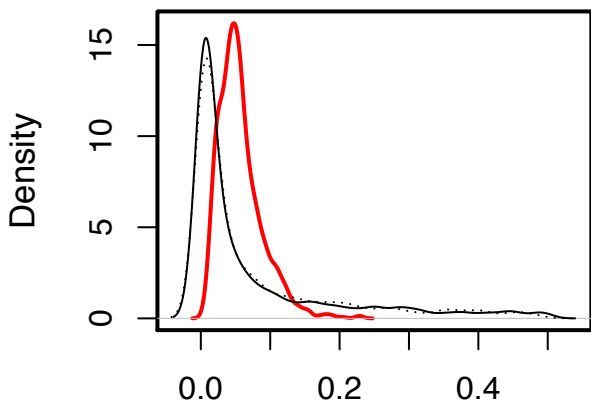

MIGR2\_1

N = 1000 Bandwidth = 0.005943

### Residuals from nnet()

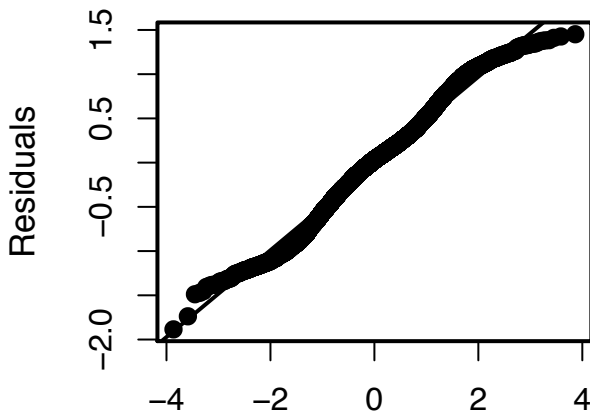

Theoretical quantiles

Normal Q-Q plot



### Prior

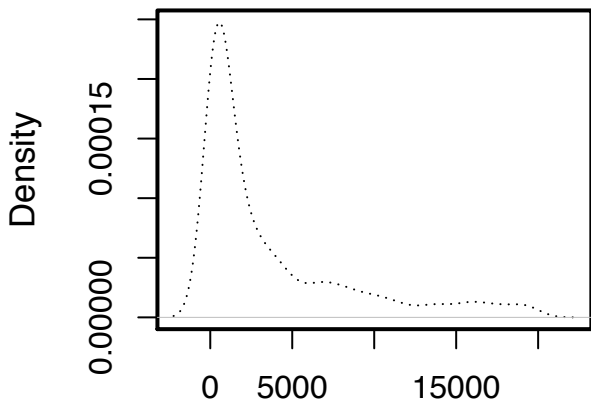

POP\_SIZE1MS  
N = 1000 Bandwidth = 781

### Euclidean distances

N(All / plotted) = 1e+05 / 1000

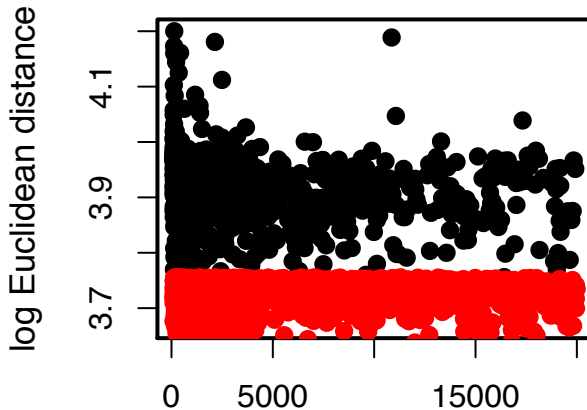

POP\_SIZE1MS

### Posterior with "neuralnet"

"rejection" and prior as reference

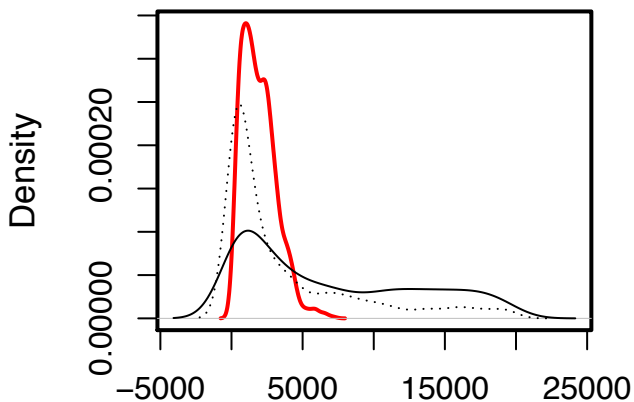

POP\_SIZE1MS  
N = 1000 Bandwidth = 272.6

### Residuals from nnet()

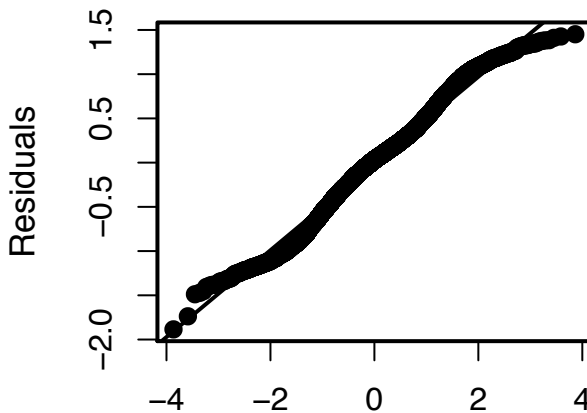

Theoretical quantiles  
Normal Q-Q plot

### Prior

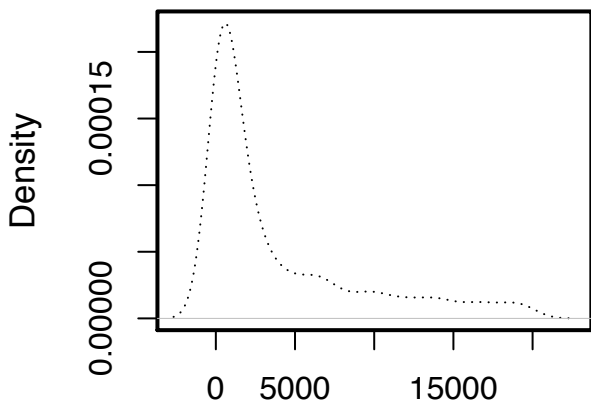

POP\_SIZE2MS

N = 1000 Bandwidth = 923.9

### Euclidean distances

N(All / plotted) = 1e+05 / 1000

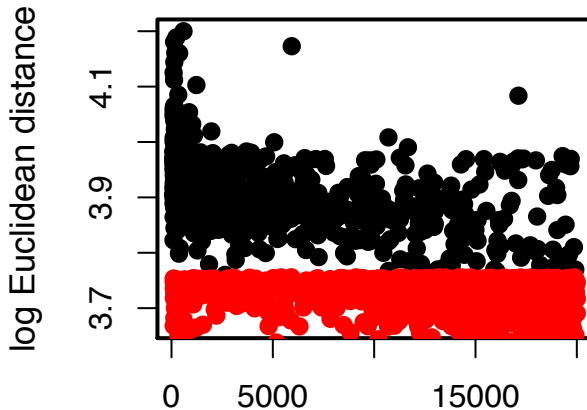

POP\_SIZE2MS

### Posterior with "neuralnet"

"rejection" and prior as reference

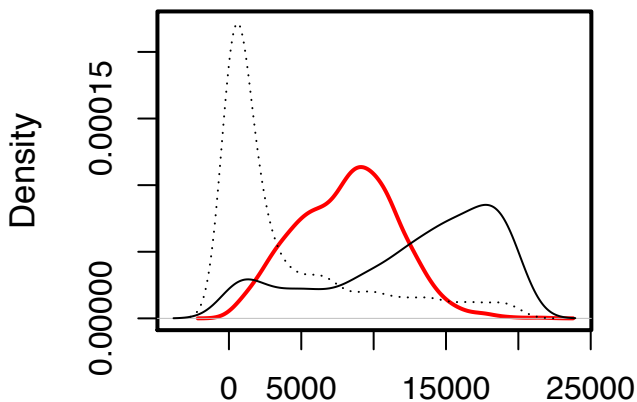

POP\_SIZE2MS

N = 1000 Bandwidth = 780.2

### Residuals from nnet()



Theoretical quantiles

Normal Q-Q plot

### Prior

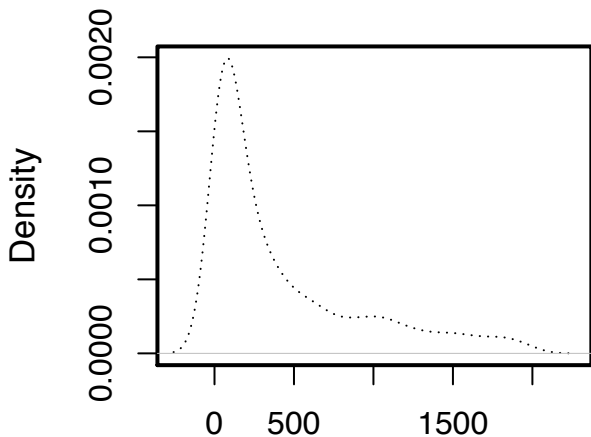

### Euclidean distances

N(All / plotted) = 1e+05 / 1000

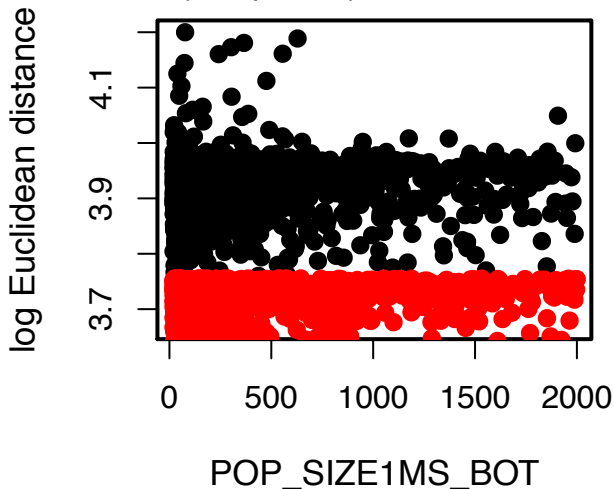

### Posterior with "neuralnet"

"rejection" and prior as reference

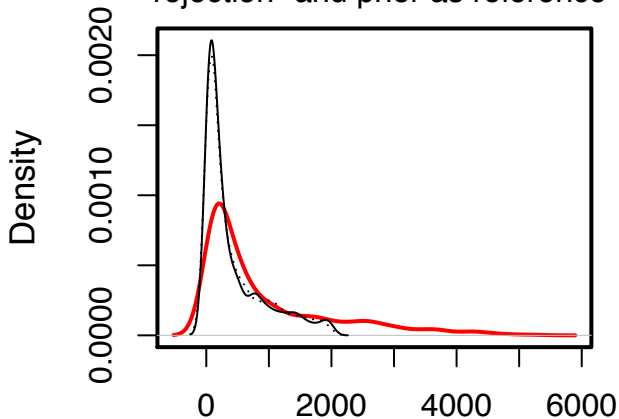

### Residuals from nnet()

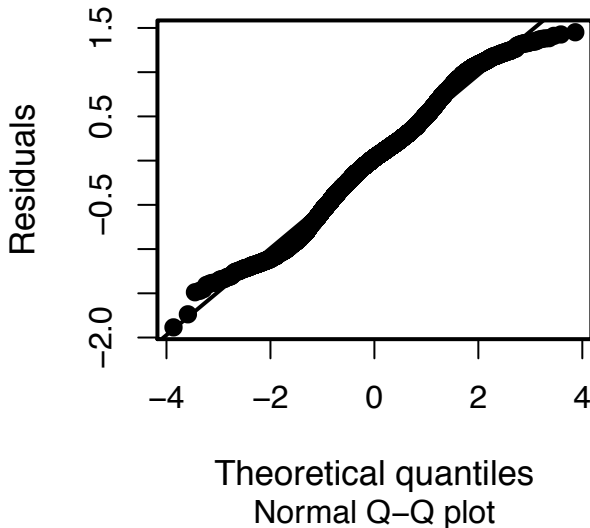

### Prior

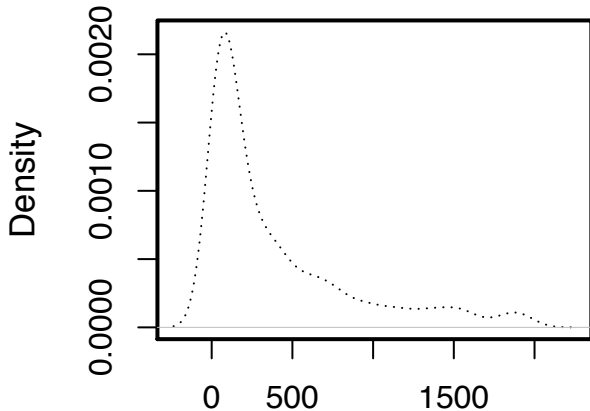

### Euclidean distances

N(All / plotted) = 1e+05 / 1000

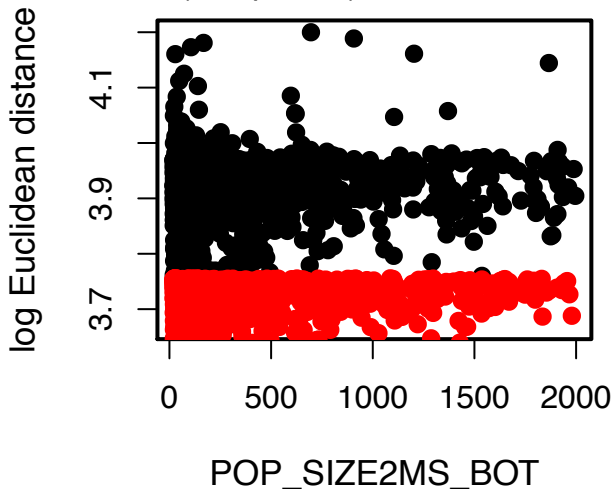

### Posterior with "neuralnet"

"rejection" and prior as reference

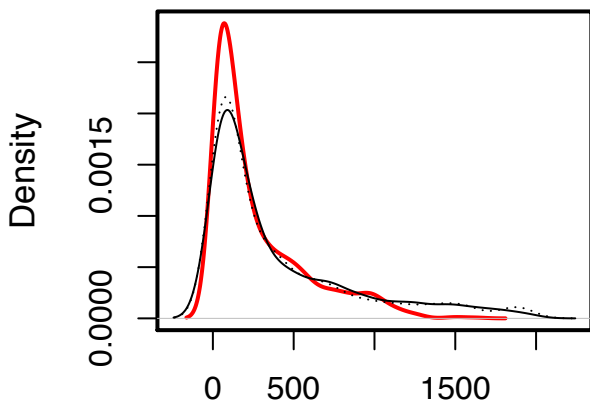

### Residuals from nnet()

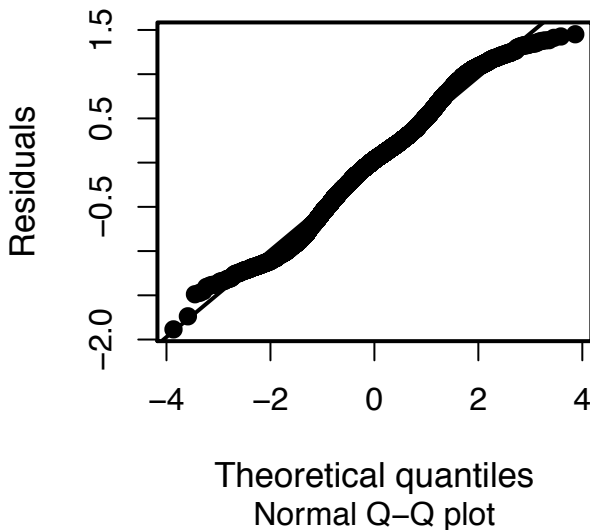

### Prior

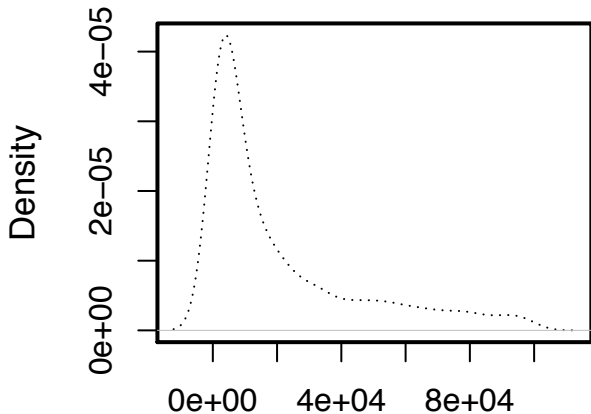

POP\_SIZE1MS\_ANC  
N = 1000 Bandwidth = 4413

### Euclidean distances

N(All / plotted) = 1e+05 / 1000

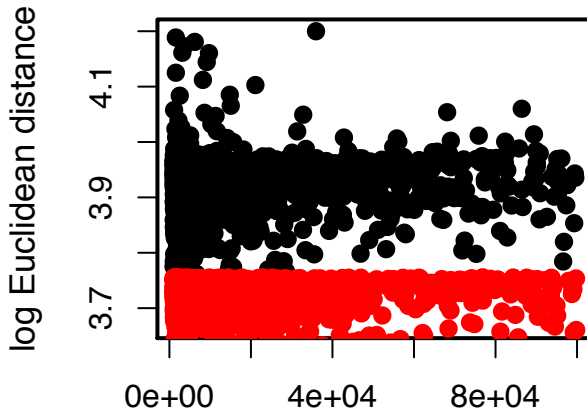

POP\_SIZE1MS\_ANC

### Posterior with "neuralnet"

"rejection" and prior as reference

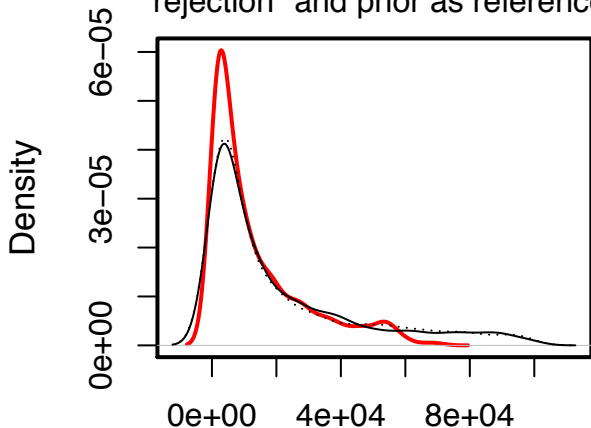

POP\_SIZE1MS\_ANC  
N = 1000 Bandwidth = 2829

### Residuals from nnet()

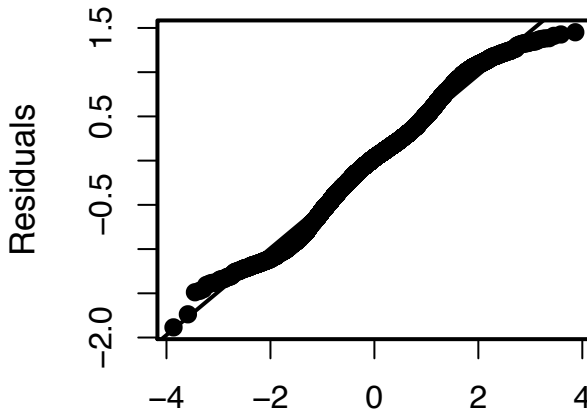

Theoretical quantiles  
Normal Q-Q plot

### Prior

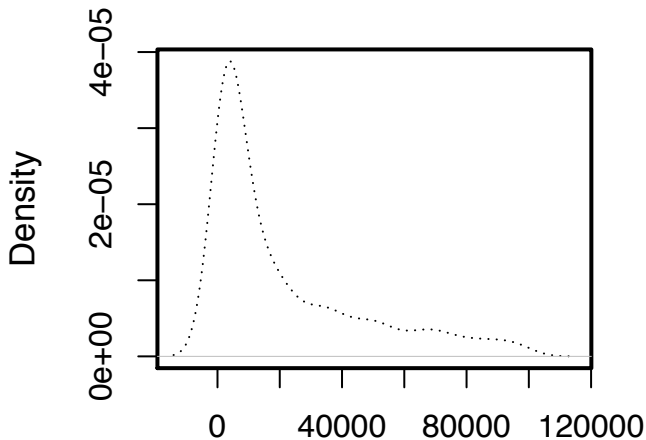

### Euclidean distances

N(All / plotted) = 1e+05 / 1000

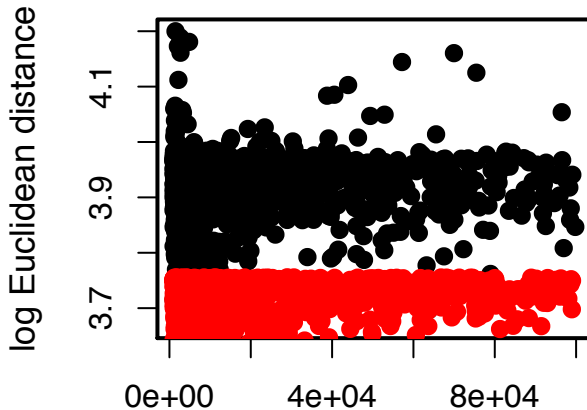

### Posterior with "neuralnet"

"rejection" and prior as reference

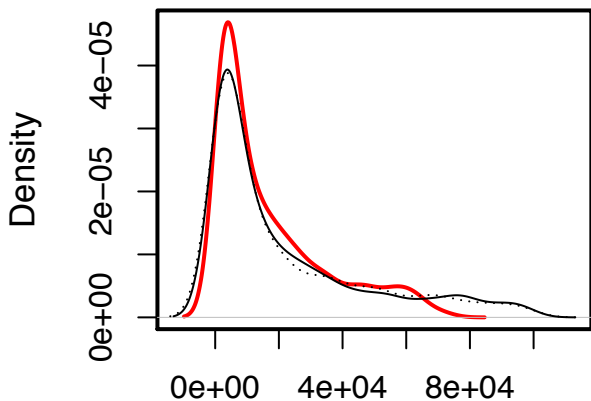

### Residuals from nnet()

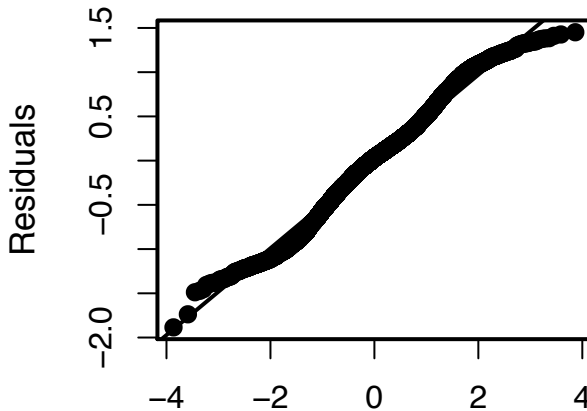

### Prior

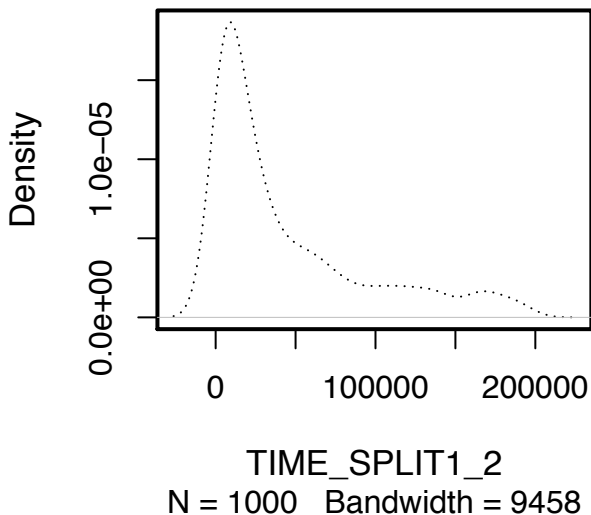

### Euclidean distances

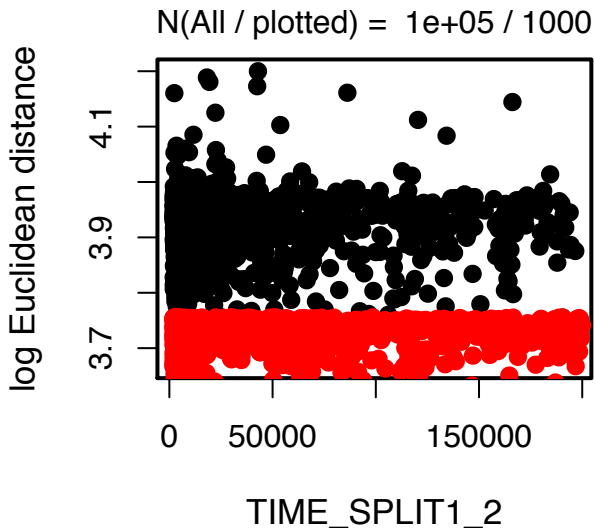

### Posterior with "neuralnet"

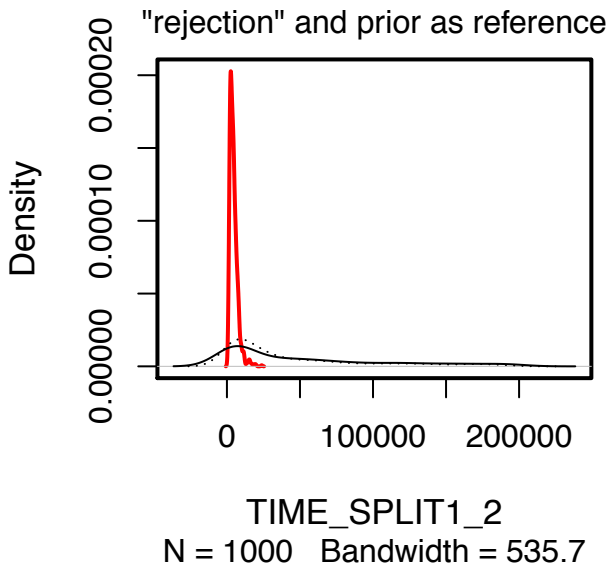

### Residuals from nnet()

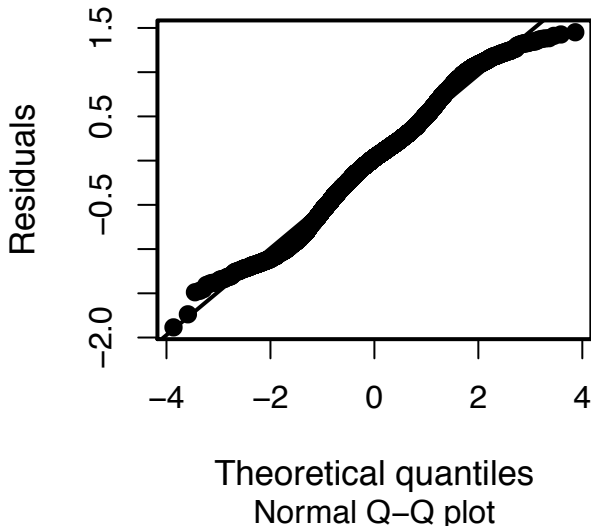

Scenario 2: random lineage sorting with  
continuous gene flow and two migration rates: one  
since divergence  $M_H$  and one since the whaling era  
 $M_W$



### Prior

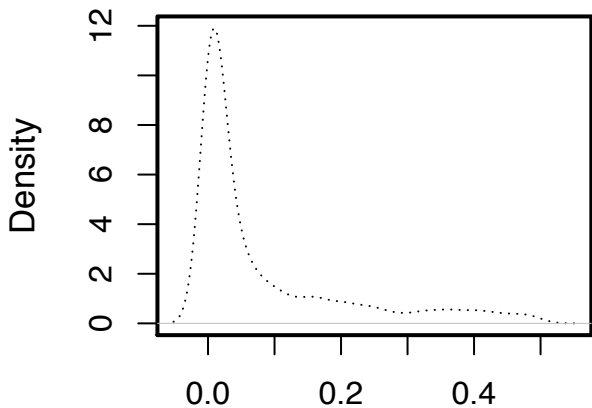

MIGR1\_2W

N = 1000 Bandwidth = 0.01763

### Euclidean distances

N(All / plotted) = 1e+05 / 1000

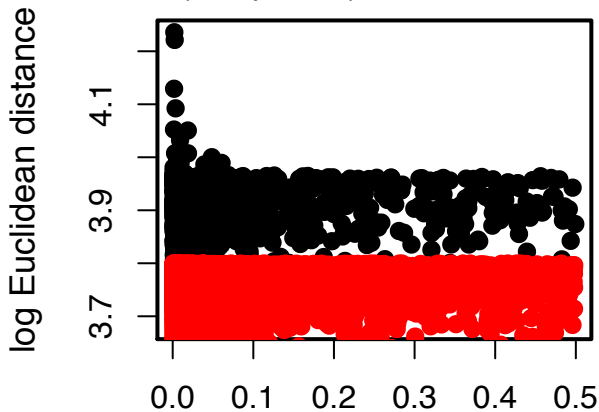

MIGR1\_2W

### Posterior with "neuralnet"

"rejection" and prior as reference

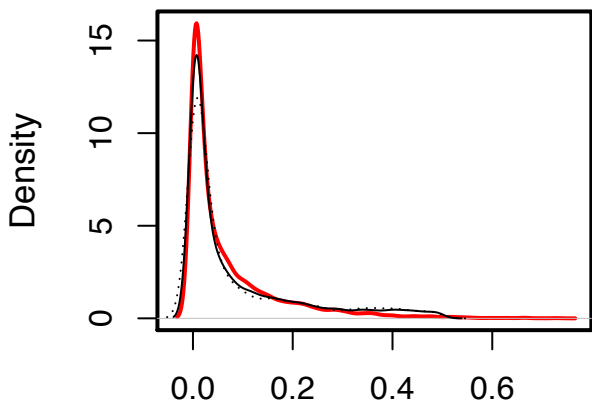

MIGR1\_2W

N = 5000 Bandwidth = 0.01068

### Residuals from nnet()

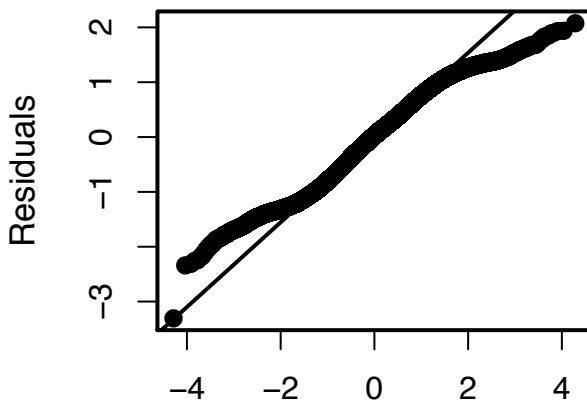

Theoretical quantiles

Normal Q-Q plot

### Prior

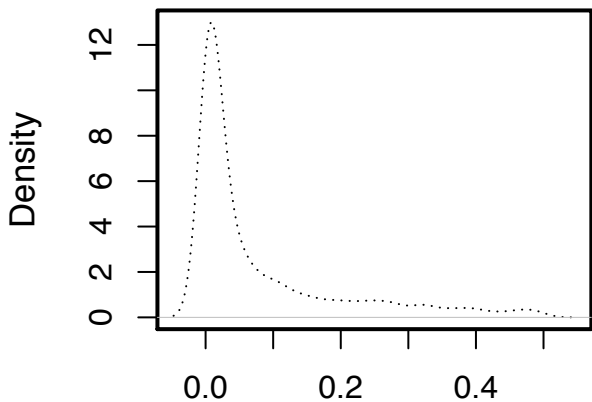

MIGR2\_1W

N = 1000 Bandwidth = 0.01616

### Euclidean distances

N(All / plotted) = 1e+05 / 1000

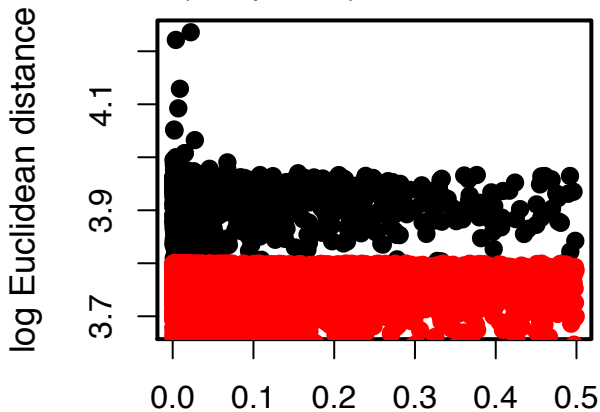

MIGR2\_1W

### Posterior with "neuralnet"

"rejection" and prior as reference

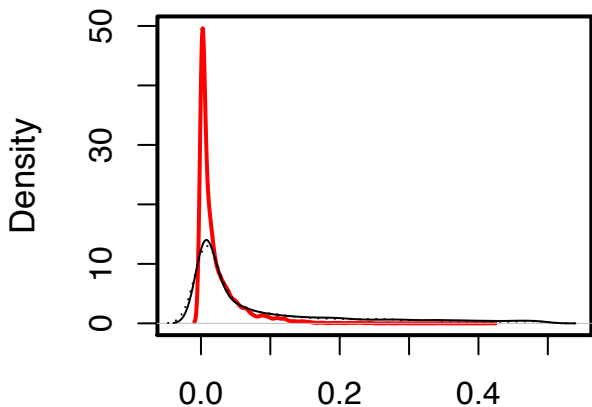

MIGR2\_1W

N = 5000 Bandwidth = 0.003183

### Residuals from nnet()



Theoretical quantiles

Normal Q-Q plot

### Prior

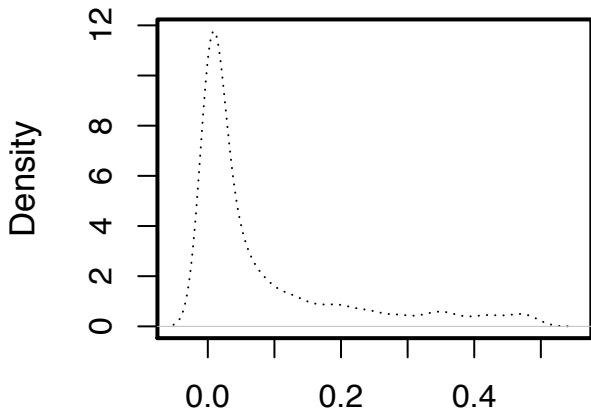

MIGR1\_2H

N = 1000 Bandwidth = 0.0175

### Euclidean distances

N(All / plotted) = 1e+05 / 1000

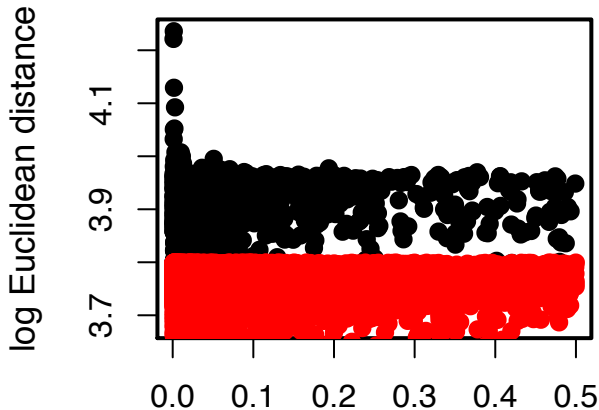

MIGR1\_2H

### Posterior with "neuralnet"

"rejection" and prior as reference

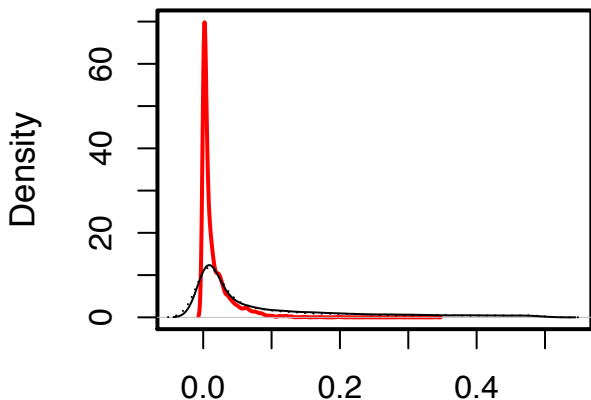

MIGR1\_2H

N = 5000 Bandwidth = 0.002368

### Residuals from nnet()

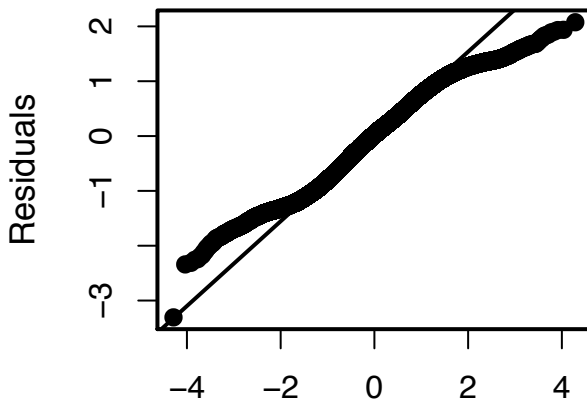

Theoretical quantiles

Normal Q-Q plot

### Prior

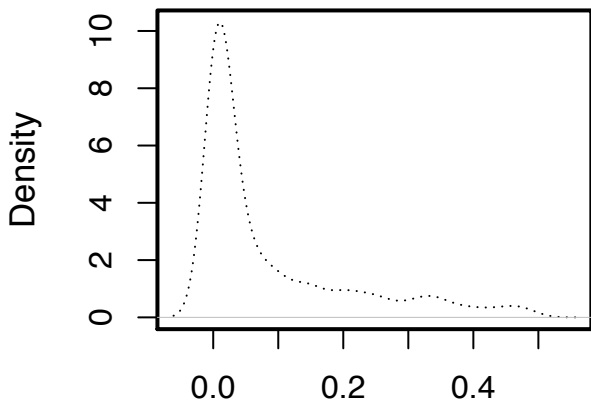

MIGR2\_1H

N = 1000 Bandwidth = 0.02069

### Euclidean distances

N(All / plotted) = 1e+05 / 1000

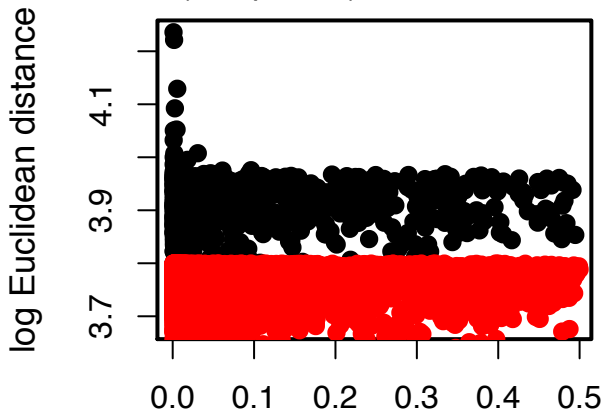

MIGR2\_1H

### Posterior with "neuralnet"

"rejection" and prior as reference

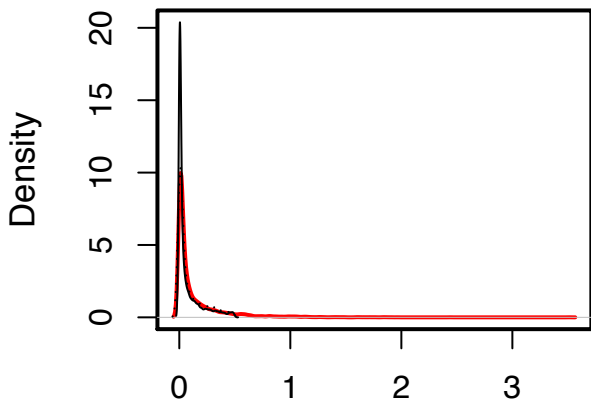

MIGR2\_1H

N = 5000 Bandwidth = 0.01757

### Residuals from nnet()

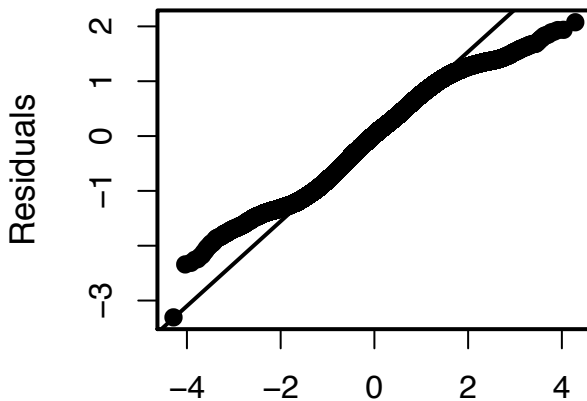

Theoretical quantiles

Normal Q-Q plot

### Prior

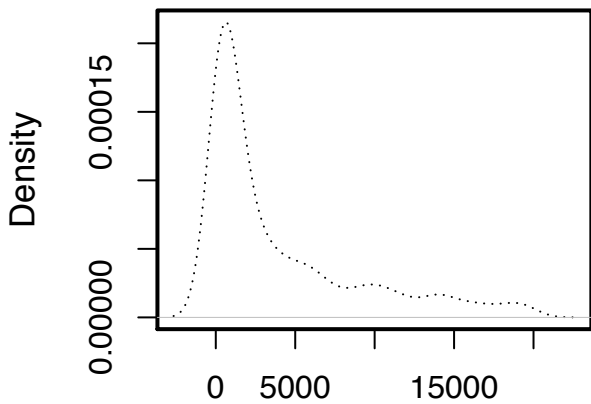

POP\_SIZE1MS  
N = 1000 Bandwidth = 920.3

### Euclidean distances

N(All / plotted) = 1e+05 / 1000

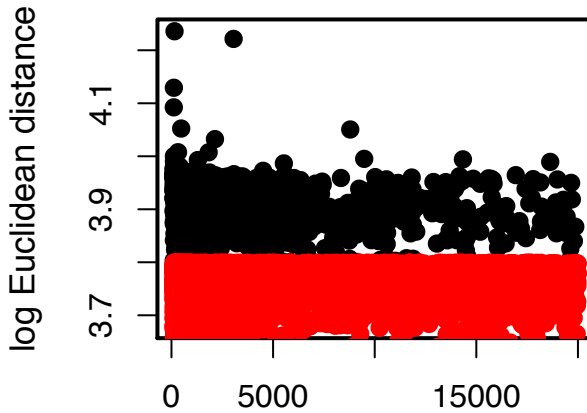

POP\_SIZE1MS

### Posterior with "neuralnet"

"rejection" and prior as reference

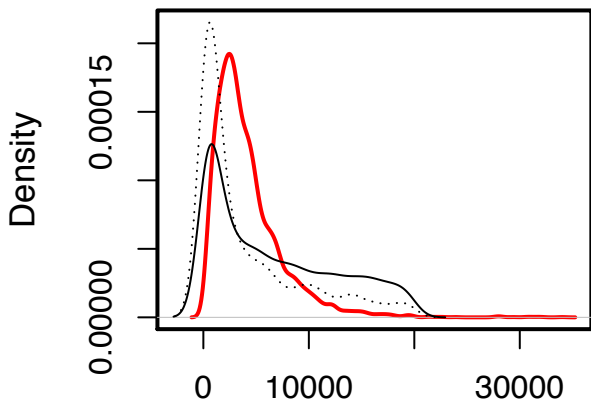

POP\_SIZE1MS  
N = 5000 Bandwidth = 409.8

### Residuals from nnet()

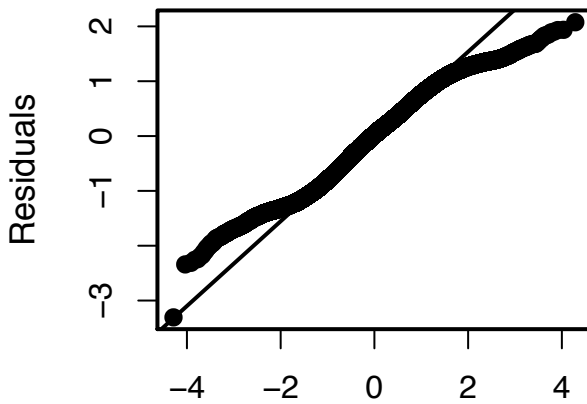

Theoretical quantiles  
Normal Q-Q plot

### Prior

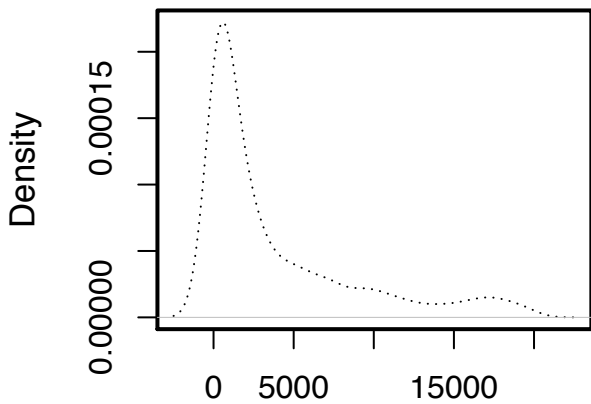

POP\_SIZE2MS

N = 1000 Bandwidth = 866.2

### Euclidean distances

N(All / plotted) = 1e+05 / 1000

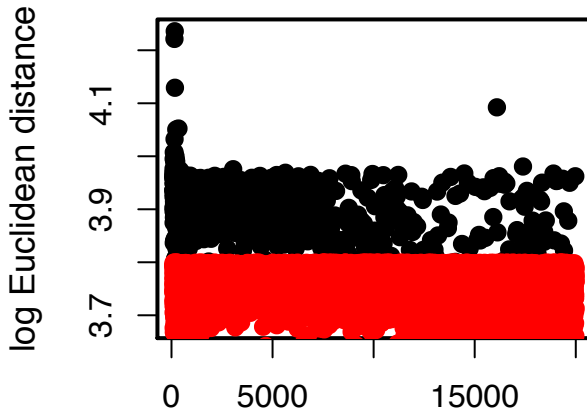

POP\_SIZE2MS

### Posterior with "neuralnet"

"rejection" and prior as reference

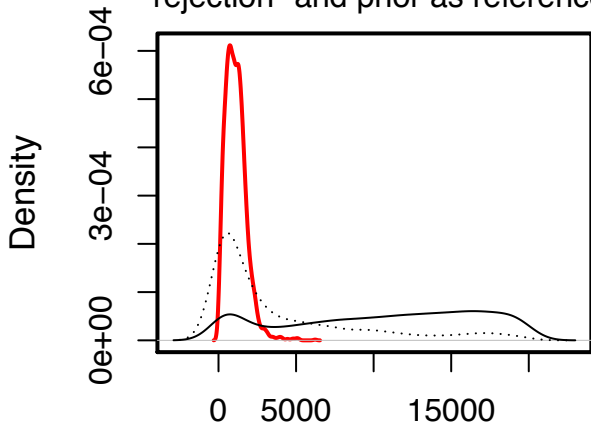

POP\_SIZE2MS

N = 5000 Bandwidth = 104.9

### Residuals from nnet()



Theoretical quantiles

Normal Q-Q plot

### Prior

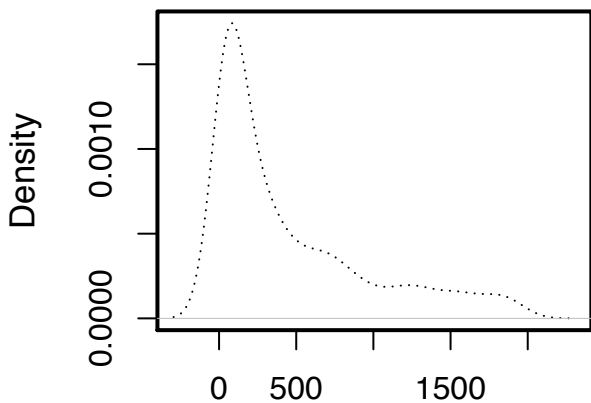

POP\_SIZE1MS\_BOT  
N = 1000 Bandwidth = 105.1

### Euclidean distances

N(All / plotted) = 1e+05 / 1000

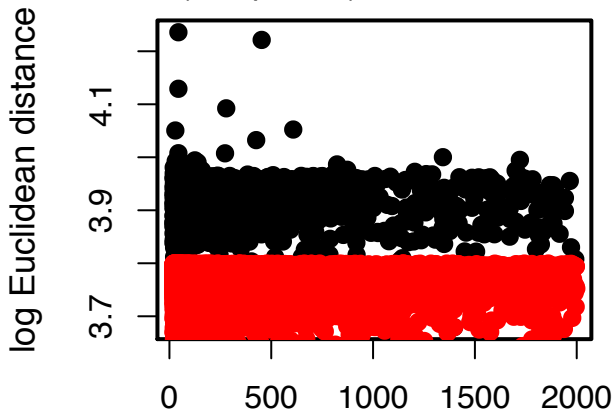

POP\_SIZE1MS\_BOT

### Posterior with "neuralnet"

"rejection" and prior as reference

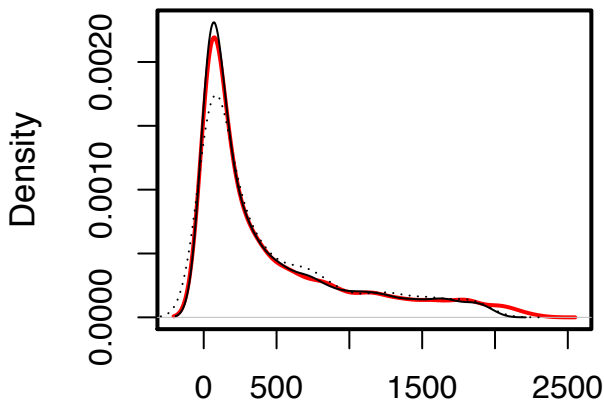

POP\_SIZE1MS\_BOT  
N = 5000 Bandwidth = 74.93

### Residuals from nnet()



Theoretical quantiles  
Normal Q-Q plot

### Prior

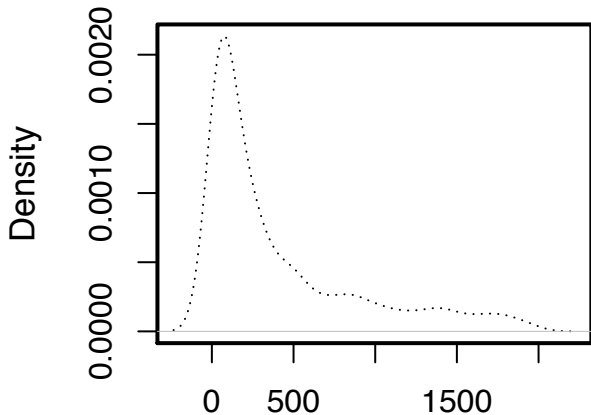

POP\_SIZE2MS\_BOT  
N = 1000 Bandwidth = 84.94

### Euclidean distances

N(All / plotted) = 1e+05 / 1000

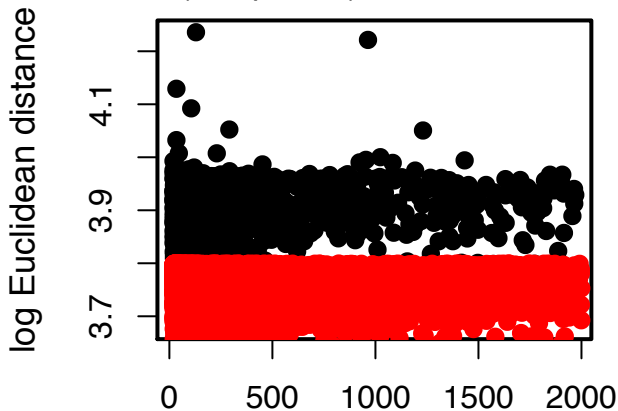

POP\_SIZE2MS\_BOT

### Posterior with "neuralnet"

"rejection" and prior as reference

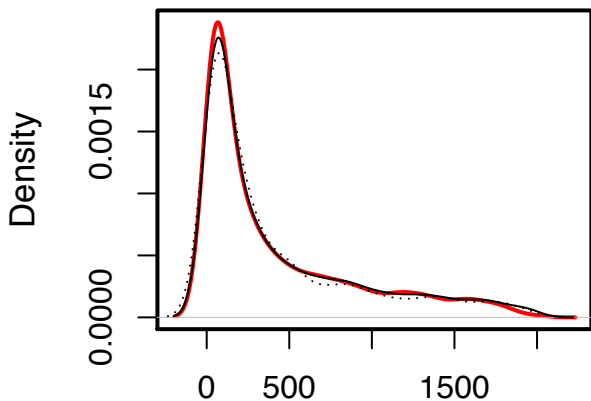

POP\_SIZE2MS\_BOT  
N = 5000 Bandwidth = 69.96

### Residuals from nnet()



Theoretical quantiles  
Normal Q-Q plot



### Prior

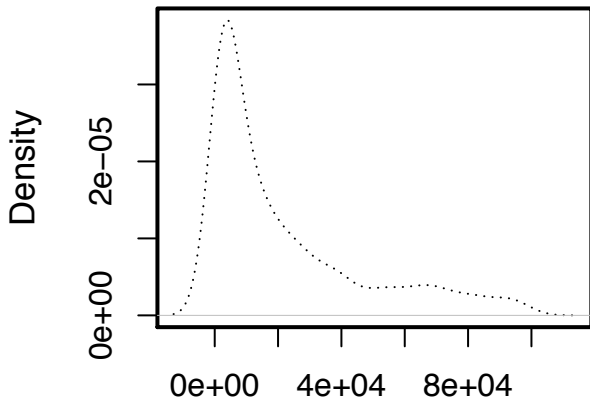

### Euclidean distances

N(All / plotted) = 1e+05 / 1000

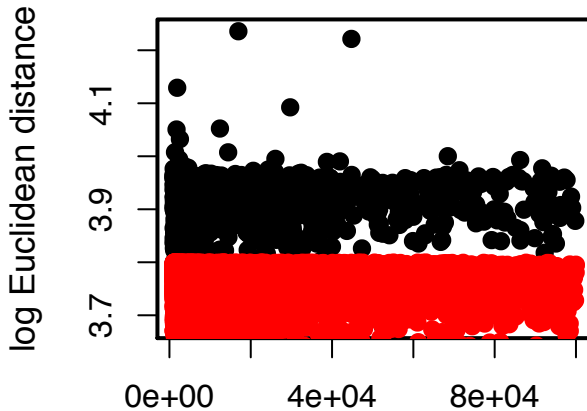

### Posterior with "neuralnet"

"rejection" and prior as reference

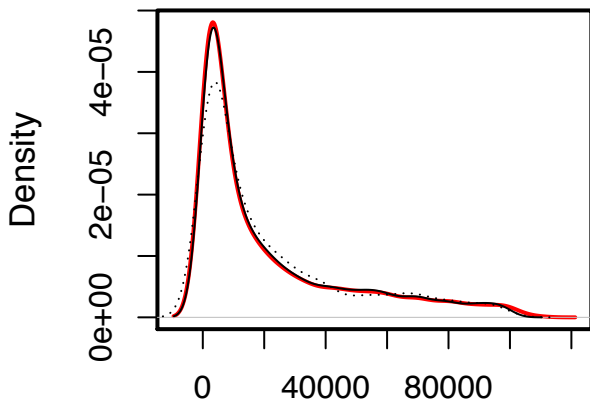

### Residuals from nnet()



### Prior

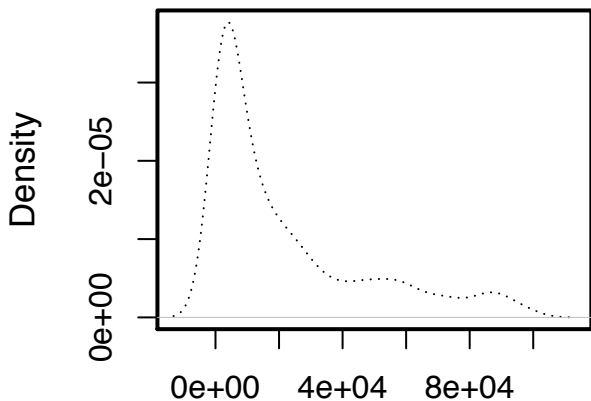

POP\_SIZE2MS\_ANC  
N = 1000 Bandwidth = 4737

### Euclidean distances

N(All / plotted) = 1e+05 / 1000

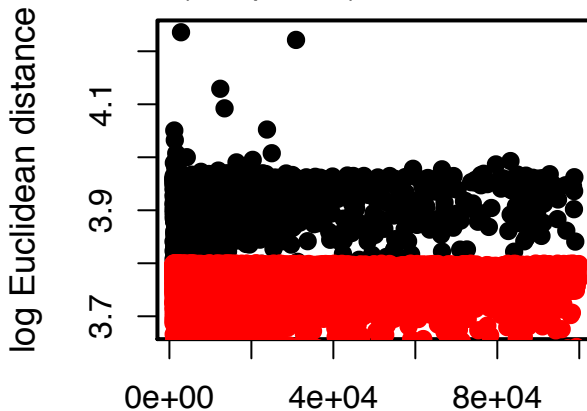

POP\_SIZE2MS\_ANC

### Posterior with "neuralnet"

"rejection" and prior as reference

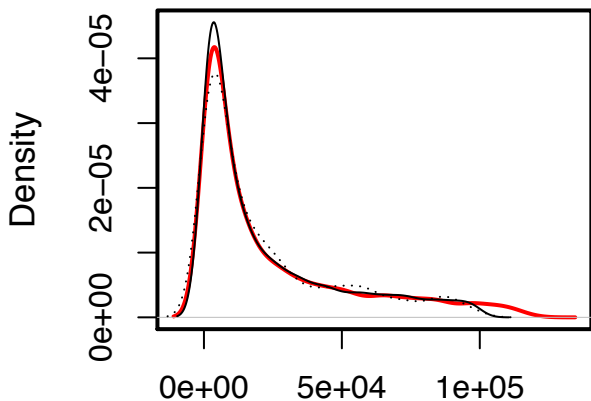

POP\_SIZE2MS\_ANC  
N = 5000 Bandwidth = 3949

### Residuals from nnet()



Theoretical quantiles  
Normal Q-Q plot

### Prior

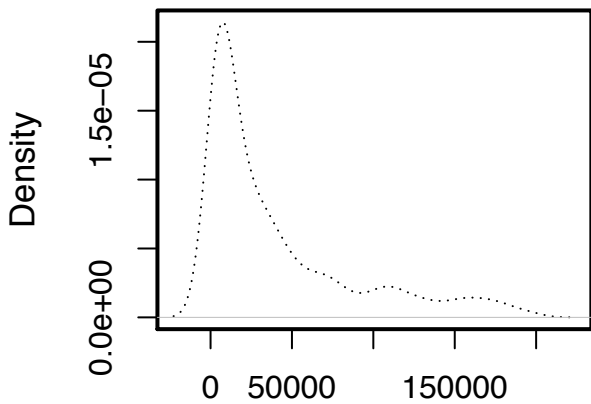

TIME\_SPLIT1\_2  
N = 1000 Bandwidth = 8256

### Euclidean distances

N(All / plotted) = 1e+05 / 1000

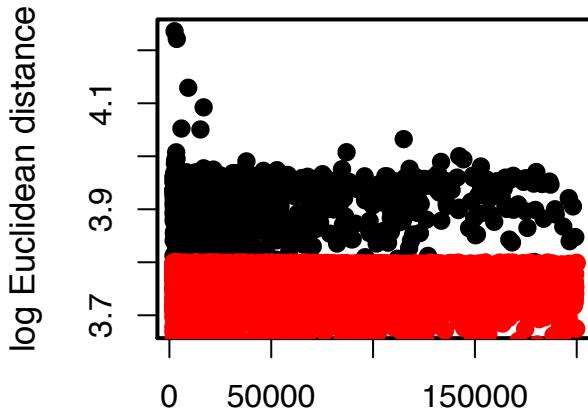

TIME\_SPLIT1\_2

### Posterior with "neuralnet"

"rejection" and prior as reference

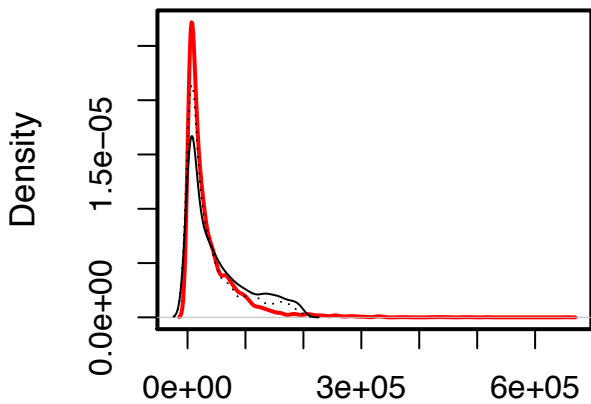

TIME\_SPLIT1\_2  
N = 5000 Bandwidth = 4982

### Residuals from nnet()

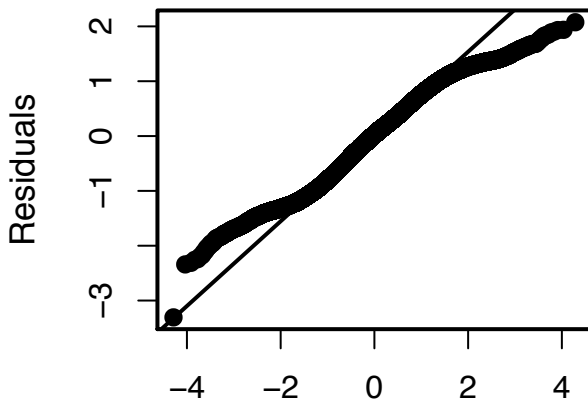

Theoretical quantiles  
Normal Q-Q plot

Scenario 3: isolation following divergence,  
with no subsequent gene flow

### Prior

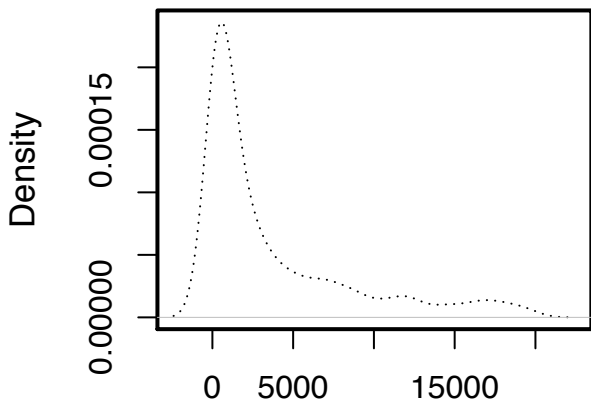

### Euclidean distances

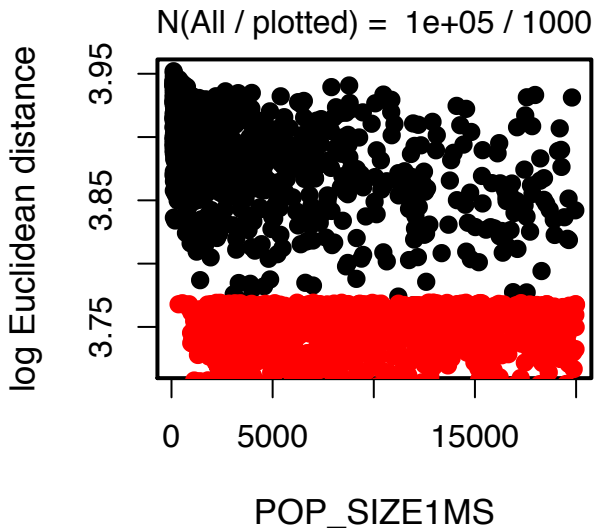

### Posterior with "neuralnet"

"rejection" and prior as reference

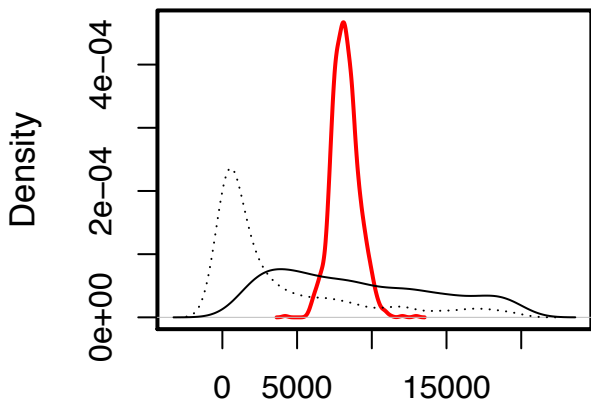

### Residuals from nnet()

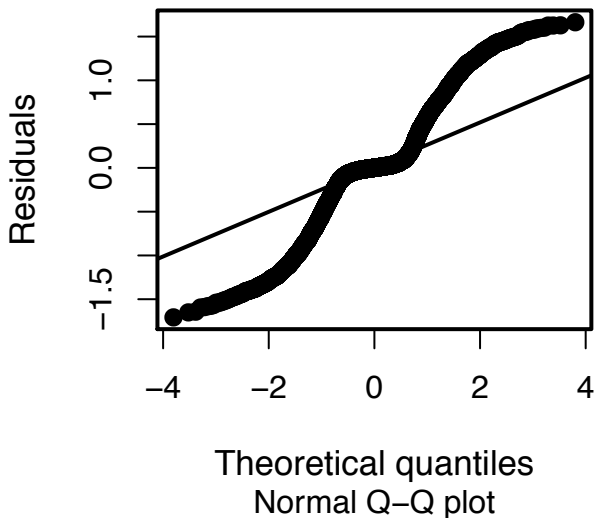

### Prior

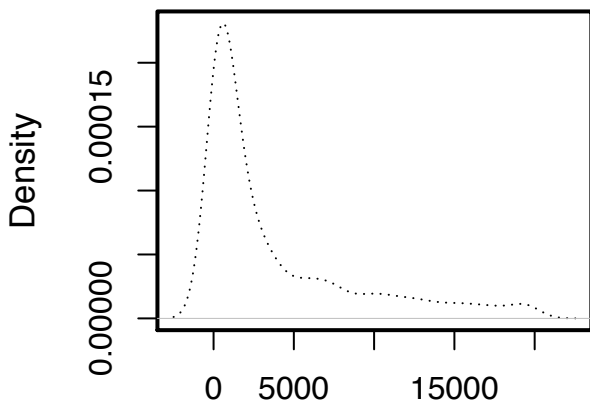

### Euclidean distances

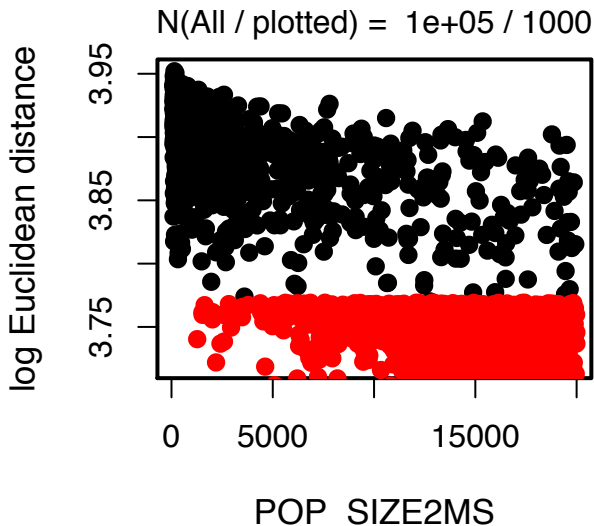

### Posterior with "neuralnet"

"rejection" and prior as reference

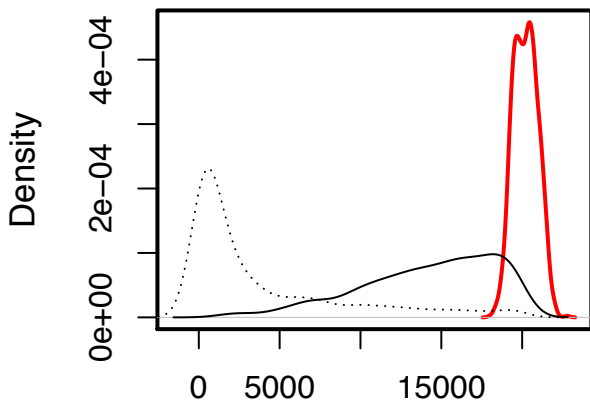

### Residuals from nnet()

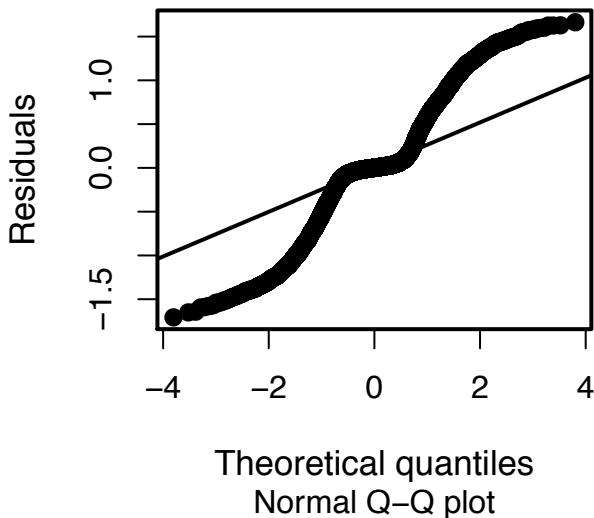

### Prior

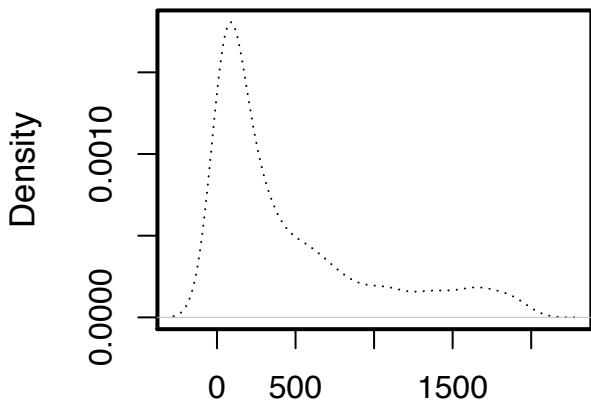

### Euclidean distances

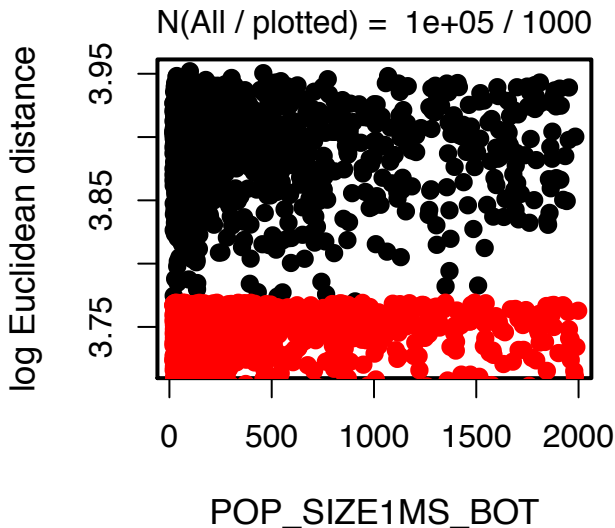

### Posterior with "neuralnet"

"rejection" and prior as reference

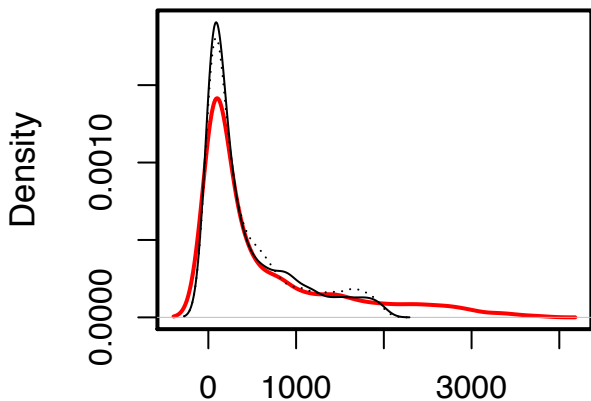

### Residuals from nnet()

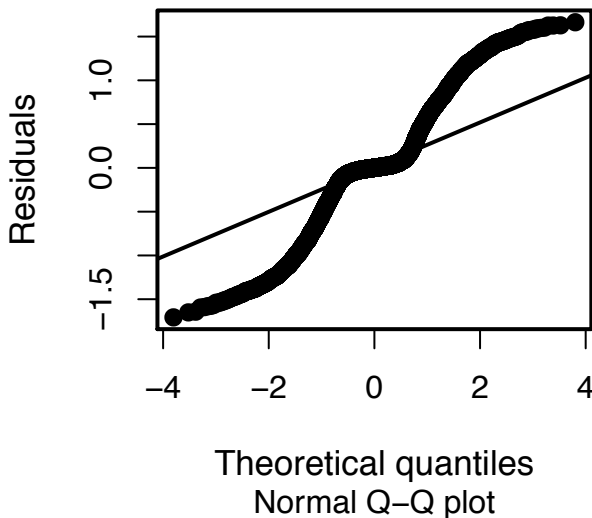

### Prior

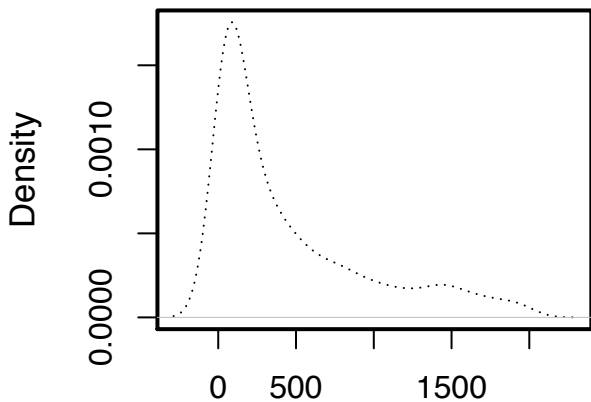

### Euclidean distances

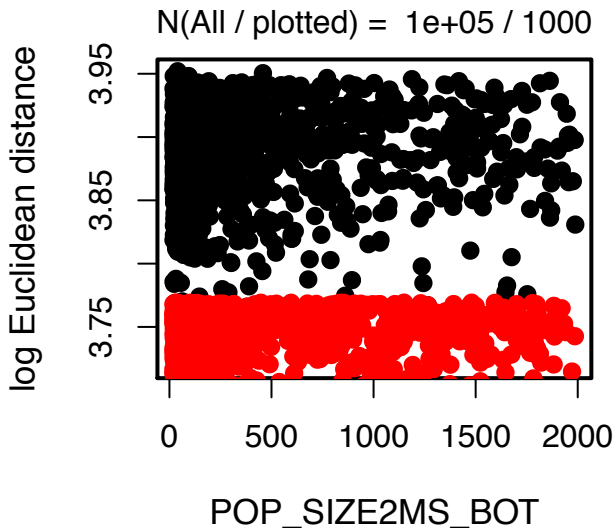

### Posterior with "neuralnet"

"rejection" and prior as reference

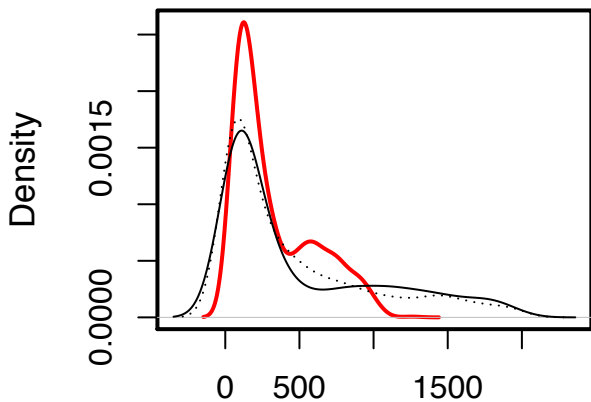

### Residuals from nnet()





**Prior**

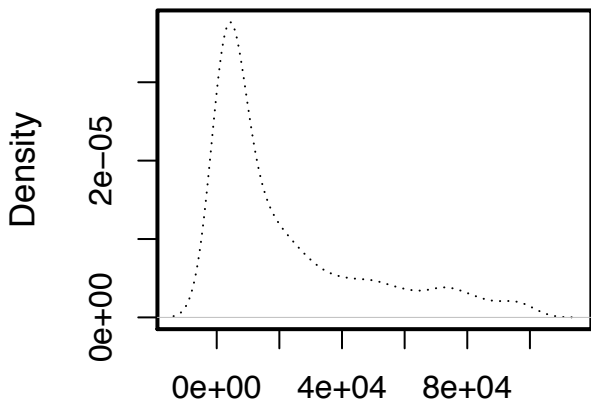

**Euclidean distances**

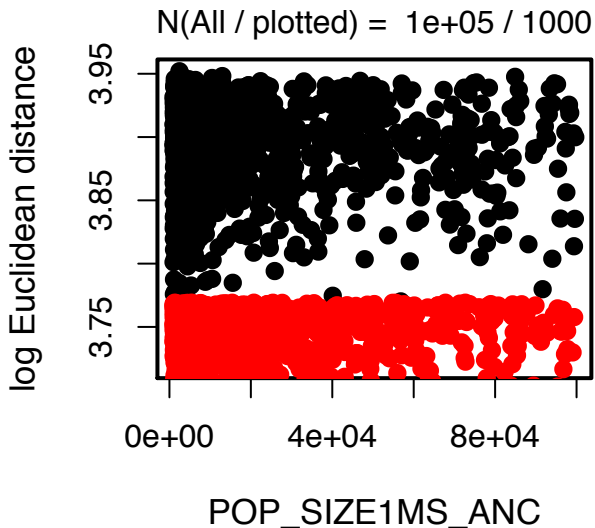

**Posterior with "neuralnet"**

"rejection" and prior as reference

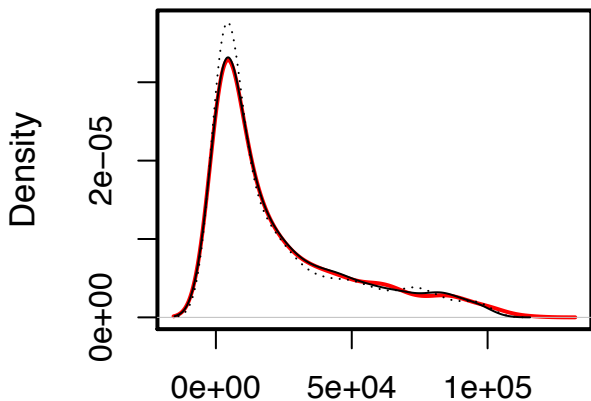

**Residuals from nnet()**



### Prior

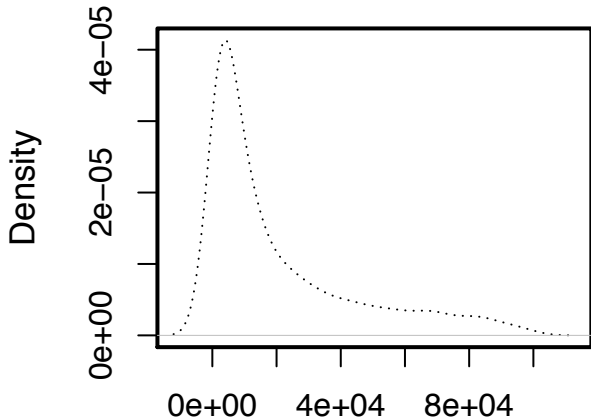

POP\_SIZE2MS\_ANC  
N = 1000 Bandwidth = 4368

### Euclidean distances

N(All / plotted) = 1e+05 / 1000

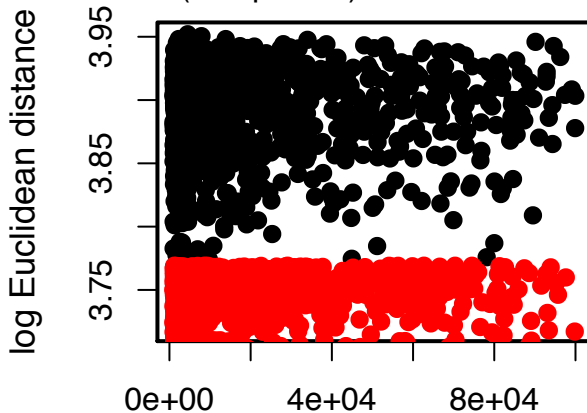

POP\_SIZE2MS\_ANC

### Posterior with "neuralnet"

"rejection" and prior as reference

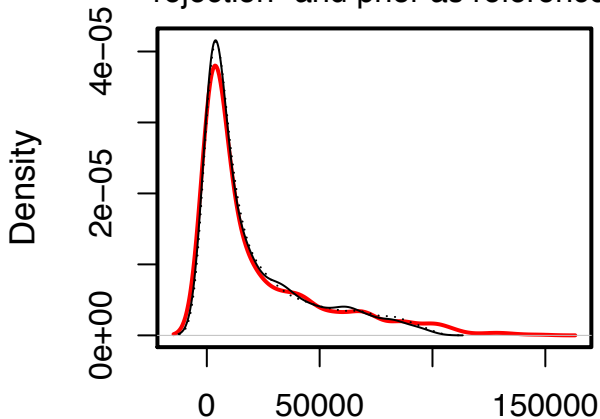

POP\_SIZE2MS\_ANC  
N = 1000 Bandwidth = 5132

### Residuals from nnet()

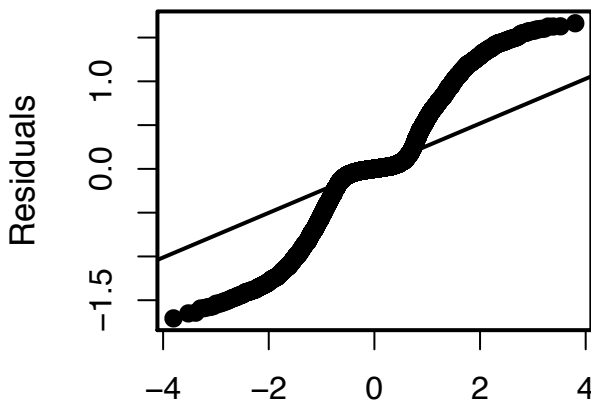

Theoretical quantiles  
Normal Q-Q plot

### Prior

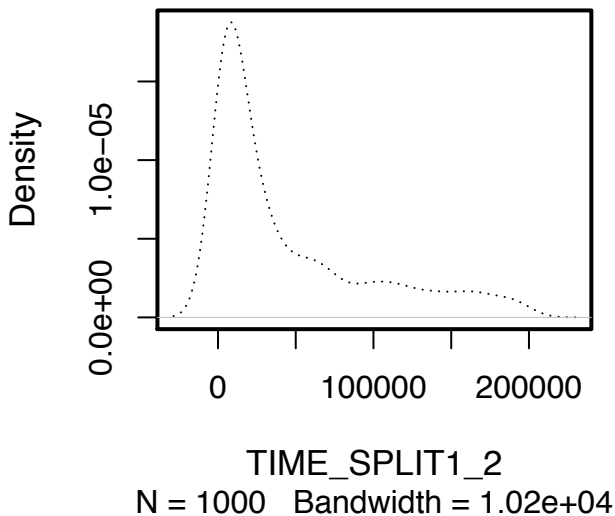

### Euclidean distances

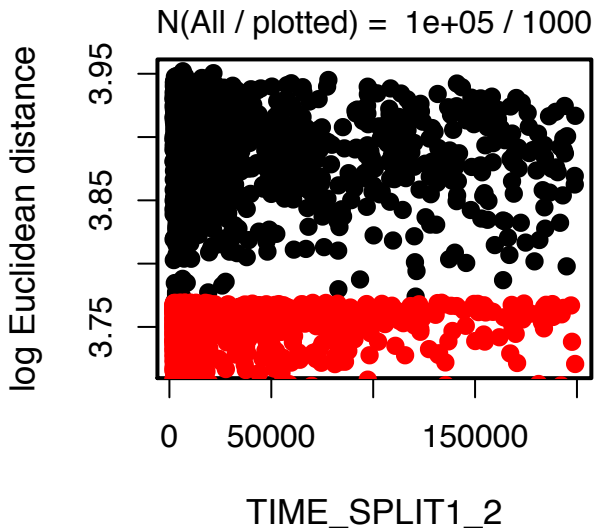

### Posterior with "neuralnet"

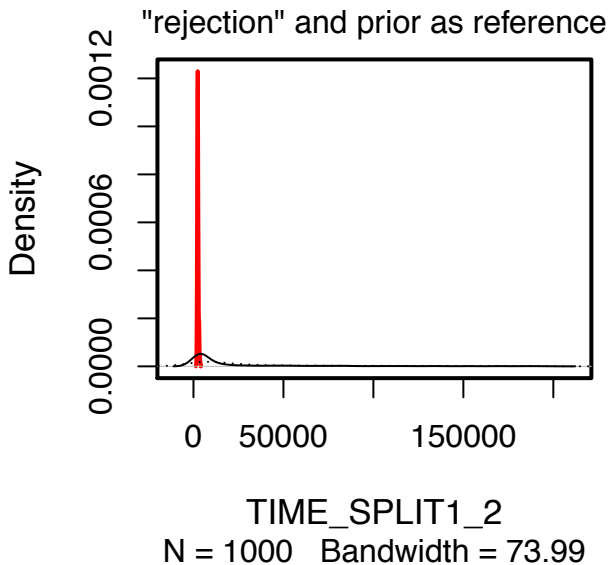

### Residuals from nnet()

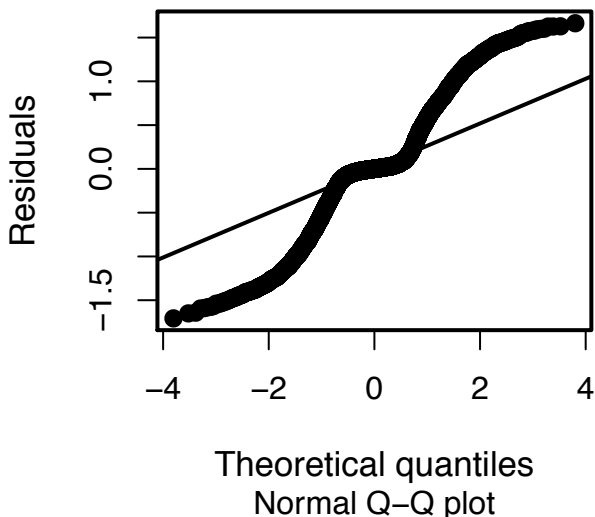

Scenario 4: isolation following divergence,  
with gene flow with one migration rate since the  
whaling era  $M_W$

### Prior

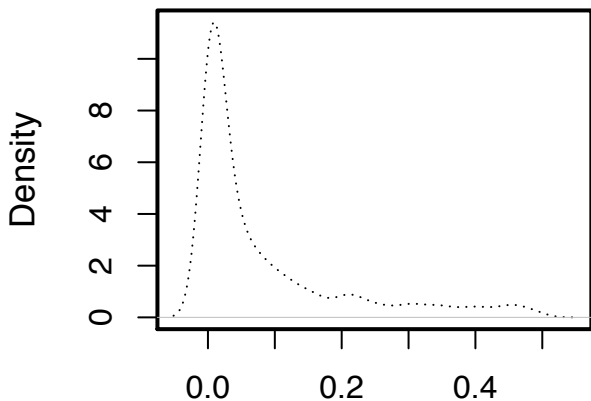

MIGR1\_2W

N = 1000 Bandwidth = 0.01751

### Euclidean distances

N(All / plotted) = 1e+05 / 1000

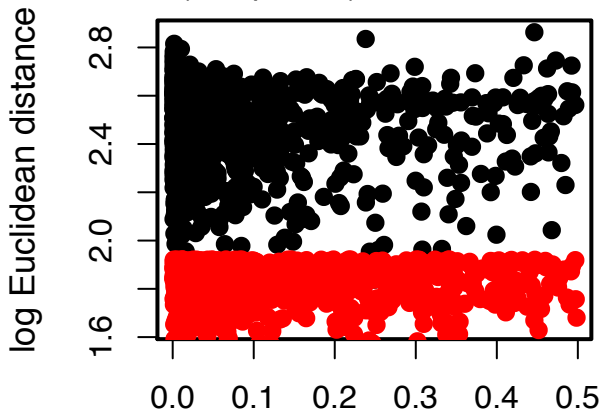

MIGR1\_2W

### Posterior with "neuralnet"

"rejection" and prior as reference

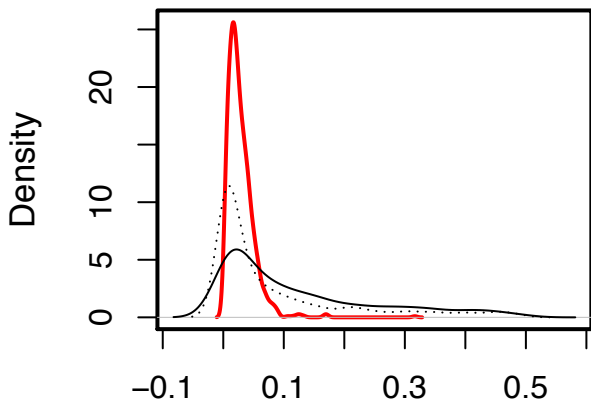

MIGR1\_2W

N = 1000 Bandwidth = 0.004071

### Residuals from nnet()

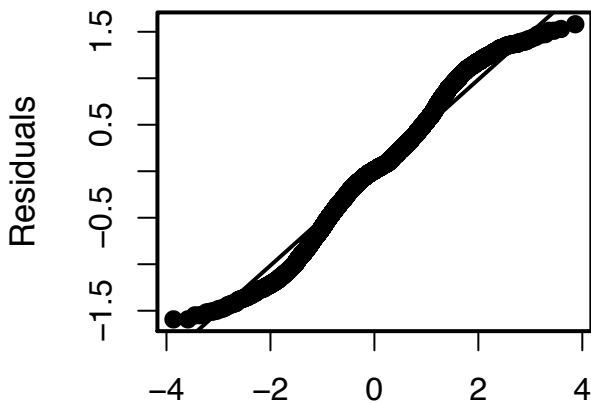

Theoretical quantiles

Normal Q-Q plot

### Prior

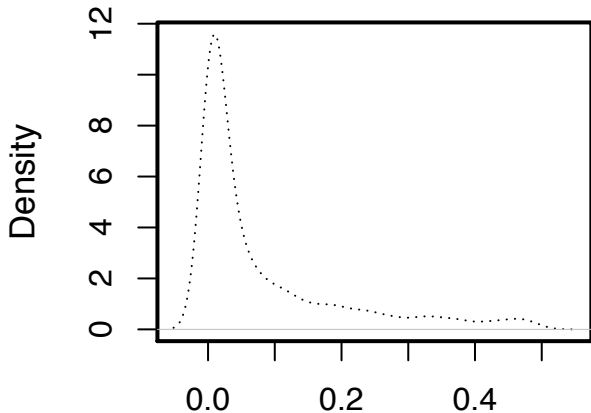

MIGR2\_1W

N = 1000 Bandwidth = 0.01758

### Euclidean distances

N(All / plotted) = 1e+05 / 1000

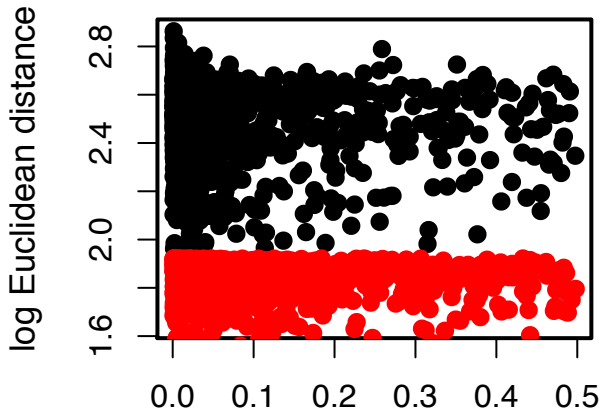

MIGR2\_1W

### Posterior with "neuralnet"

"rejection" and prior as reference

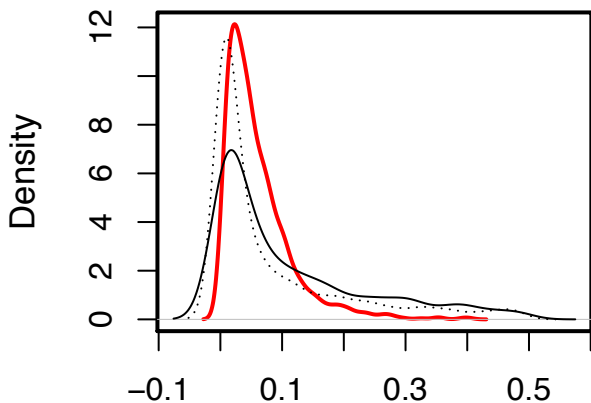

MIGR2\_1W

N = 1000 Bandwidth = 0.009612

### Residuals from nnet()



Theoretical quantiles

Normal Q-Q plot

### Prior

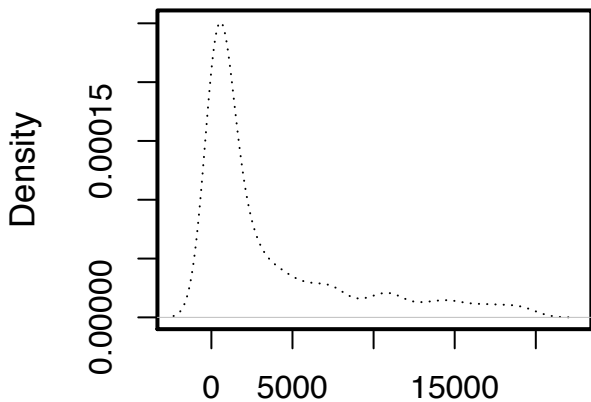

### Euclidean distances

N(All / plotted) = 1e+05 / 1000

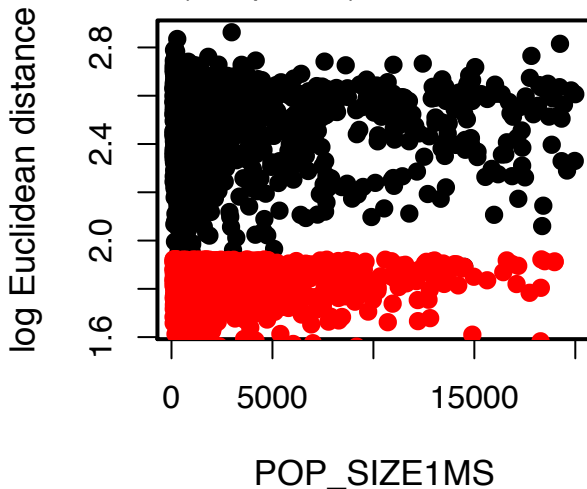

### Posterior with "neuralnet"

"rejection" and prior as reference

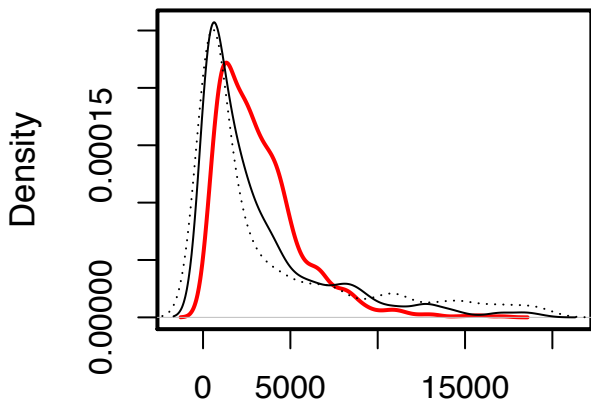

### Residuals from nnet()

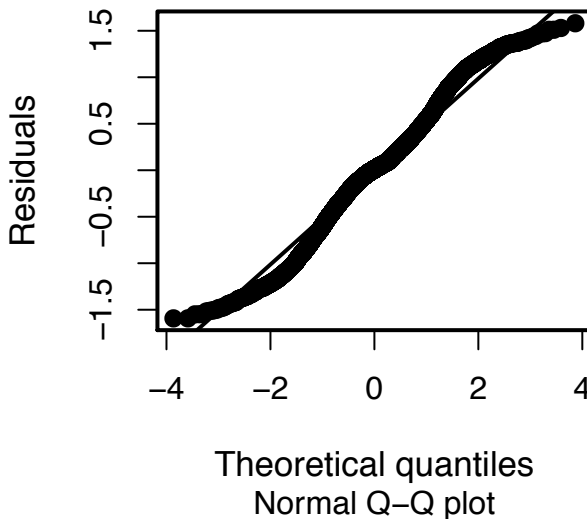

### Prior

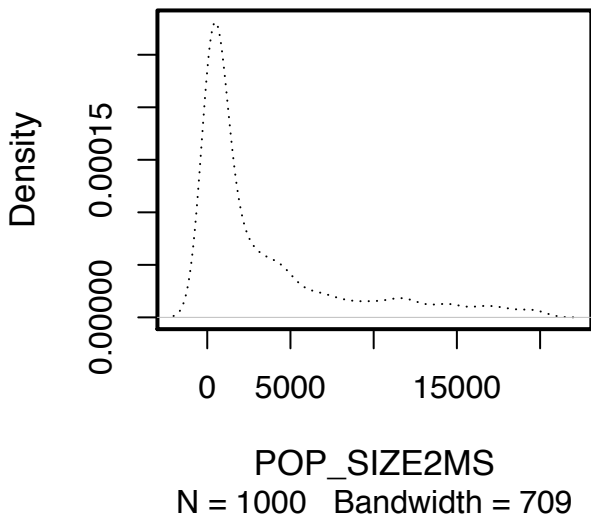

### Euclidean distances

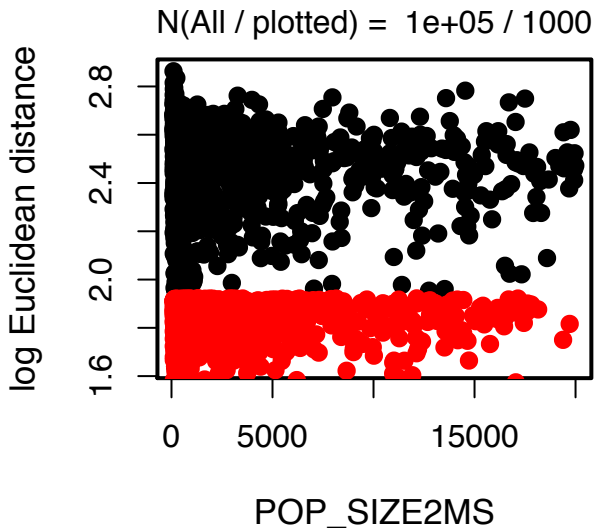

### Posterior with "neuralnet"

"rejection" and prior as reference

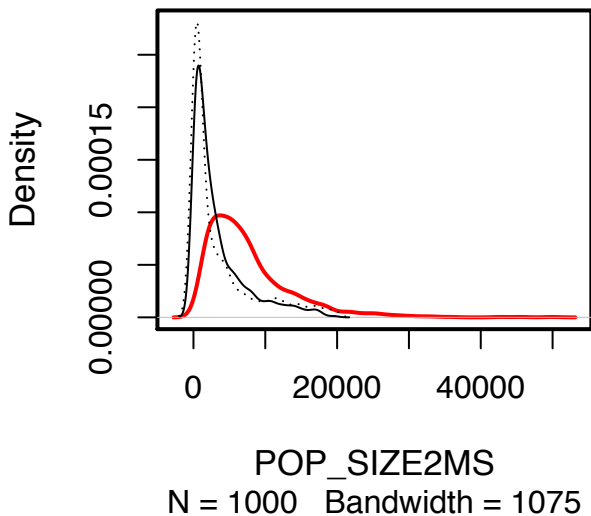

### Residuals from nnet()

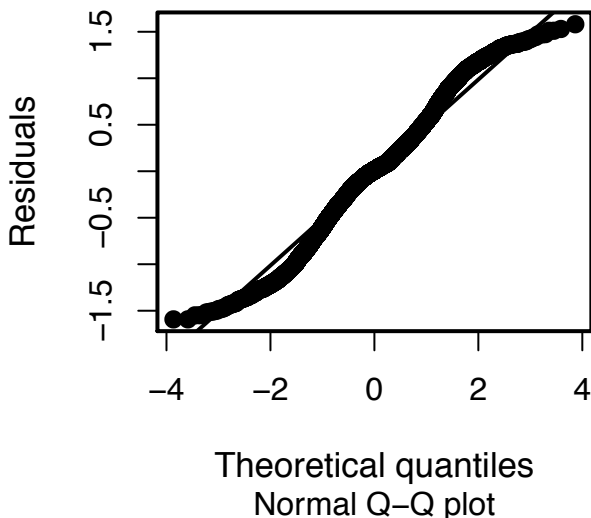



### Prior

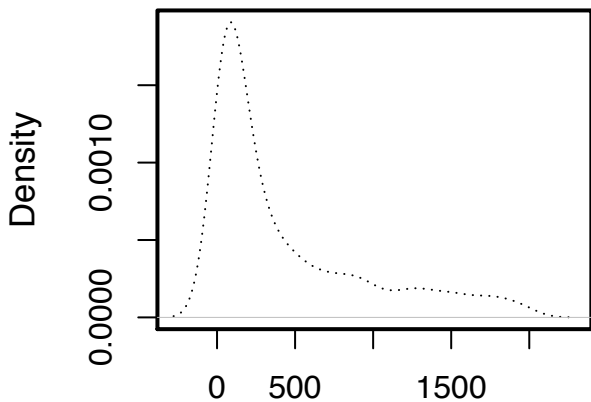

POP\_SIZE1MS\_BOT  
N = 1000 Bandwidth = 99.58

### Euclidean distances

N(All / plotted) = 1e+05 / 1000

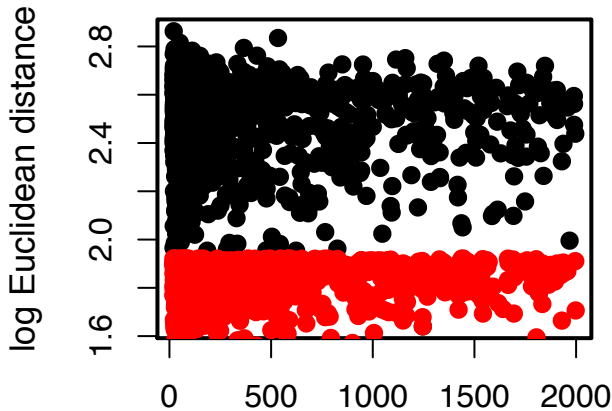

POP\_SIZE1MS\_BOT

### Posterior with "neuralnet"

"rejection" and prior as reference

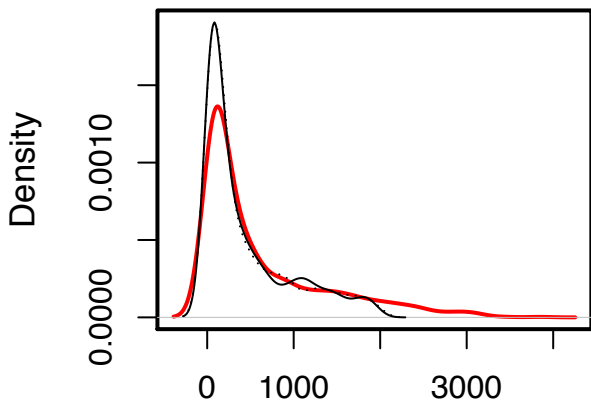

POP\_SIZE1MS\_BOT  
N = 1000 Bandwidth = 136.1

### Residuals from nnet()



Theoretical quantiles  
Normal Q-Q plot

### Prior

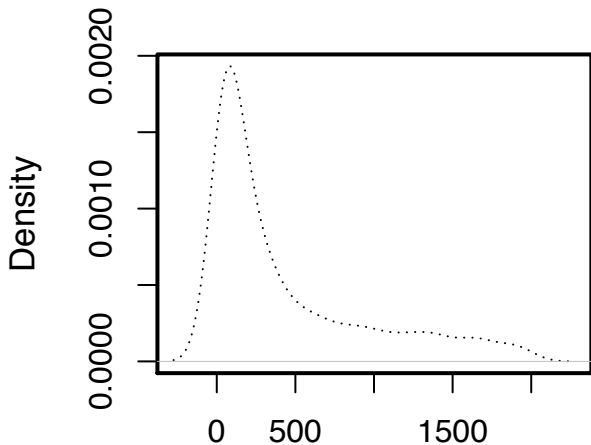

POP\_SIZE2MS\_BOT  
N = 1000 Bandwidth = 98.4

### Euclidean distances

N(All / plotted) = 1e+05 / 1000

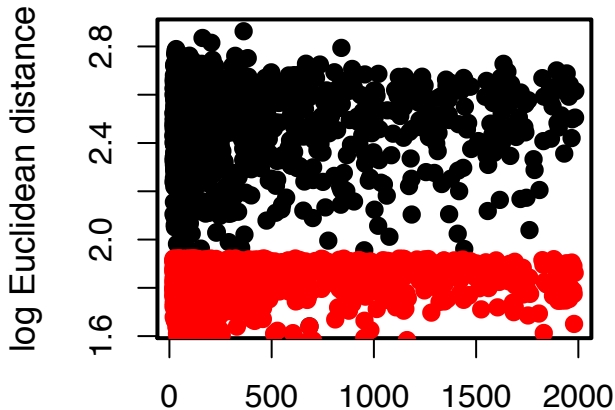

POP\_SIZE2MS\_BOT

### Posterior with "neuralnet"

"rejection" and prior as reference

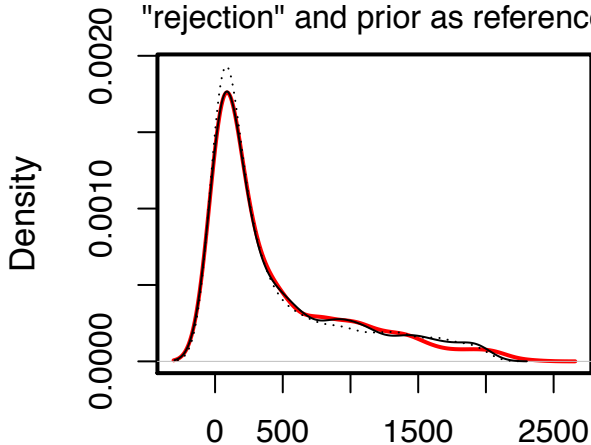

POP\_SIZE2MS\_BOT  
N = 1000 Bandwidth = 107.3

### Residuals from nnet()

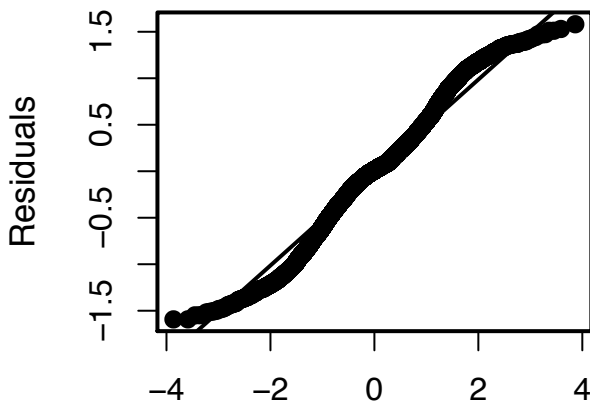

Theoretical quantiles  
Normal Q-Q plot

**Prior**

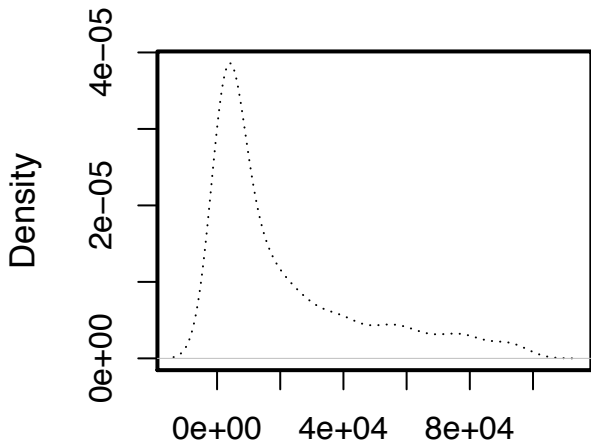

POP\_SIZE1MS\_ANC  
N = 1000 Bandwidth = 4929

**Euclidean distances**

N(All / plotted) = 1e+05 / 1000

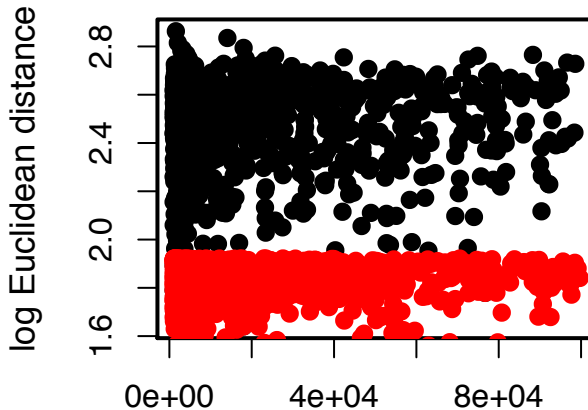

POP\_SIZE1MS\_ANC

**Posterior with "neuralnet"**

"rejection" and prior as reference

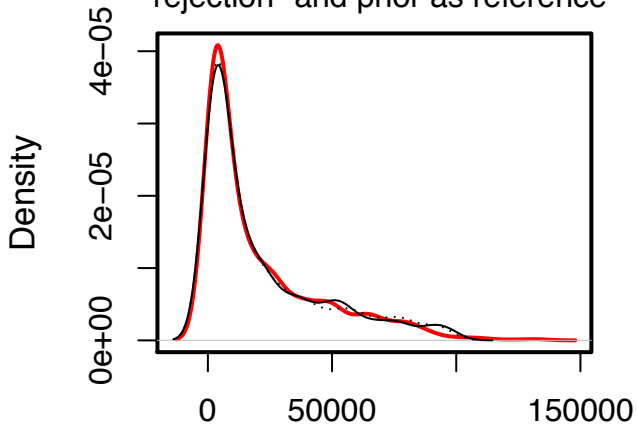

POP\_SIZE1MS\_ANC  
N = 1000 Bandwidth = 4513

**Residuals from nnet()**

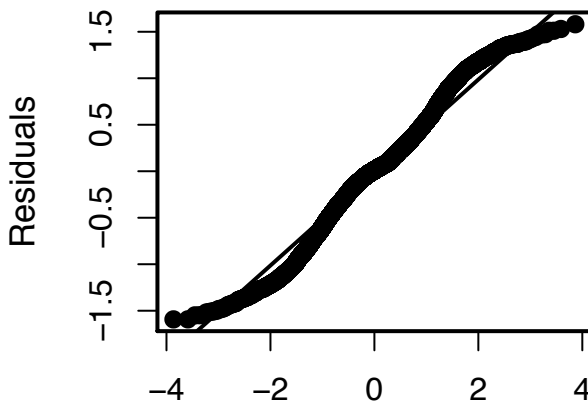

Theoretical quantiles  
Normal Q-Q plot

### Prior

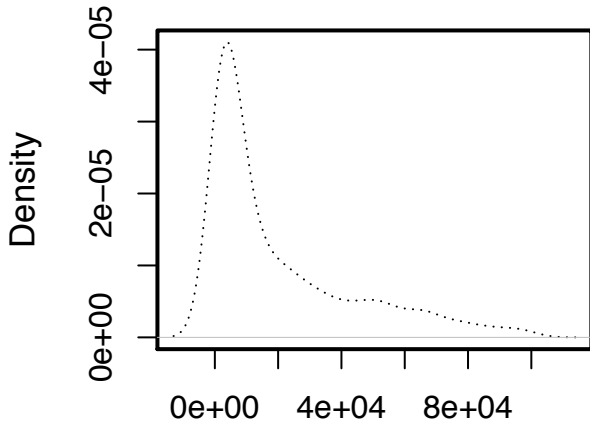

POP\_SIZE2MS\_ANC  
N = 1000 Bandwidth = 4689

### Euclidean distances

N(All / plotted) = 1e+05 / 1000

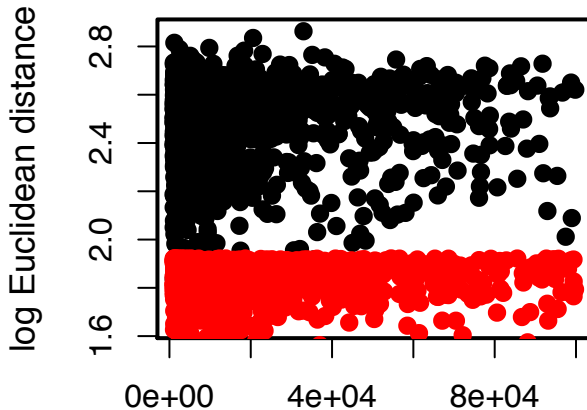

POP\_SIZE2MS\_ANC

### Posterior with "neuralnet"

"rejection" and prior as reference

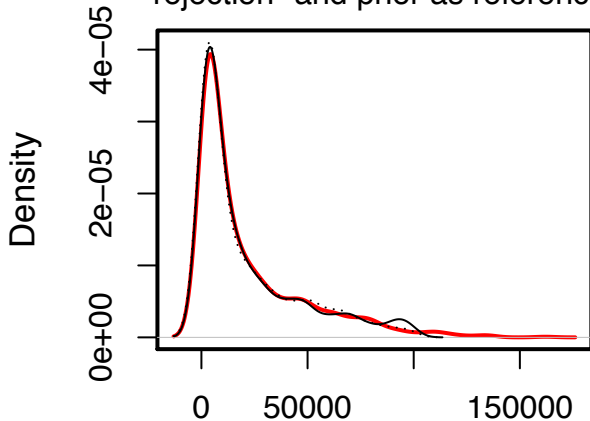

POP\_SIZE2MS\_ANC  
N = 1000 Bandwidth = 4671

### Residuals from nnet()

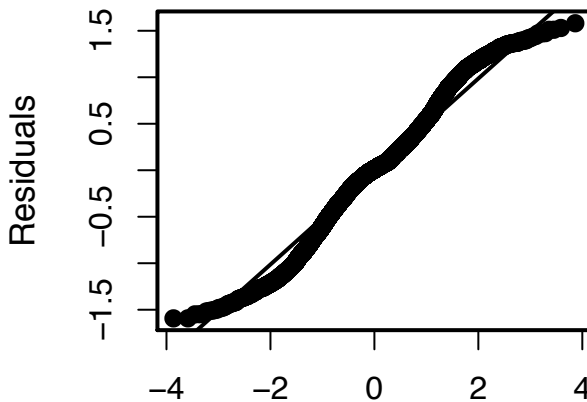

Theoretical quantiles  
Normal Q-Q plot

### Prior

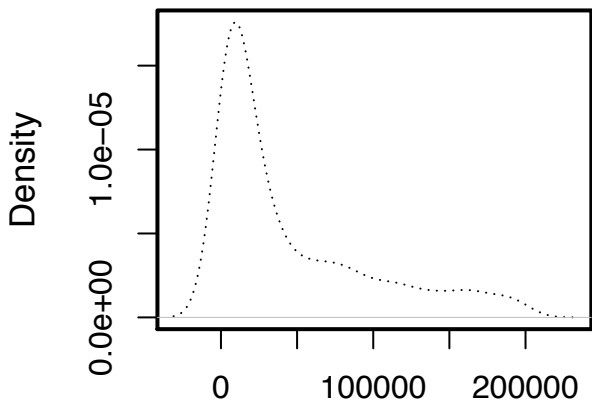

TIME\_SPLIT1\_2

N = 1000 Bandwidth = 1.105e+04

### Euclidean distances

N(All / plotted) = 1e+05 / 1000

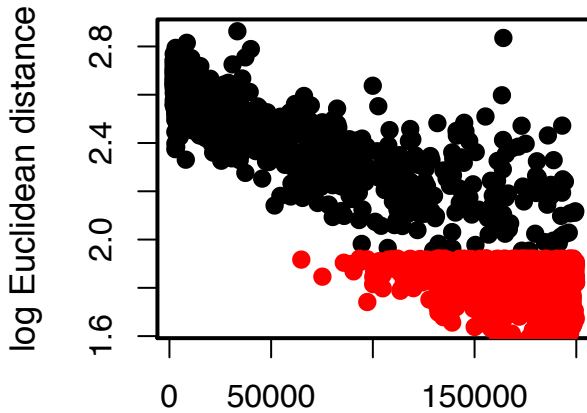

TIME\_SPLIT1\_2

### Posterior with "neuralnet"

"rejection" and prior as reference

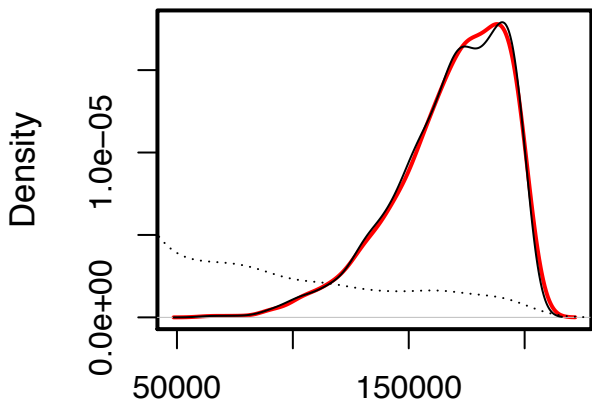

TIME\_SPLIT1\_2

N = 1000 Bandwidth = 5396

### Residuals from nnet()

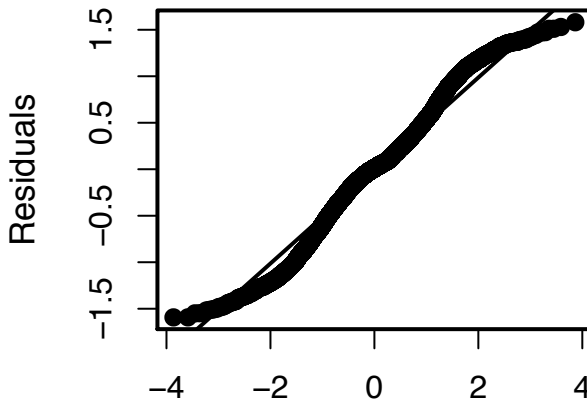

Theoretical quantiles

Normal Q-Q plot

Scenario 5: isolation following divergence,  
with one migration rate since secondary contact,

$M_C$

### Prior

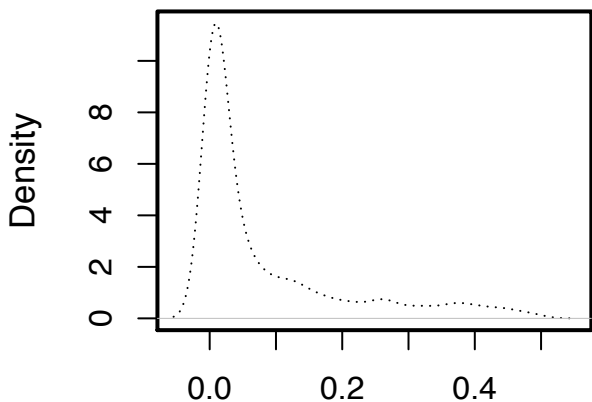

MIGR1\_2C

N = 1000 Bandwidth = 0.01853

### Euclidean distances

N(All / plotted) = 1e+05 / 1000

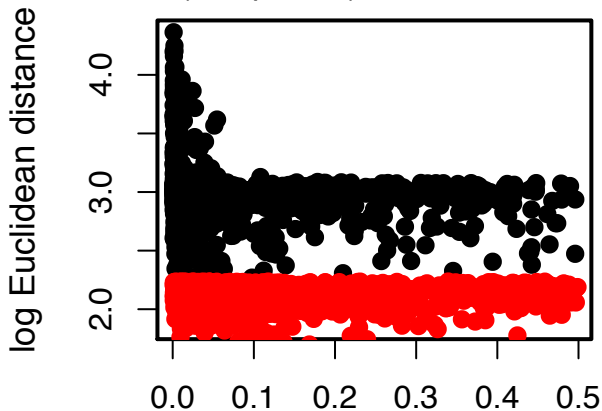

MIGR1\_2C

### Posterior with "neuralnet"

"rejection" and prior as reference

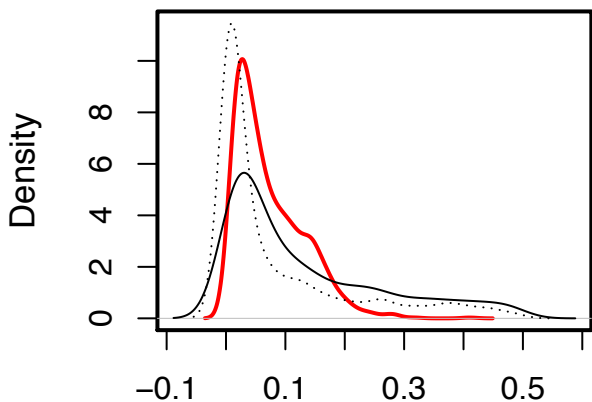

MIGR1\_2C

N = 1000 Bandwidth = 0.01298

### Residuals from nnet()

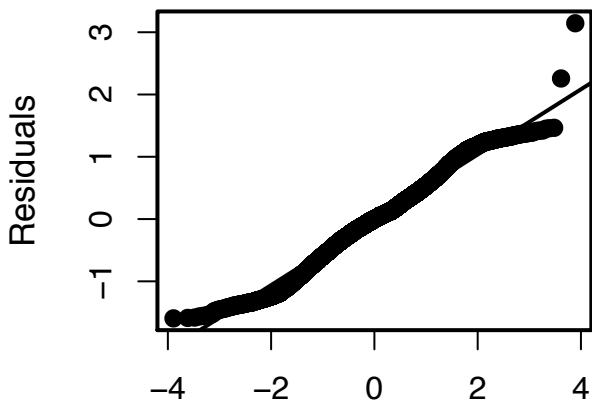

Theoretical quantiles

Normal Q-Q plot

### Prior

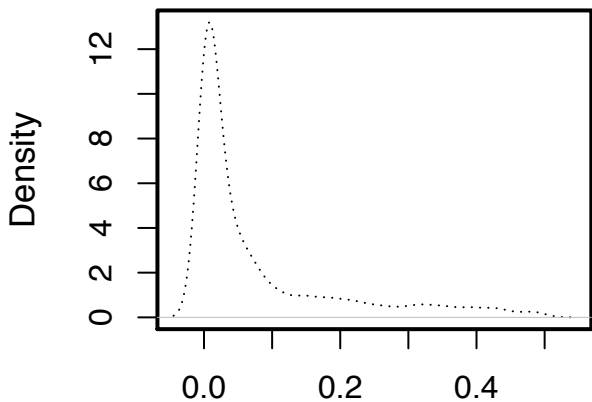

MIGR2\_1C

N = 1000 Bandwidth = 0.01525

### Euclidean distances

N(All / plotted) = 1e+05 / 1000

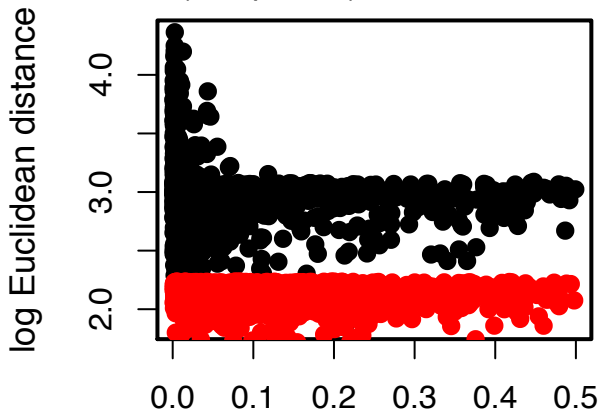

MIGR2\_1C

### Posterior with "neuralnet"

"rejection" and prior as reference

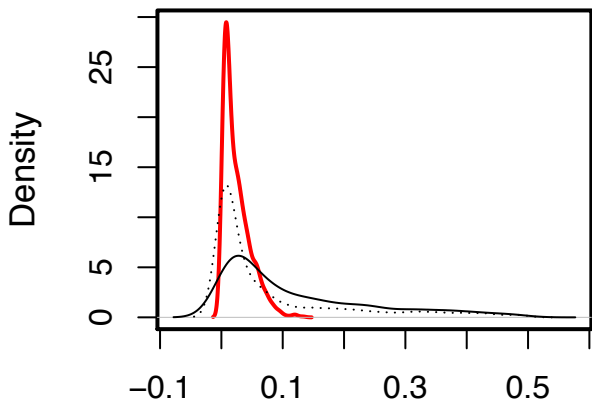

MIGR2\_1C

N = 1000 Bandwidth = 0.004781

### Residuals from nnet()

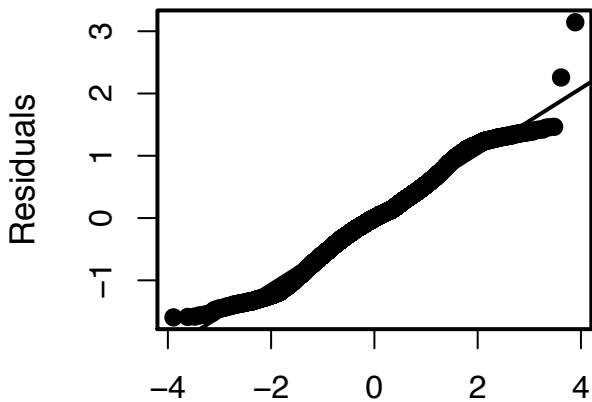

Theoretical quantiles

Normal Q-Q plot



### Prior

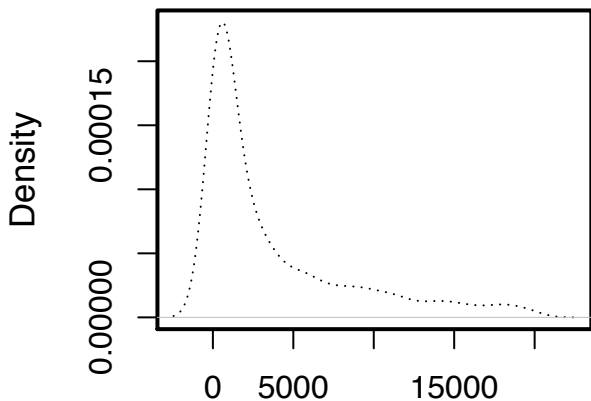

POP\_SIZE1MS

N = 1000 Bandwidth = 849.5

### Euclidean distances

N(All / plotted) = 1e+05 / 1000

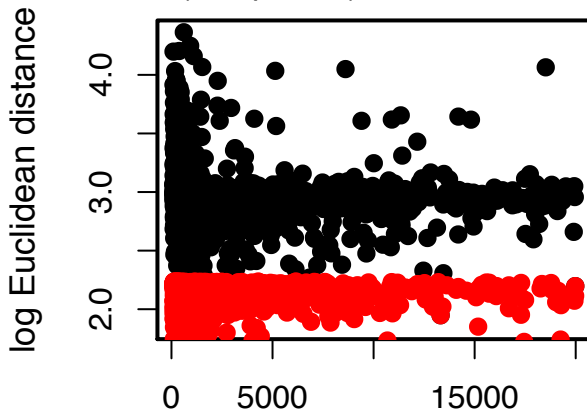

POP\_SIZE1MS

### Posterior with "neuralnet"

"rejection" and prior as reference

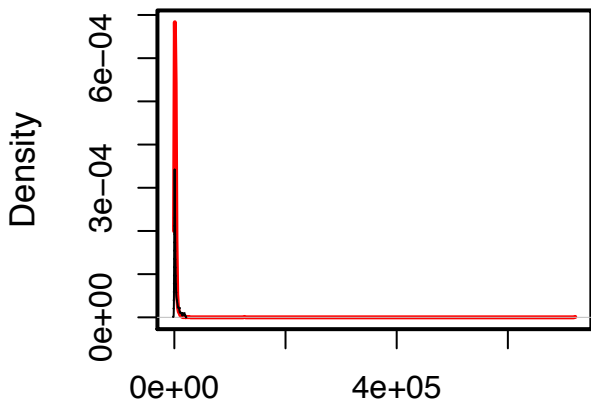

POP\_SIZE1MS

N = 1000 Bandwidth = 231.5

### Residuals from nnet()

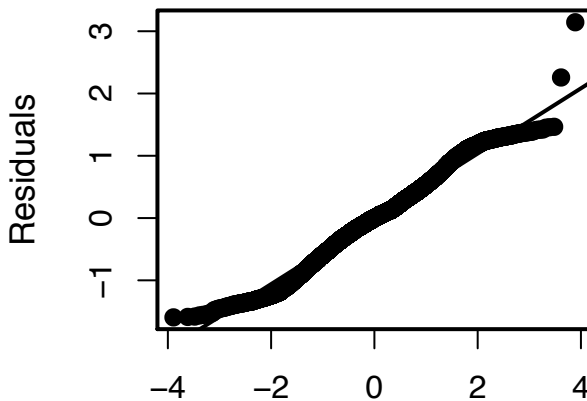

Theoretical quantiles

Normal Q-Q plot

### Prior

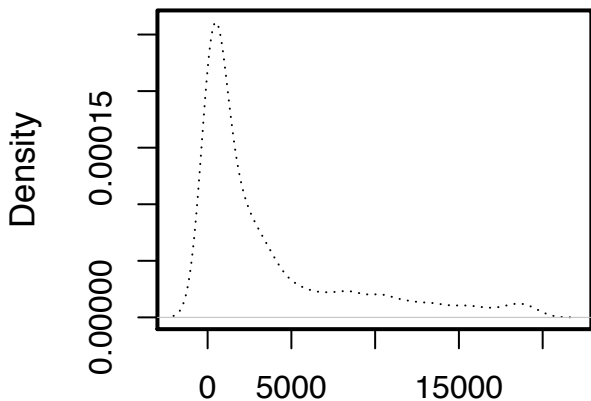

### Euclidean distances

N(All / plotted) = 1e+05 / 1000

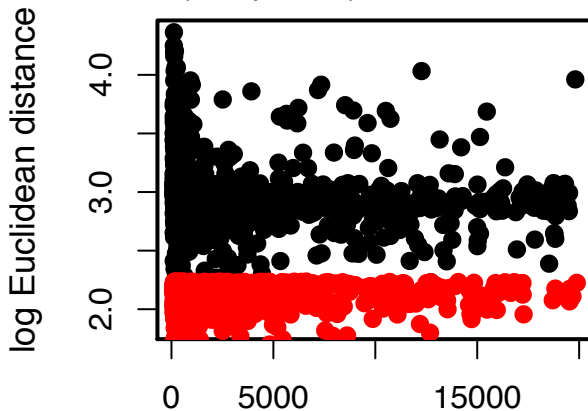

### Posterior with "neuralnet"

"rejection" and prior as reference

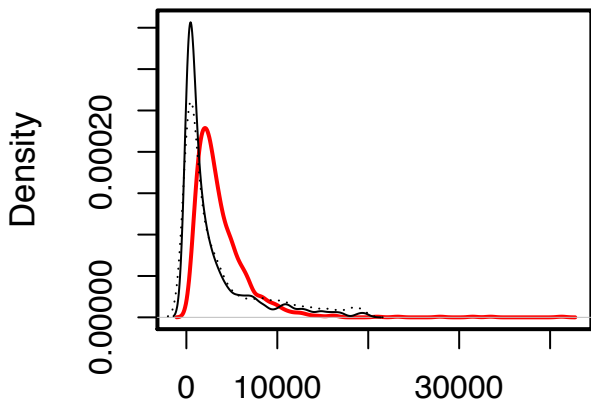

### Residuals from nnet()

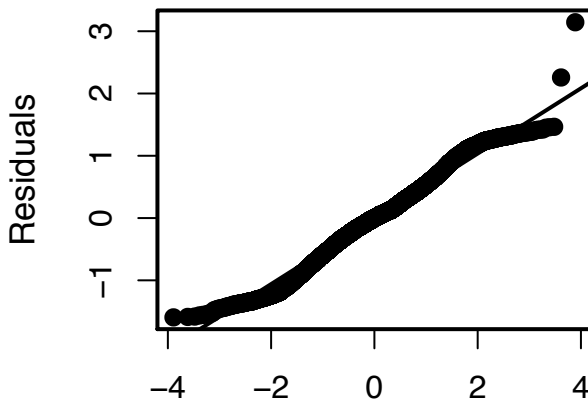

### Prior

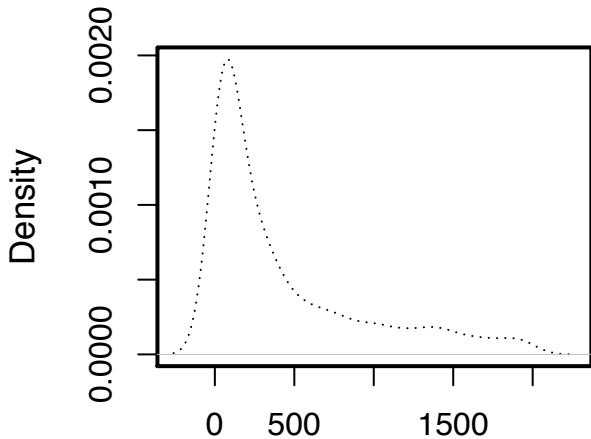

### Euclidean distances

N(All / plotted) = 1e+05 / 1000

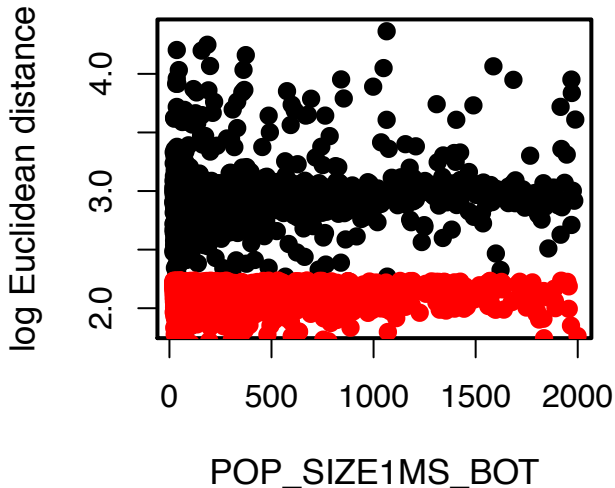

### Posterior with "neuralnet"

"rejection" and prior as reference

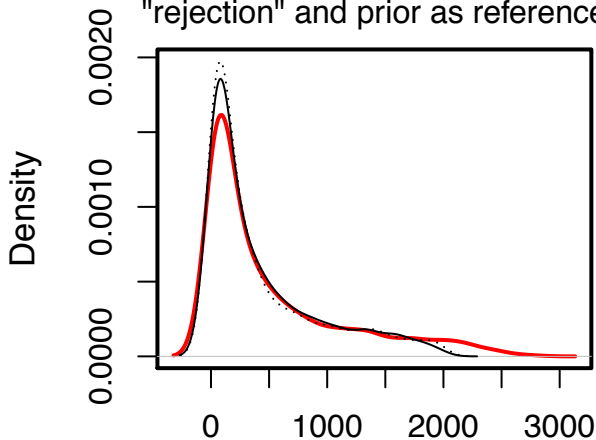

### Residuals from nnet()

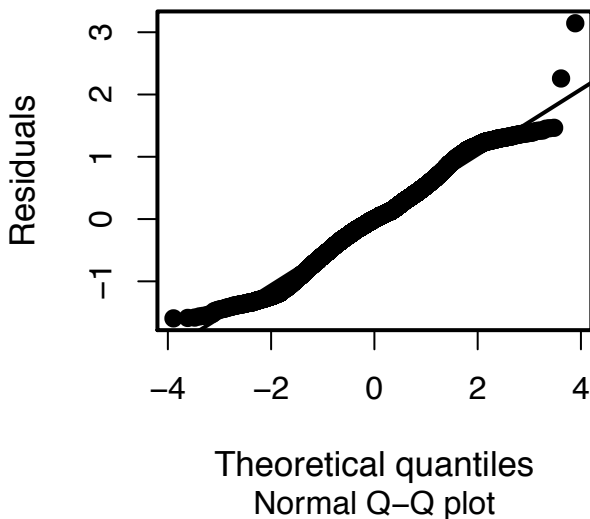

### Prior

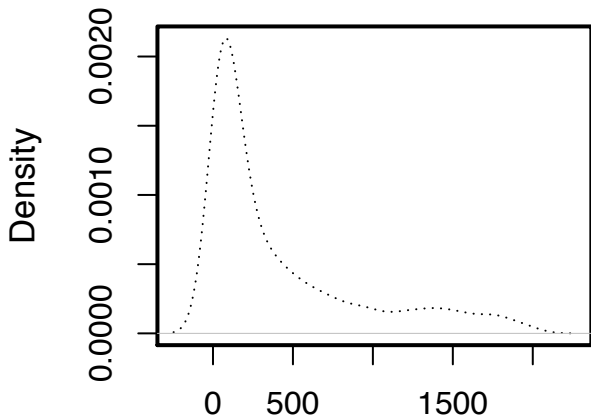

POP\_SIZE2MS\_BOT  
N = 1000 Bandwidth = 88.99

### Euclidean distances

N(All / plotted) = 1e+05 / 1000

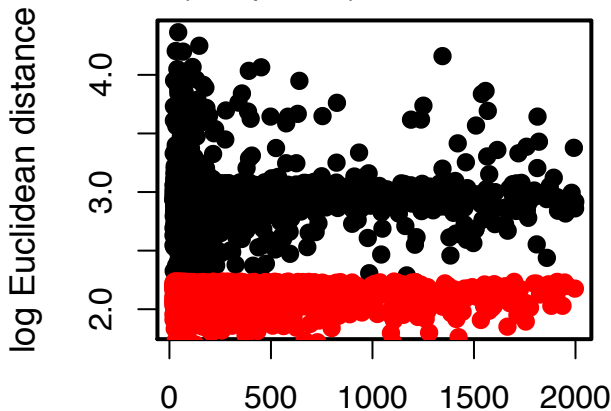

POP\_SIZE2MS\_BOT

### Posterior with "neuralnet"

"rejection" and prior as reference

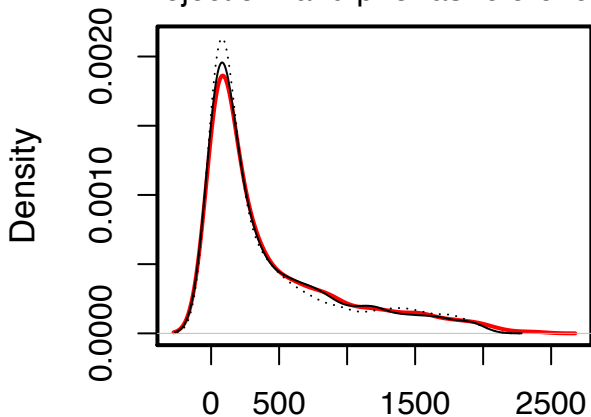

POP\_SIZE2MS\_BOT  
N = 1000 Bandwidth = 99.03

### Residuals from nnet()

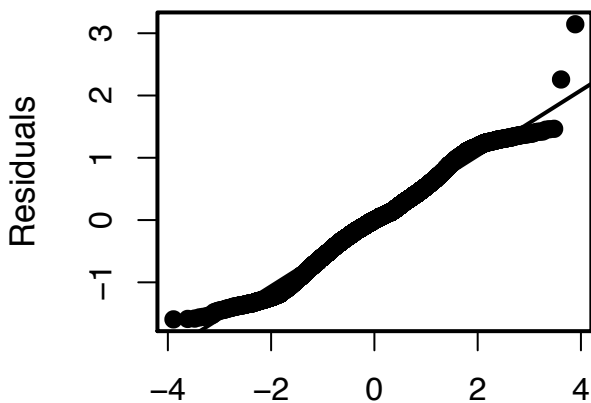

Theoretical quantiles  
Normal Q-Q plot

### Prior

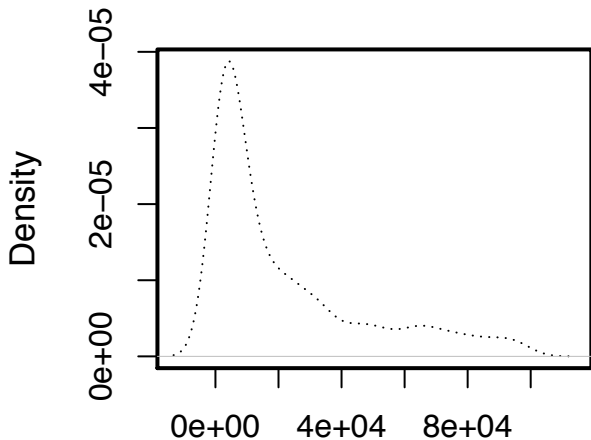

POP\_SIZE1MS\_ANC  
N = 1000 Bandwidth = 4768

### Euclidean distances

N(All / plotted) = 1e+05 / 1000

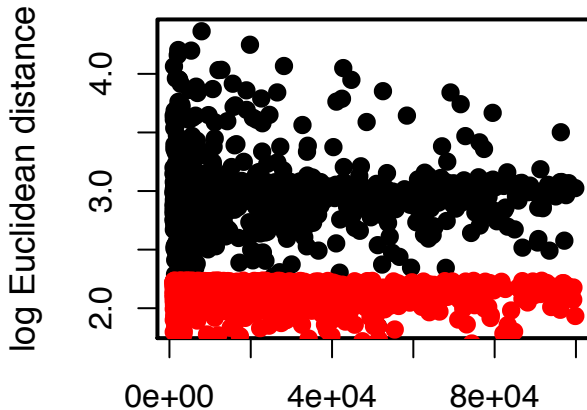

POP\_SIZE1MS\_ANC

### Posterior with "neuralnet"

"rejection" and prior as reference

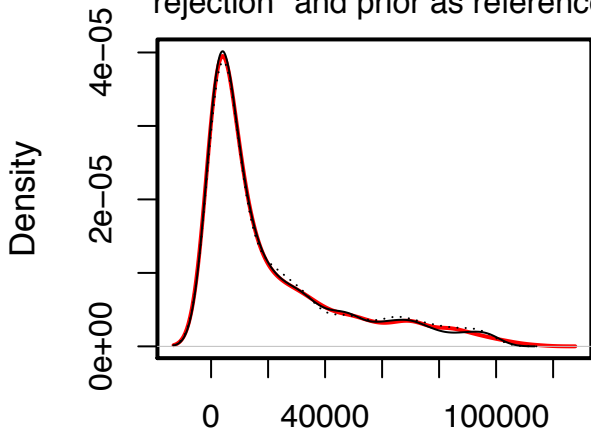

POP\_SIZE1MS\_ANC  
N = 1000 Bandwidth = 4708

### Residuals from nnet()

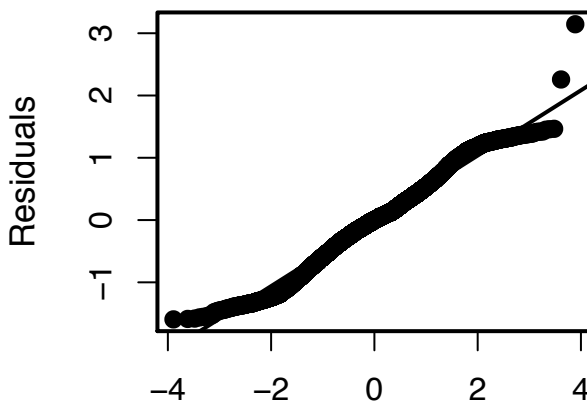

Theoretical quantiles  
Normal Q-Q plot

### Prior

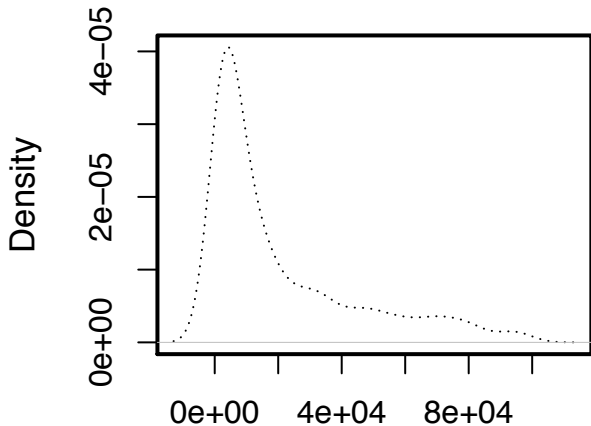

POP\_SIZE2MS\_ANC  
N = 1000 Bandwidth = 4660

### Euclidean distances

N(All / plotted) = 1e+05 / 1000

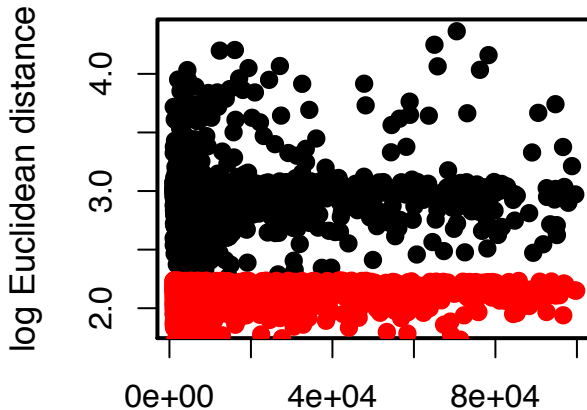

POP\_SIZE2MS\_ANC

### Posterior with "neuralnet"

"rejection" and prior as reference

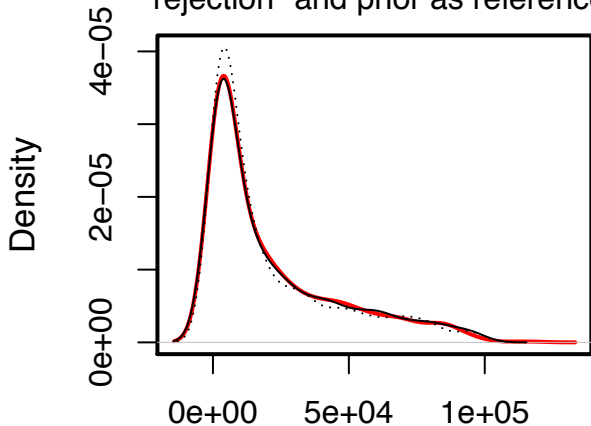

POP\_SIZE2MS\_ANC  
N = 1000 Bandwidth = 5074

### Residuals from nnet()

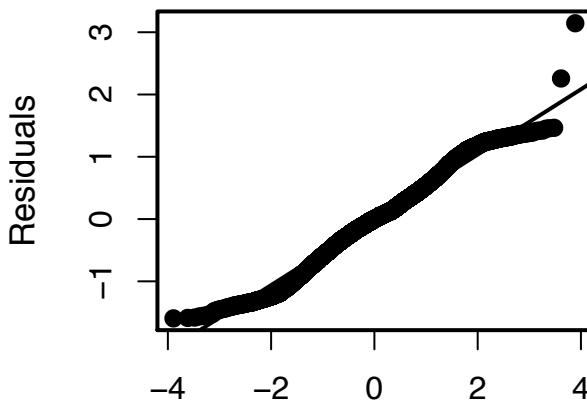

Theoretical quantiles  
Normal Q-Q plot

### Prior

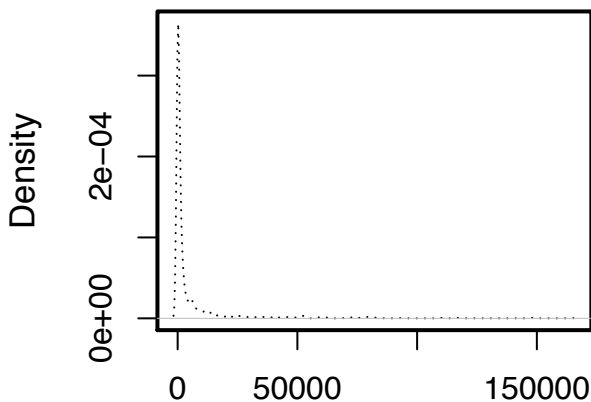

CONTACT

N = 1000 Bandwidth = 578.6

### Euclidean distances

N(All / plotted) = 1e+05 / 1000

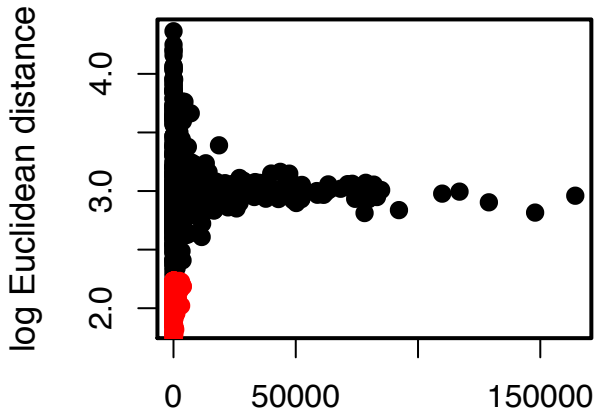

CONTACT

### Posterior with "neuralnet"

"rejection" and prior as reference

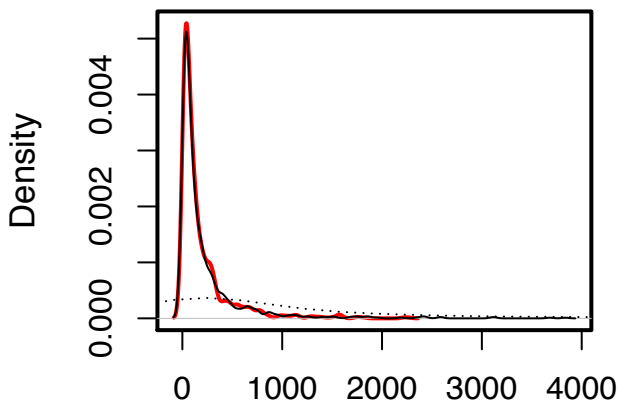

CONTACT

N = 1000 Bandwidth = 31.87

### Residuals from nnet()

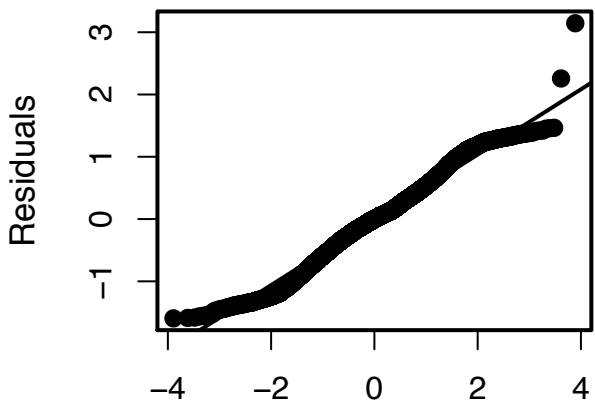

Theoretical quantiles

Normal Q-Q plot

### Prior

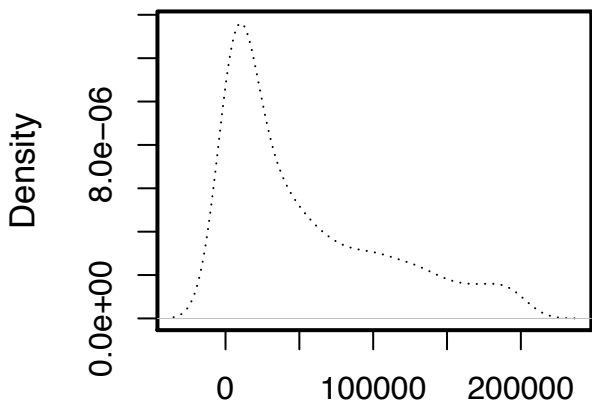

TIME\_SPLIT1\_2

N = 1000 Bandwidth = 1.241e+04

### Euclidean distances

N(All / plotted) = 1e+05 / 1000

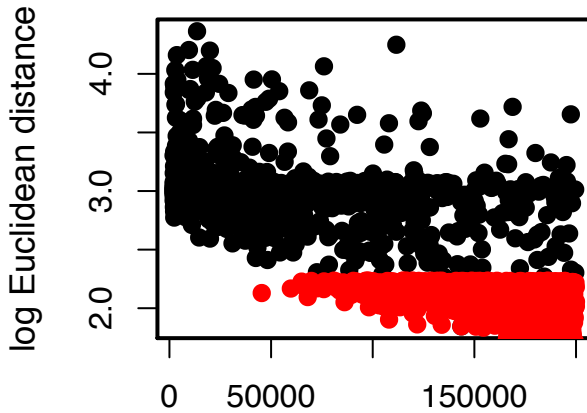

TIME\_SPLIT1\_2

### Posterior with "neuralnet"

"rejection" and prior as reference

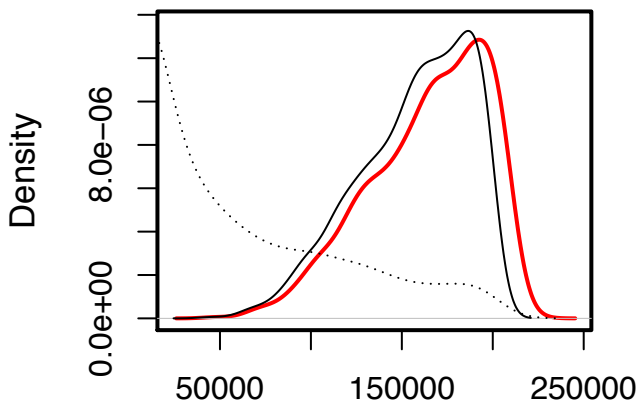

TIME\_SPLIT1\_2

N = 1000 Bandwidth = 7292

### Residuals from nnet()

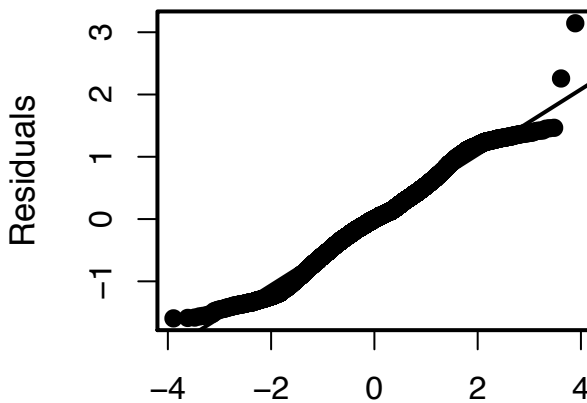

Theoretical quantiles

Normal Q-Q plot



Scenario 6: isolation following divergence,  
with two migration rates: one since secondary  
contact,  $M_C$ , and one since the whaling era,  $M_W$

**Prior**

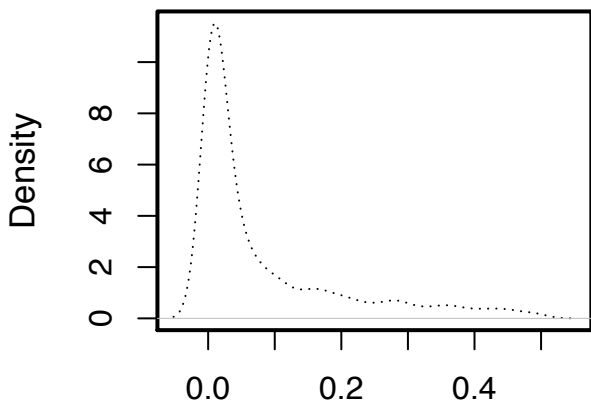

MIGR1\_2C

N = 1000 Bandwidth = 0.01769

**Euclidean distances**

N(All / plotted) = 1e+05 / 1000

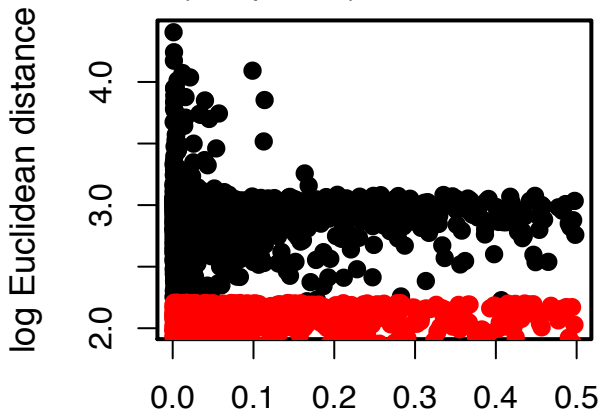

MIGR1\_2C

**Posterior with "neuralnet"**

"rejection" and prior as reference

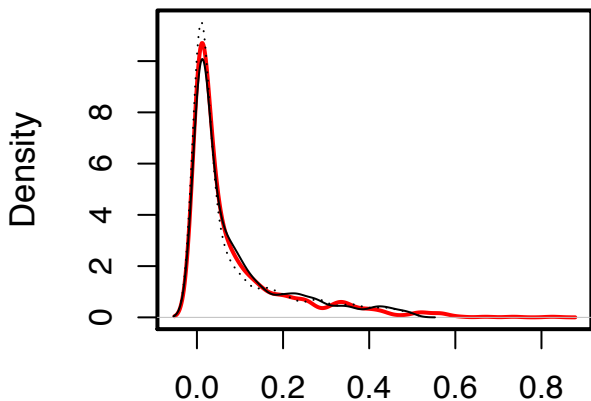

MIGR1\_2C

N = 1000 Bandwidth = 0.0176

**Residuals from nnet()**

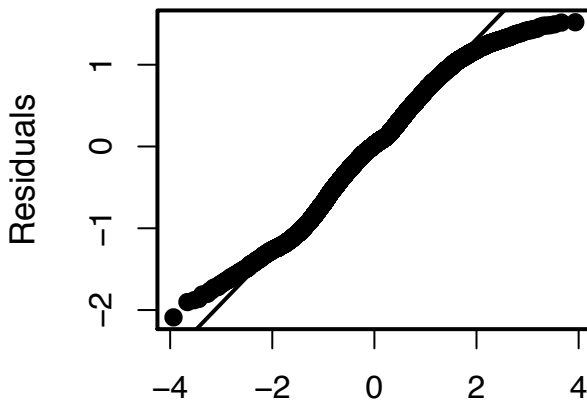

Theoretical quantiles

Normal Q-Q plot

### Prior

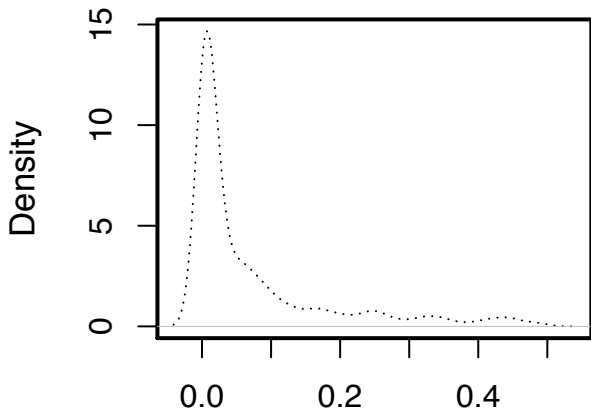

MIGR2\_1C

N = 1000 Bandwidth = 0.0141

### Euclidean distances

N(All / plotted) = 1e+05 / 1000

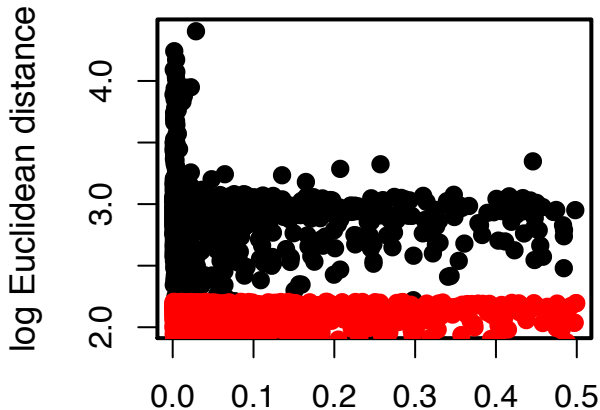

MIGR2\_1C

### Posterior with "neuralnet"

"rejection" and prior as reference

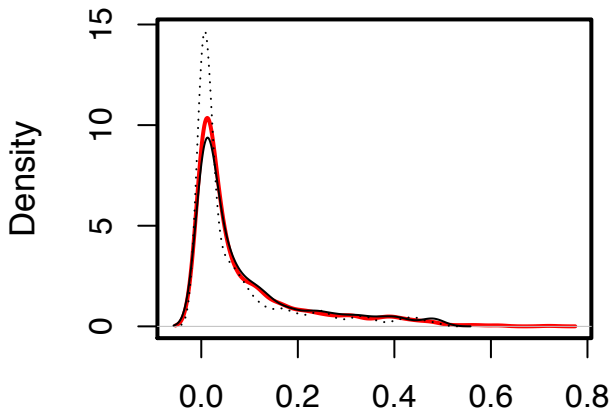

MIGR2\_1C

N = 1000 Bandwidth = 0.01803

### Residuals from nnet()

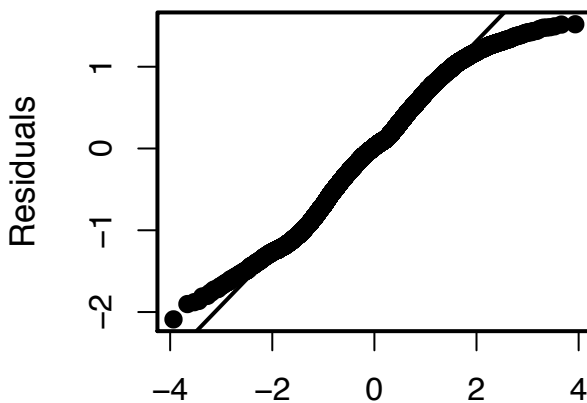

Theoretical quantiles

Normal Q-Q plot

### Prior

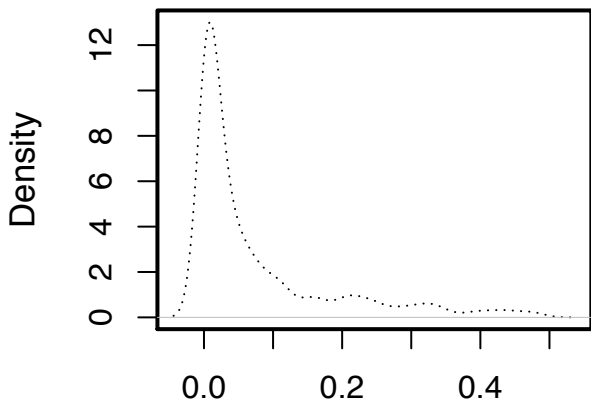

MIGR1\_2W

N = 1000 Bandwidth = 0.01502

### Euclidean distances

N(All / plotted) = 1e+05 / 1000

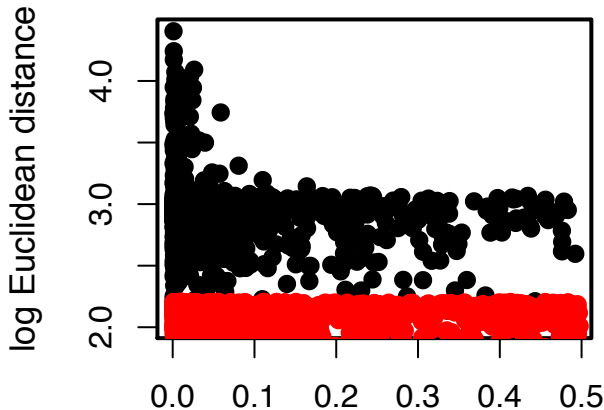

MIGR1\_2W

### Posterior with "neuralnet"

"rejection" and prior as reference

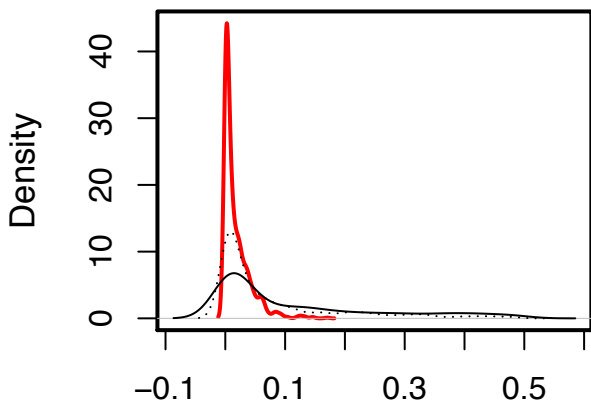

MIGR1\_2W

N = 1000 Bandwidth = 0.003985

### Residuals from nnet()

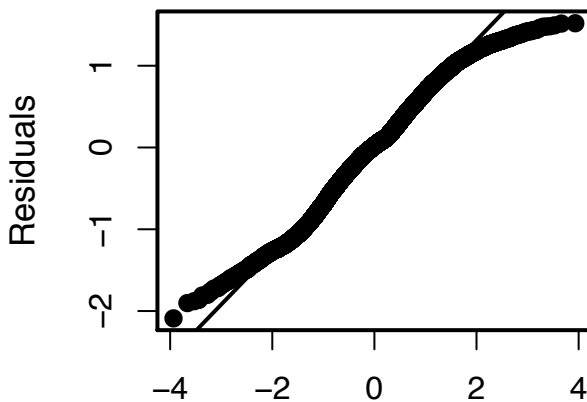

Theoretical quantiles

Normal Q-Q plot

### Prior

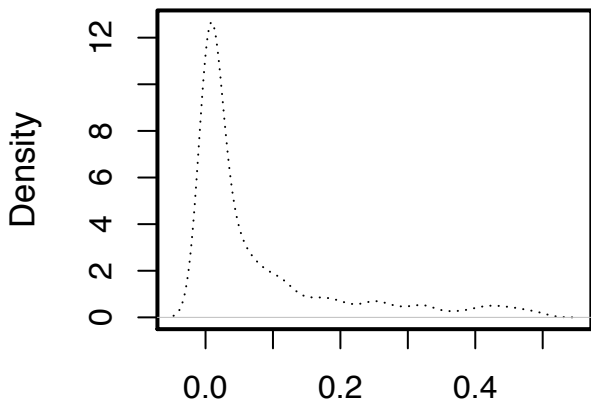

MIGR2\_1W

N = 1000 Bandwidth = 0.01617

### Euclidean distances

N(All / plotted) = 1e+05 / 1000

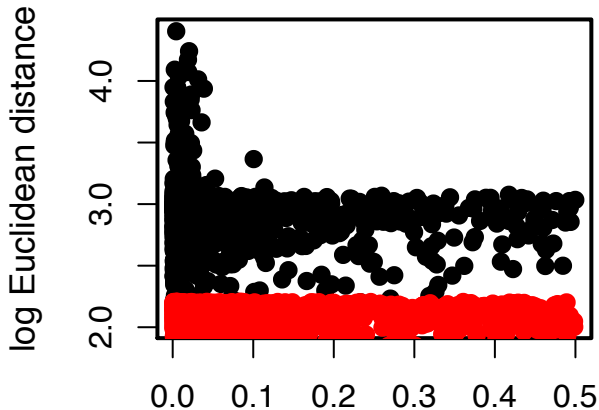

MIGR2\_1W

### Posterior with "neuralnet"

"rejection" and prior as reference

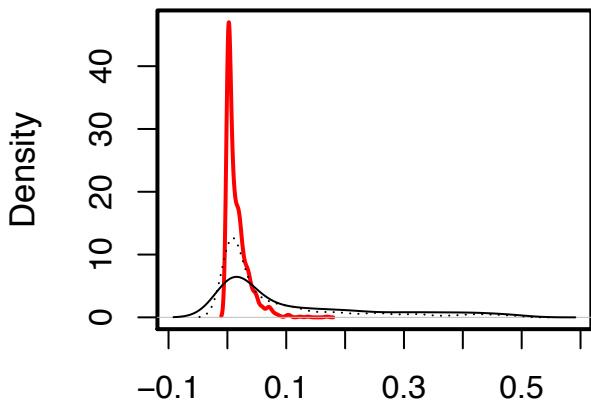

MIGR2\_1W

N = 1000 Bandwidth = 0.00352

### Residuals from nnet()



Theoretical quantiles

Normal Q-Q plot

### Prior

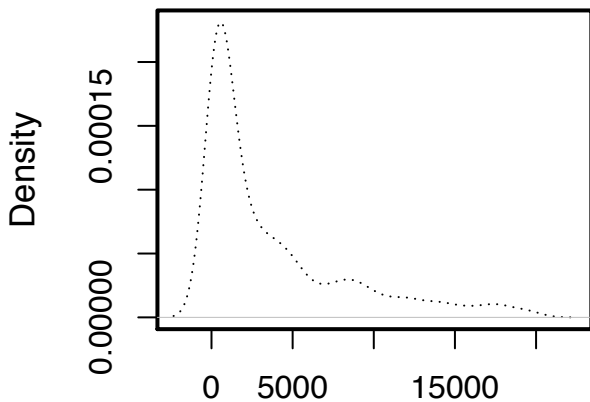

### Euclidean distances

N(All / plotted) = 1e+05 / 1000

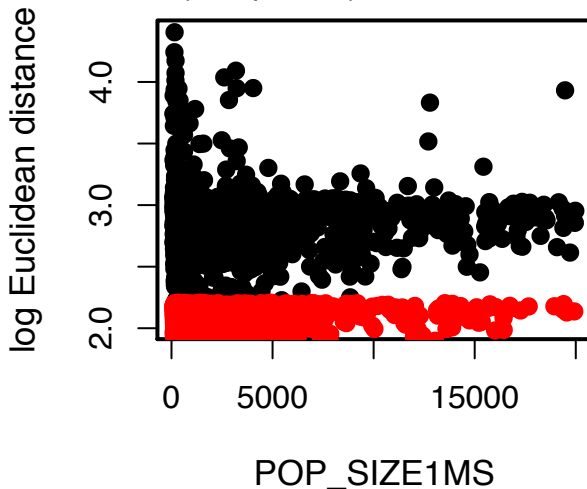

### Posterior with "neuralnet"

"rejection" and prior as reference

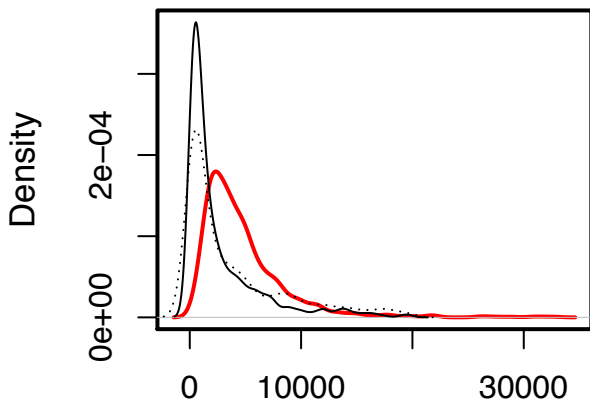

### Residuals from nnet()

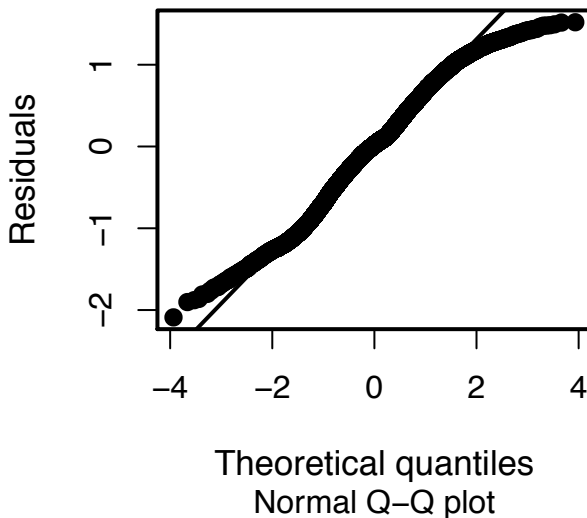

### Prior

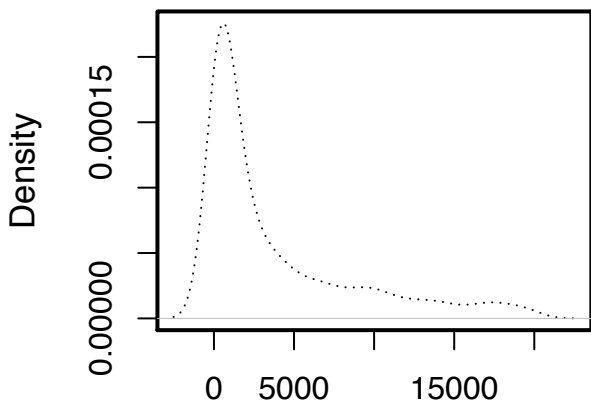

### Euclidean distances

N(All / plotted) = 1e+05 / 1000

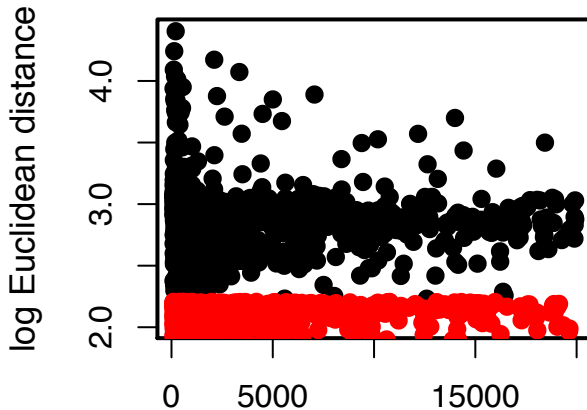

### Posterior with "neuralnet"

"rejection" and prior as reference

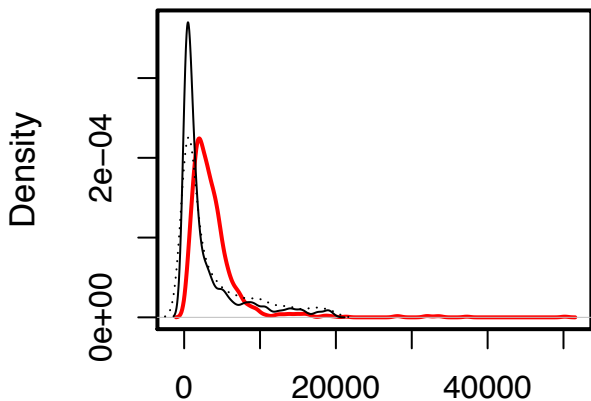

### Residuals from nnet()



### Prior

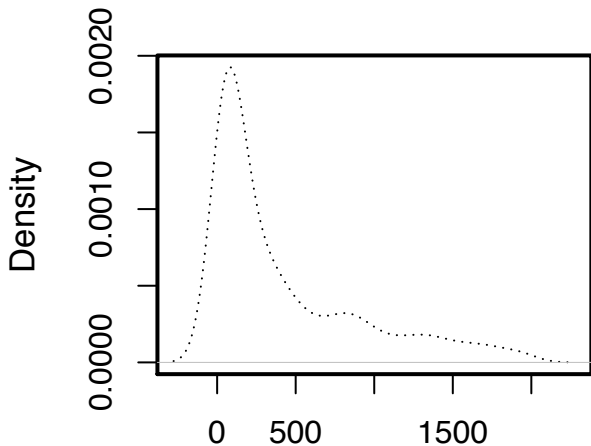

POP\_SIZE1MS\_BOT  
N = 1000 Bandwidth = 99.24

### Euclidean distances

N(All / plotted) = 1e+05 / 1000

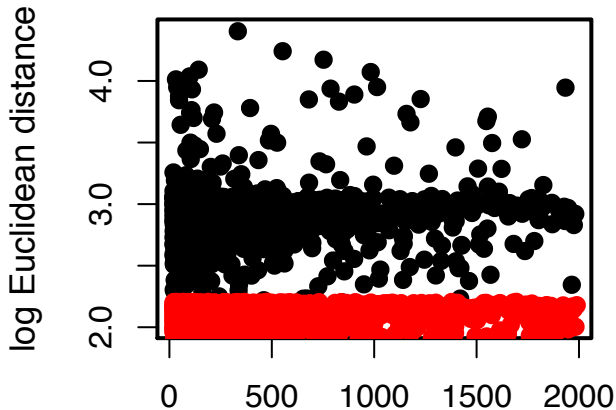

POP\_SIZE1MS\_BOT

### Posterior with "neuralnet"

"rejection" and prior as reference

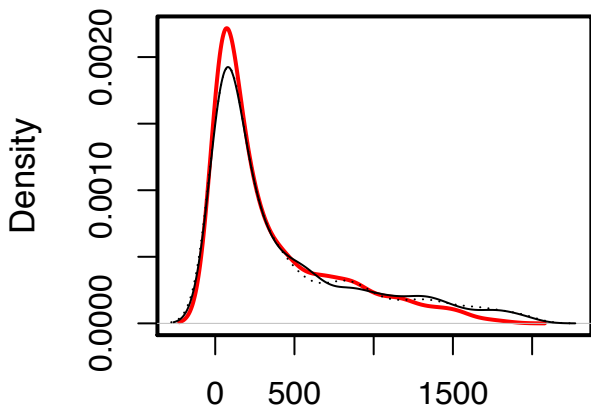

POP\_SIZE1MS\_BOT  
N = 1000 Bandwidth = 81.43

### Residuals from nnet()



Theoretical quantiles  
Normal Q-Q plot



### Prior

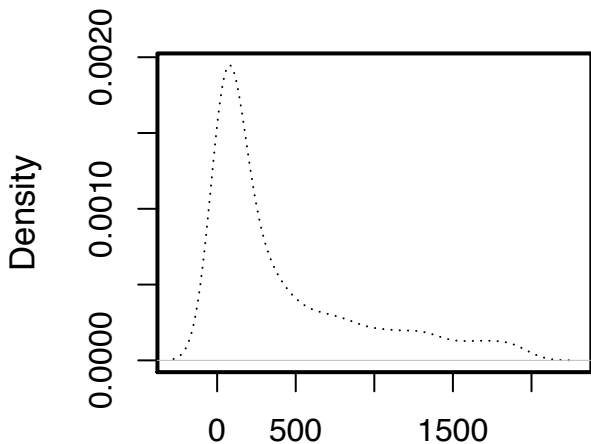

POP\_SIZE2MS\_BOT  
N = 1000 Bandwidth = 99.24

### Euclidean distances

N(All / plotted) = 1e+05 / 1000

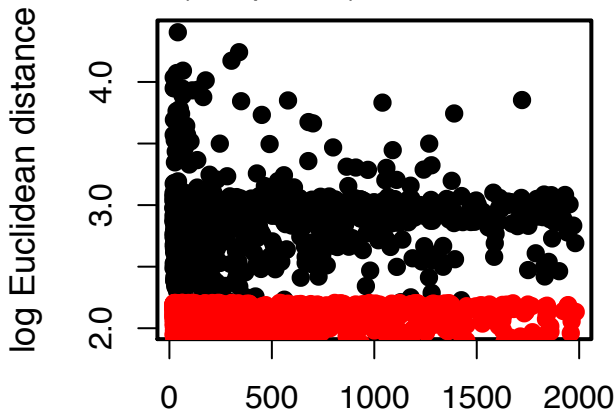

POP\_SIZE2MS\_BOT

### Posterior with "neuralnet"

"rejection" and prior as reference

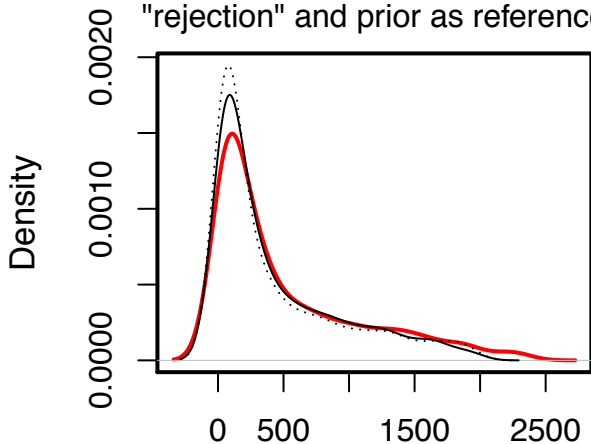

POP\_SIZE2MS\_BOT  
N = 1000 Bandwidth = 120.1

### Residuals from nnet()



Theoretical quantiles  
Normal Q-Q plot

### Prior

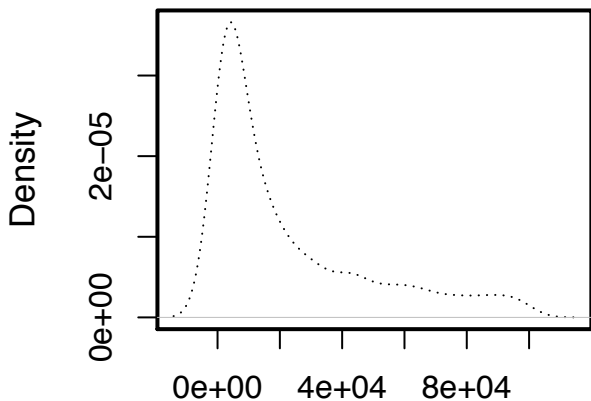

### Euclidean distances

N(All / plotted) = 1e+05 / 1000

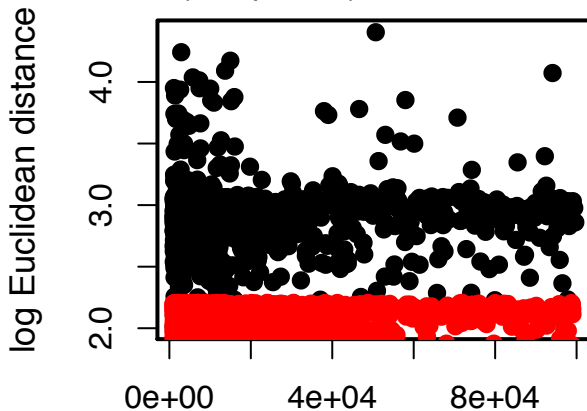

### Posterior with "neuralnet"

"rejection" and prior as reference

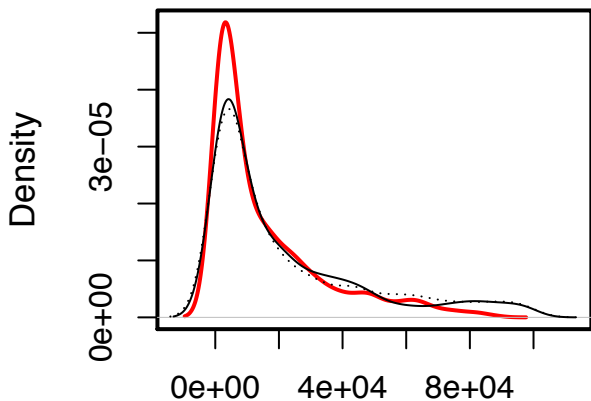

### Residuals from nnet()



### Prior

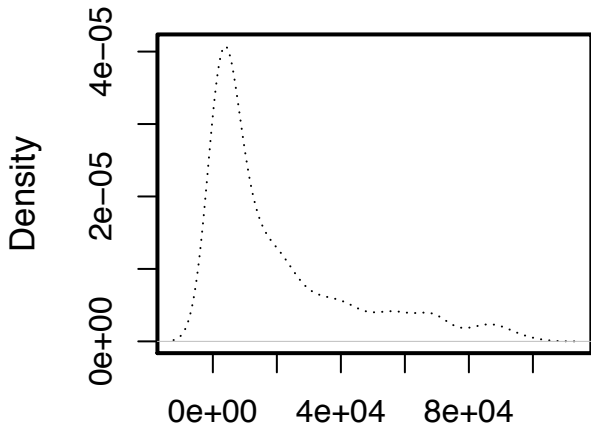

POP\_SIZE2MS\_ANC  
N = 1000 Bandwidth = 4434

### Euclidean distances

N(All / plotted) = 1e+05 / 1000

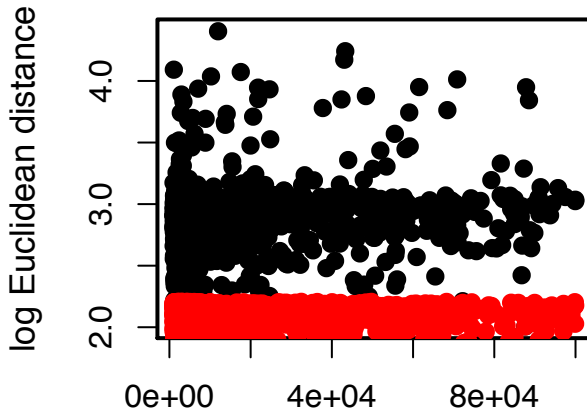

POP\_SIZE2MS\_ANC

### Posterior with "neuralnet"

"rejection" and prior as reference

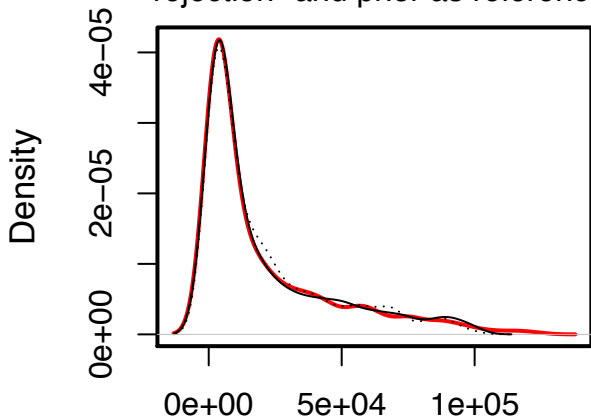

POP\_SIZE2MS\_ANC  
N = 1000 Bandwidth = 4647

### Residuals from nnet()



Theoretical quantiles  
Normal Q-Q plot

### Prior

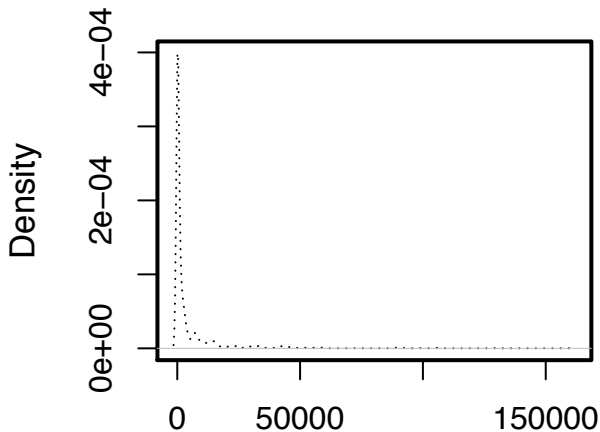

CONTACT

N = 1000 Bandwidth = 514.1

### Euclidean distances

N(All / plotted) = 1e+05 / 1000

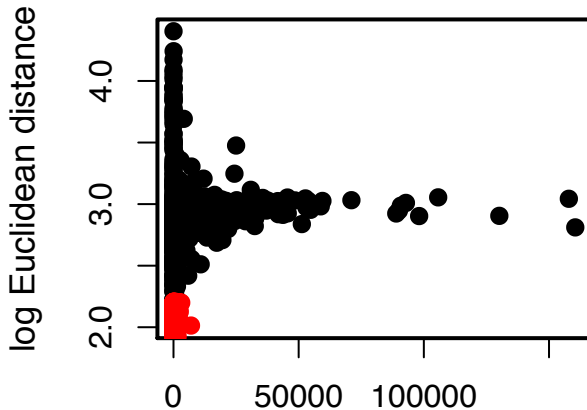

CONTACT

### Posterior with "neuralnet"

"rejection" and prior as reference

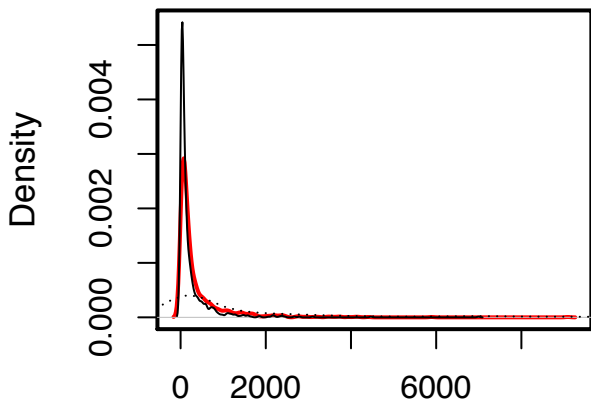

CONTACT

N = 1000 Bandwidth = 59.15

### Residuals from nnet()



Theoretical quantiles

Normal Q-Q plot

### Prior

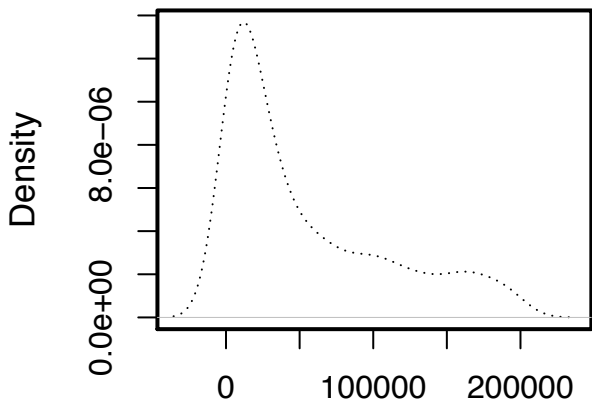

TIME\_SPLIT1\_2

N = 1000 Bandwidth = 1.255e+04

### Euclidean distances

N(All / plotted) = 1e+05 / 1000

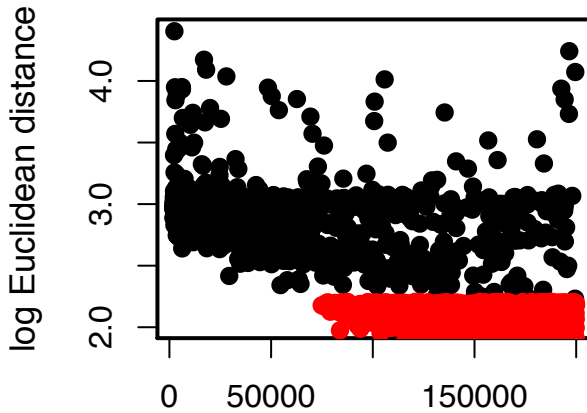

TIME\_SPLIT1\_2

### Posterior with "neuralnet"

"rejection" and prior as reference

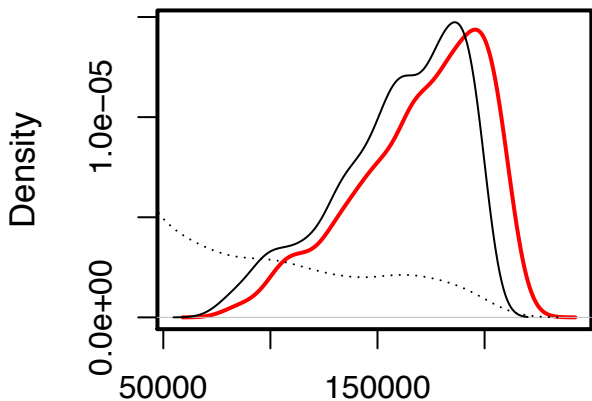

TIME\_SPLIT1\_2

N = 1000 Bandwidth = 6793

### Residuals from nnet()



Theoretical quantiles

Normal Q-Q plot

Scenario 5NB: isolation following  
divergence, with one migration rate  
since secondary contact,  $M_C$

No whaling bottleneck

### Prior

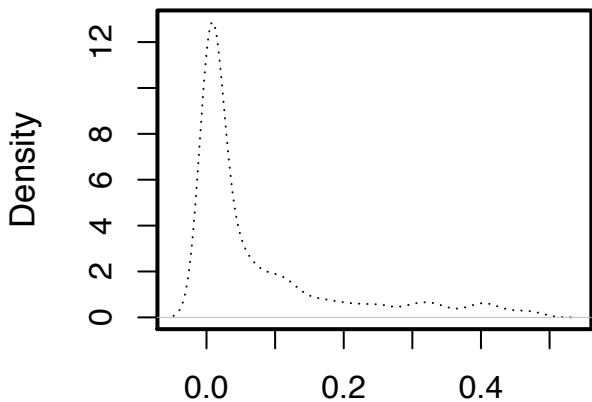

MIGR1\_2C

N = 1000 Bandwidth = 0.01637

### Euclidean distances

N(All / plotted) = 1e+05 / 1000

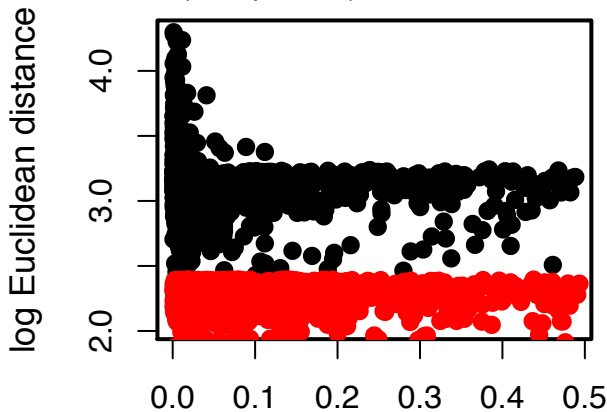

MIGR1\_2C

### Posterior with "neuralnet"

"rejection" and prior as reference

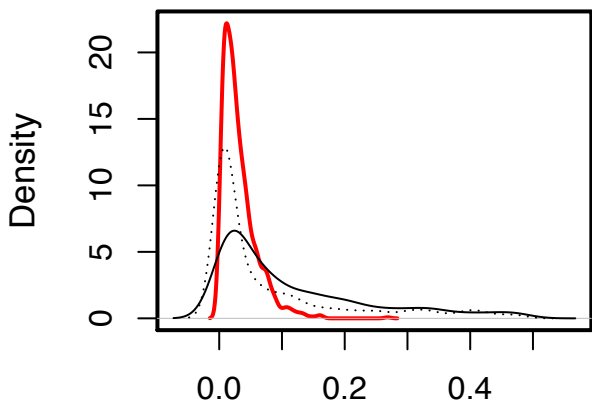

MIGR1\_2C

N = 1000 Bandwidth = 0.005178

### Residuals from nnet()

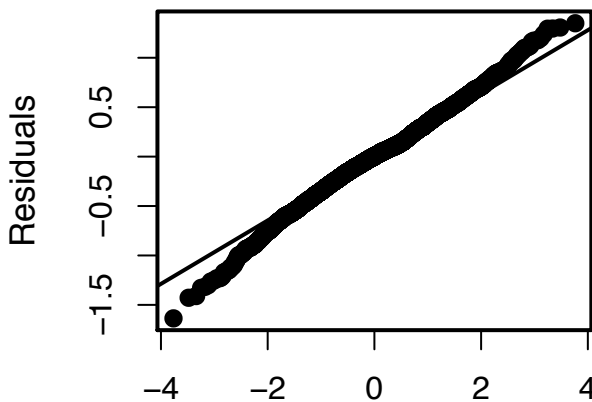

Theoretical quantiles

Normal Q-Q plot

### Prior

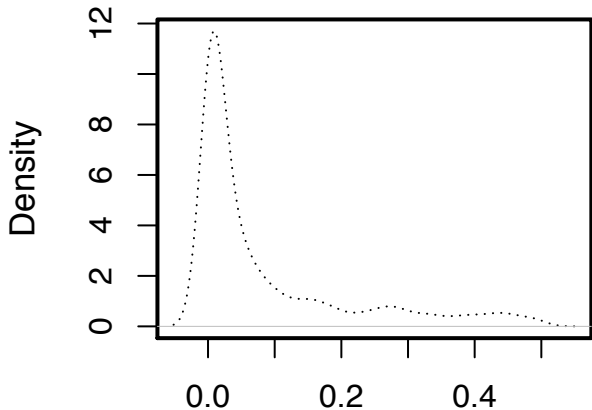

MIGR2\_1C

N = 1000 Bandwidth = 0.01759

### Euclidean distances

N(All / plotted) = 1e+05 / 1000

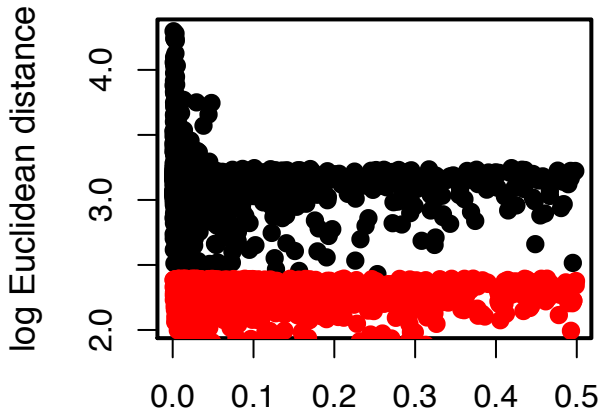

MIGR2\_1C

### Posterior with "neuralnet"

"rejection" and prior as reference

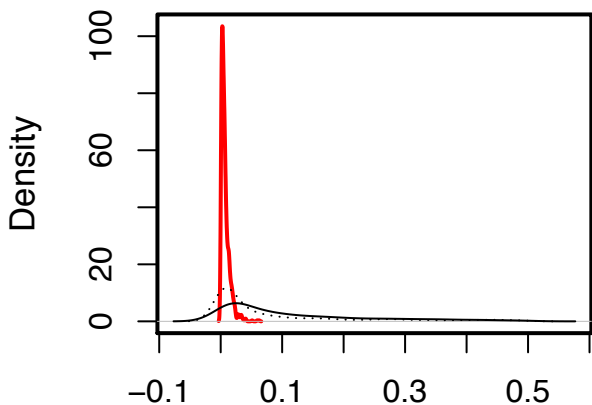

MIGR2\_1C

N = 1000 Bandwidth = 0.001179

### Residuals from nnet()

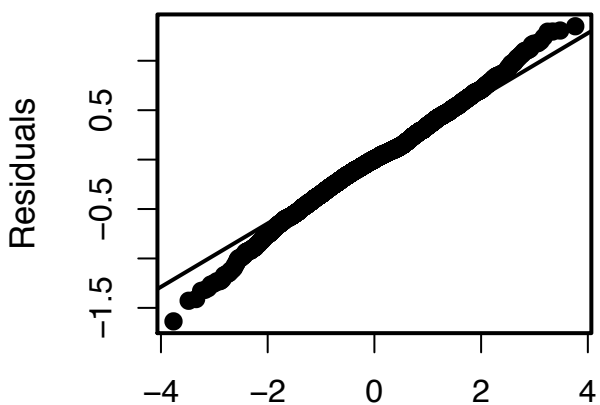

Theoretical quantiles

Normal Q-Q plot



### Prior

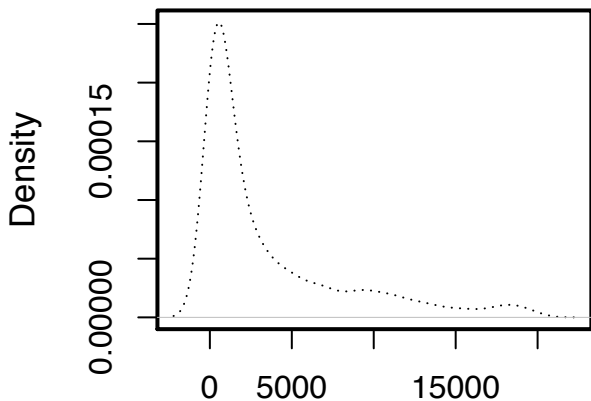

### Euclidean distances

N(All / plotted) = 1e+05 / 1000

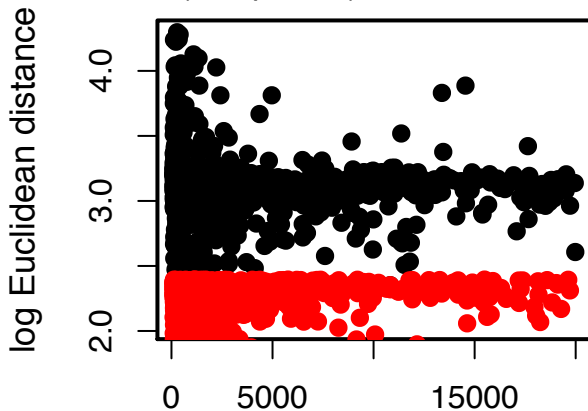

### Posterior with "neuralnet"

"rejection" and prior as reference

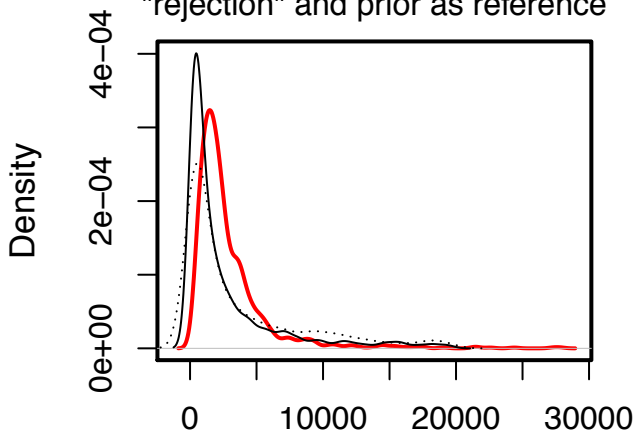

### Residuals from nnet()

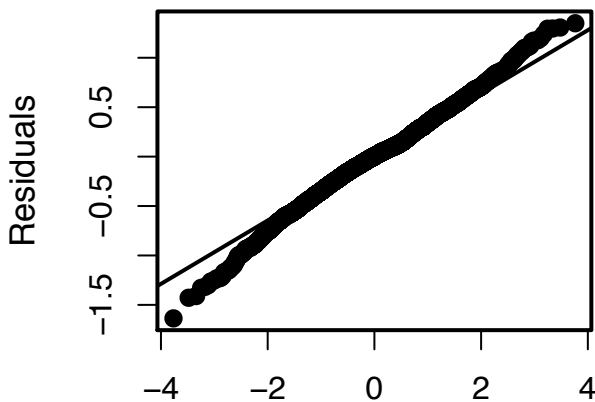

### Prior

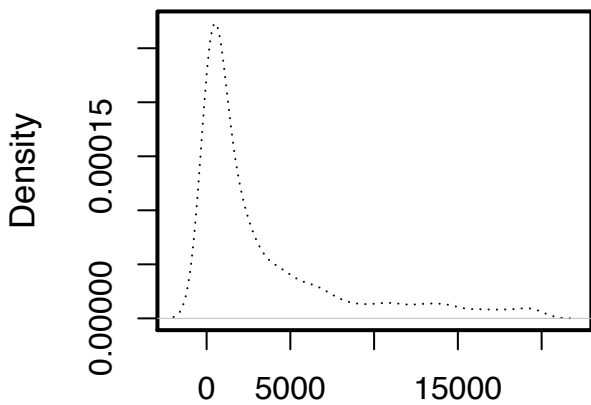

### Euclidean distances

N(All / plotted) = 1e+05 / 1000

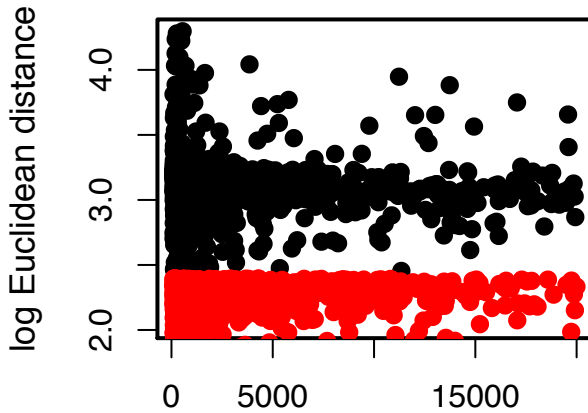

### Posterior with "neuralnet"

"rejection" and prior as reference

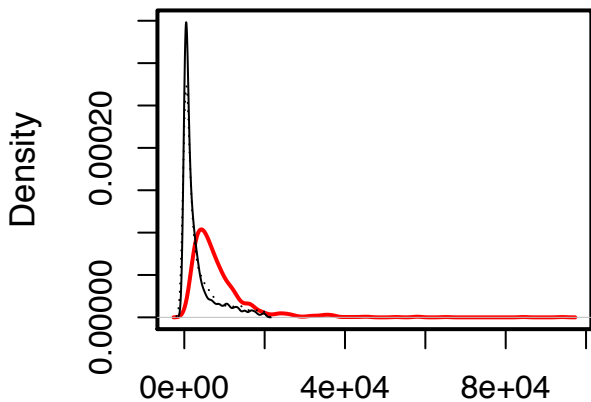

### Residuals from nnet()

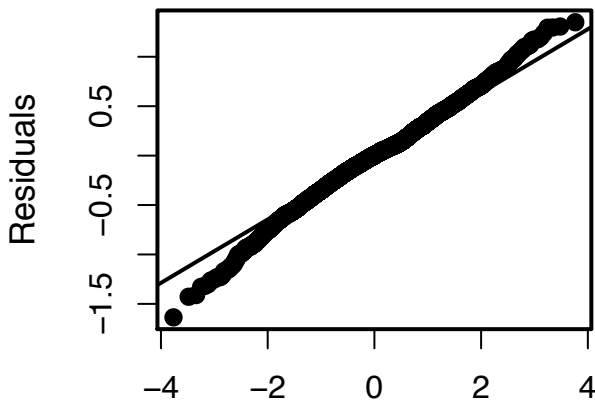

### Prior

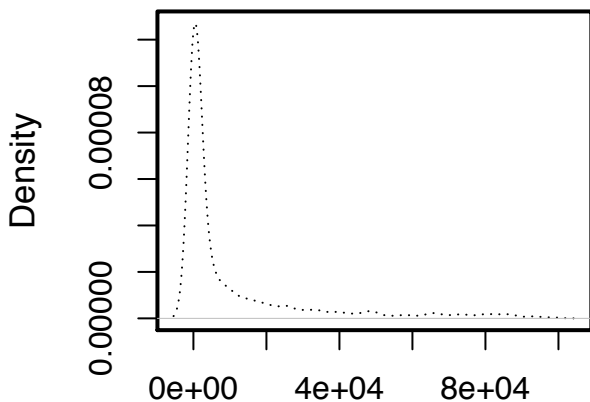

CONTACT

N = 1000 Bandwidth = 1822

### Euclidean distances

N(All / plotted) = 1e+05 / 1000

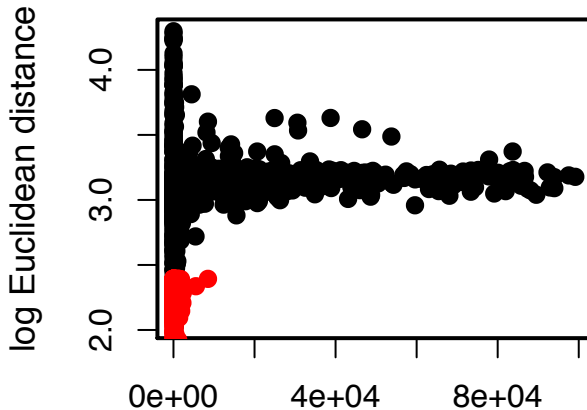

CONTACT

### Posterior with "neuralnet"

"rejection" and prior as reference

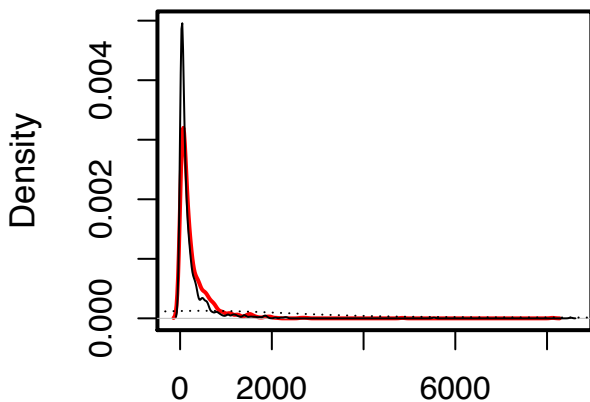

CONTACT

N = 1000 Bandwidth = 51.71

### Residuals from nnet()



### Prior

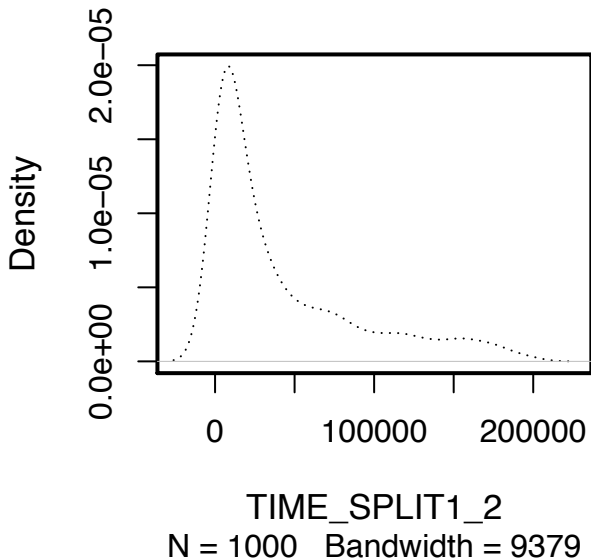

### Euclidean distances

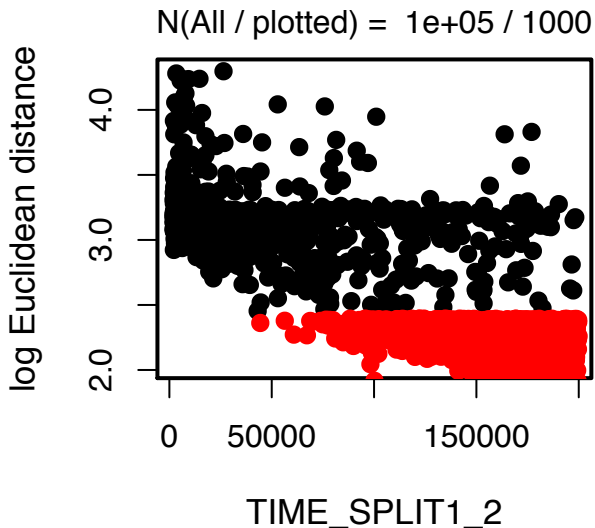

### Posterior with "neuralnet"

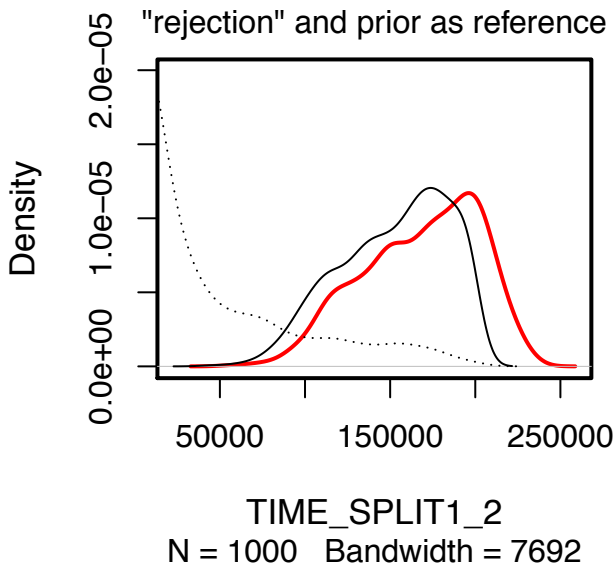

### Residuals from nnet()

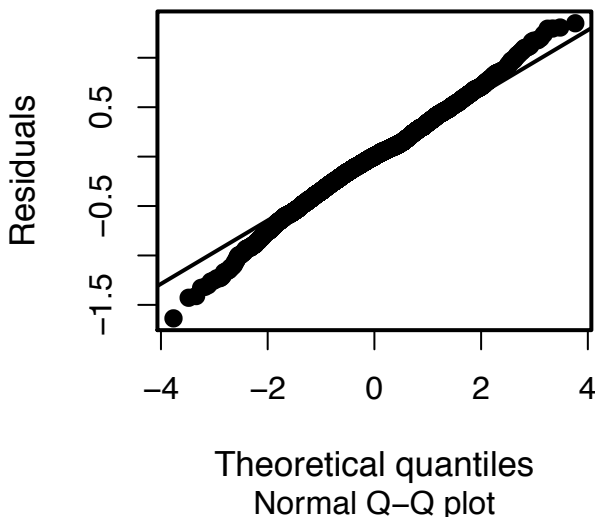

Scenario 6NB: isolation following divergence, with two migration rates: one since secondary contact,  $M_C$ , and one since the whaling era,  $M_W$

No whaling bottleneck

### Prior

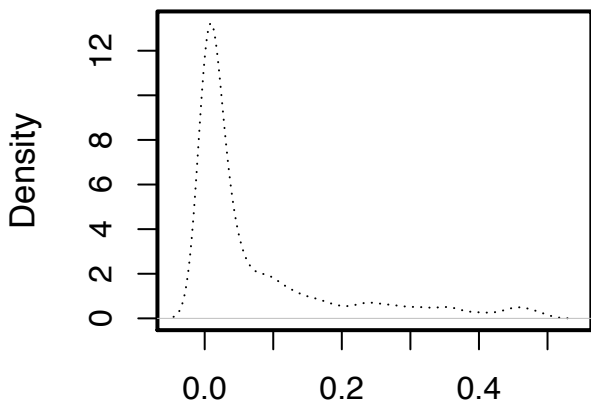

MIGR1\_2C

N = 1000 Bandwidth = 0.01549

### Euclidean distances

N(All / plotted) = 1e+05 / 1000

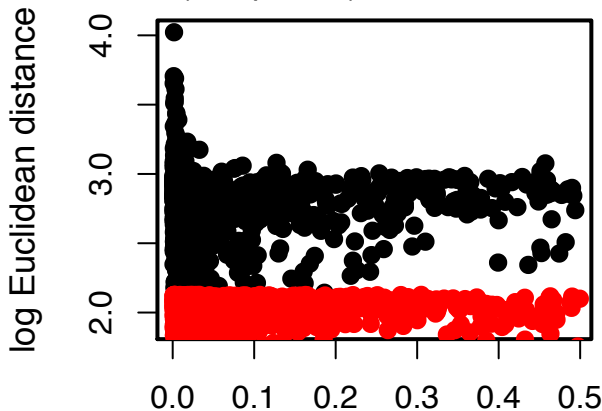

MIGR1\_2C

### Posterior with "neuralnet"

"rejection" and prior as reference

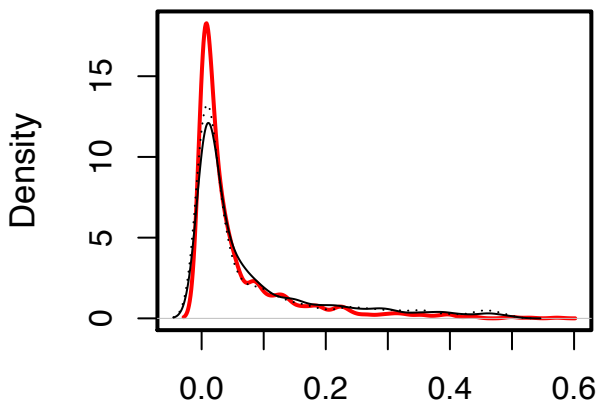

MIGR1\_2C

N = 1000 Bandwidth = 0.009817

### Residuals from nnet()

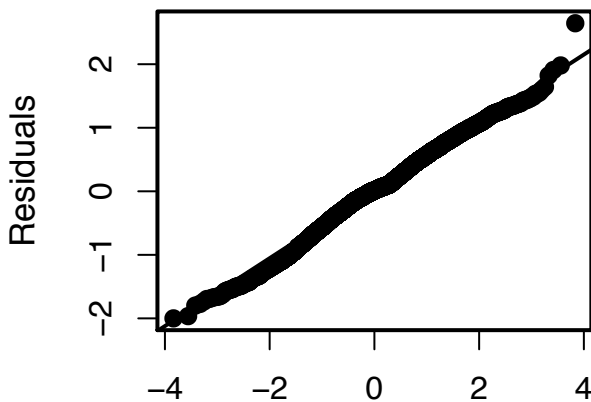

Theoretical quantiles

Normal Q-Q plot

### Prior

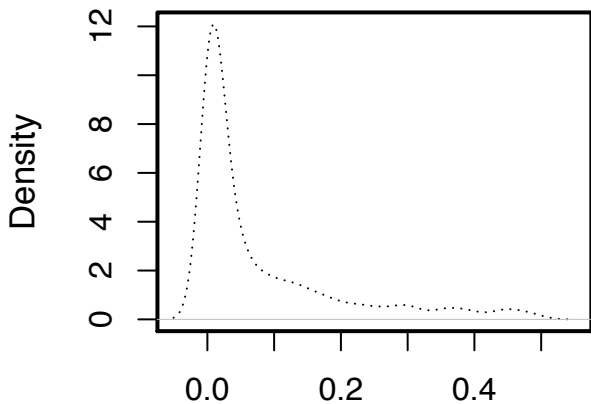

MIGR2\_1C

N = 1000 Bandwidth = 0.01725

### Euclidean distances

N(All / plotted) = 1e+05 / 1000

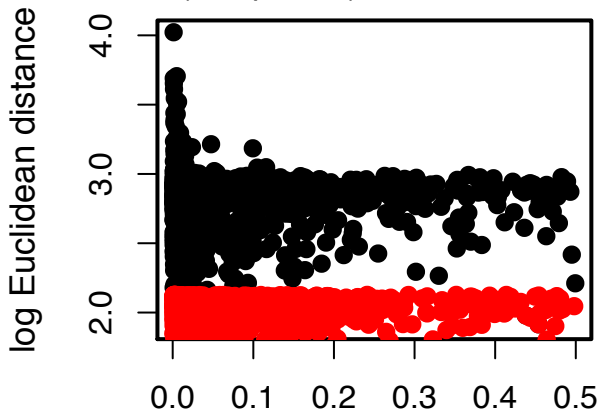

MIGR2\_1C

### Posterior with "neuralnet"

"rejection" and prior as reference

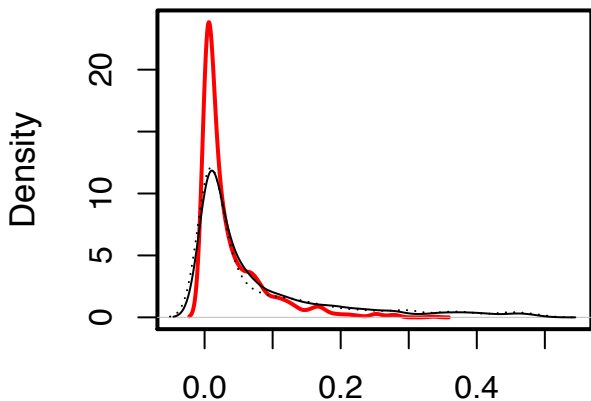

MIGR2\_1C

N = 1000 Bandwidth = 0.007576

### Residuals from nnet()

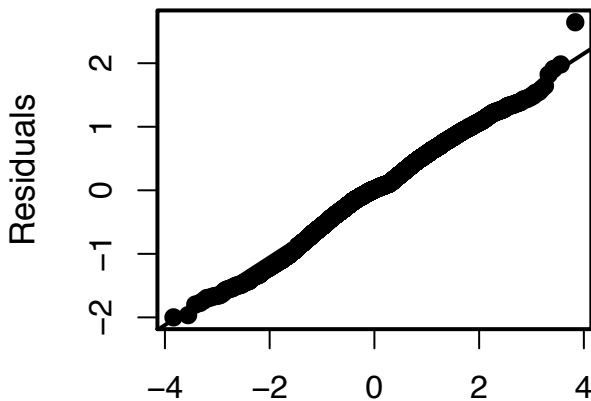

Theoretical quantiles

Normal Q-Q plot

### Prior

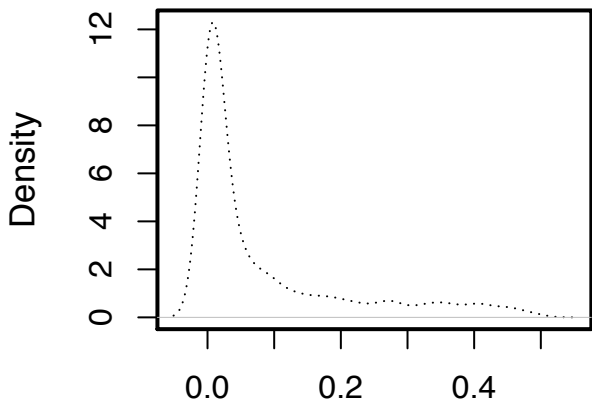

MIGR1\_2W

N = 1000 Bandwidth = 0.01734

### Euclidean distances

N(All / plotted) = 1e+05 / 1000

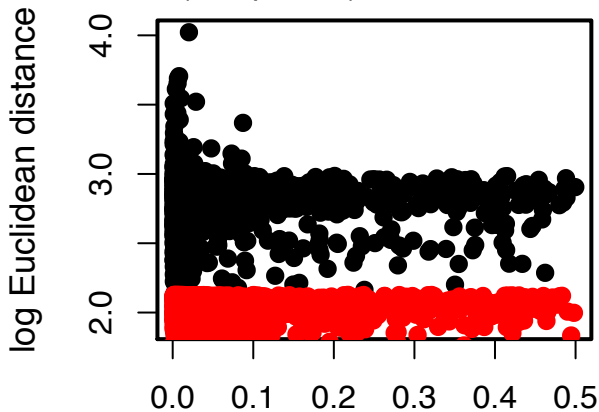

MIGR1\_2W

### Posterior with "neuralnet"

"rejection" and prior as reference

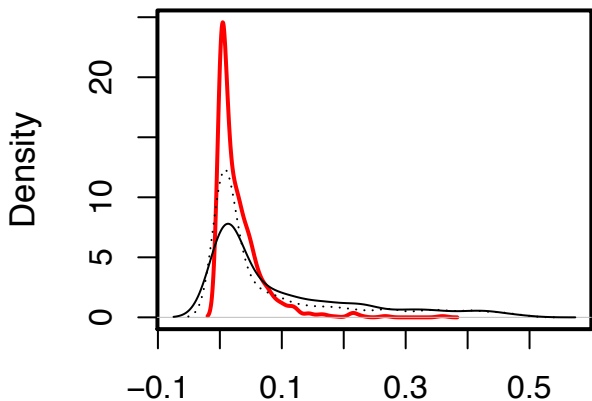

MIGR1\_2W

N = 1000 Bandwidth = 0.006676

### Residuals from nnet()

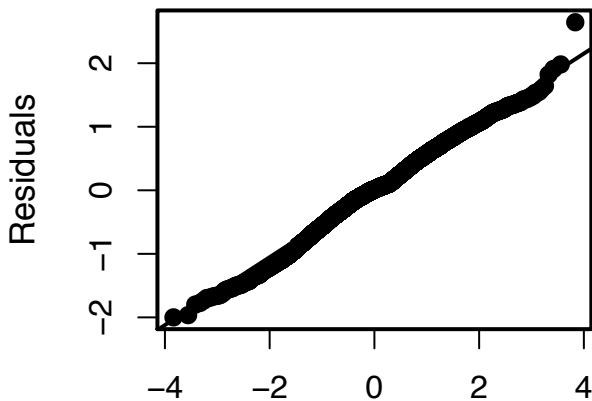

Theoretical quantiles

Normal Q-Q plot



### Prior

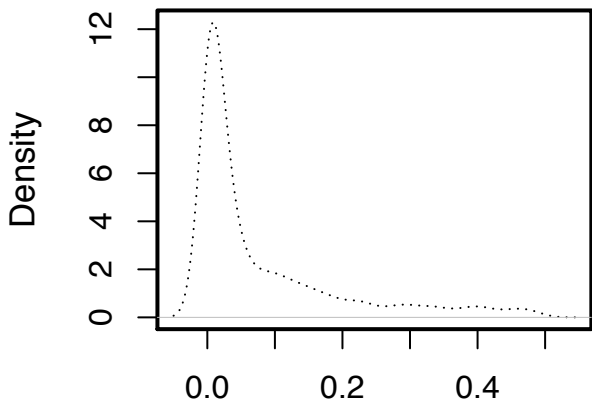

MIGR2\_1W

N = 1000 Bandwidth = 0.01703

### Euclidean distances

N(All / plotted) = 1e+05 / 1000

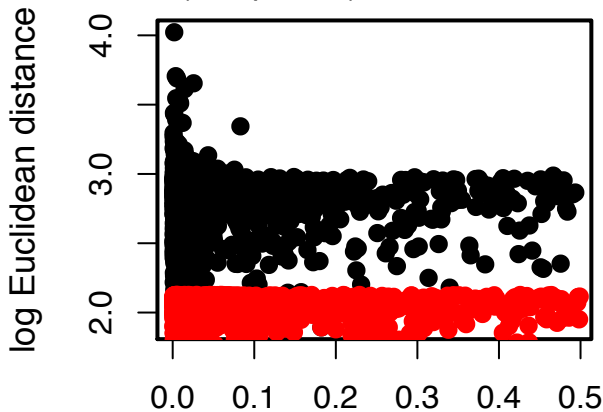

MIGR2\_1W

### Posterior with "neuralnet"

"rejection" and prior as reference

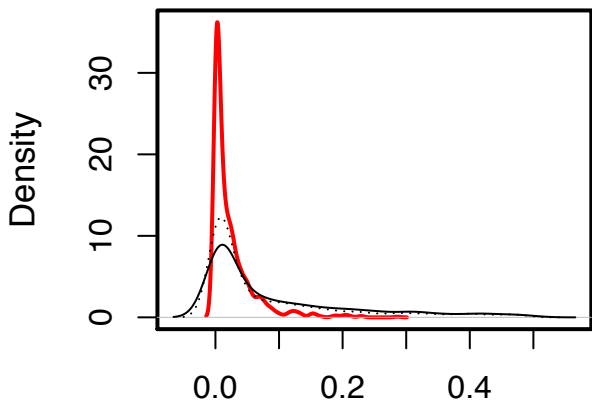

MIGR2\_1W

N = 1000 Bandwidth = 0.004876

### Residuals from nnet()



Theoretical quantiles

Normal Q-Q plot

### Prior

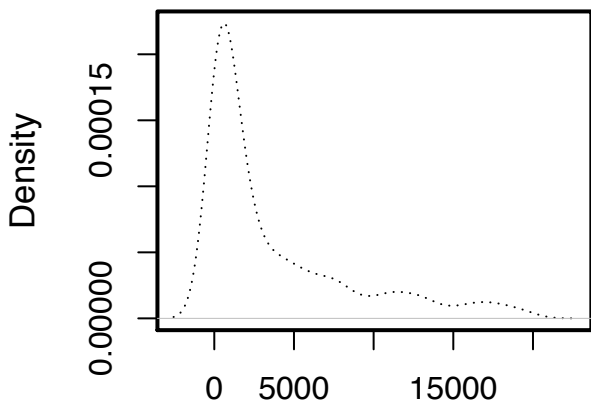

POP\_SIZE1MS

N = 1000 Bandwidth = 886.6

### Euclidean distances

N(All / plotted) = 1e+05 / 1000

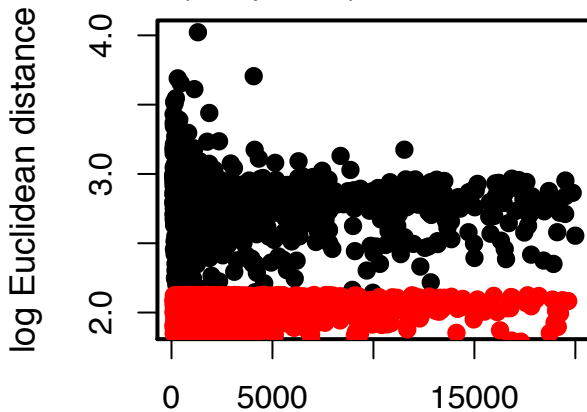

POP\_SIZE1MS

### Posterior with "neuralnet"

"rejection" and prior as reference

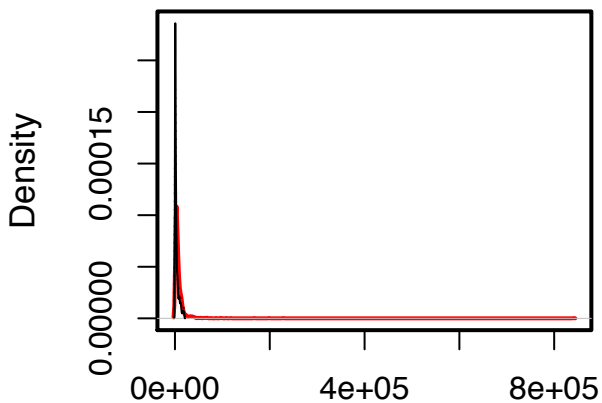

POP\_SIZE1MS

N = 1000 Bandwidth = 1067

### Residuals from nnet()

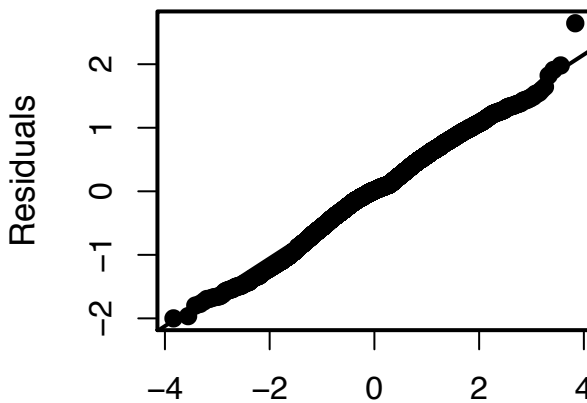

Theoretical quantiles

Normal Q-Q plot

### Prior

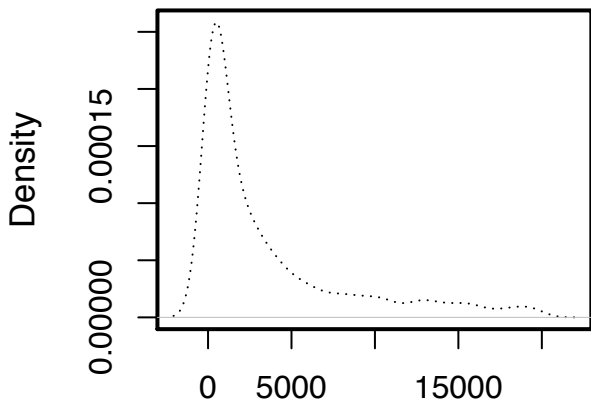

POP\_SIZE2MS

N = 1000 Bandwidth = 723.3

### Euclidean distances

N(All / plotted) = 1e+05 / 1000

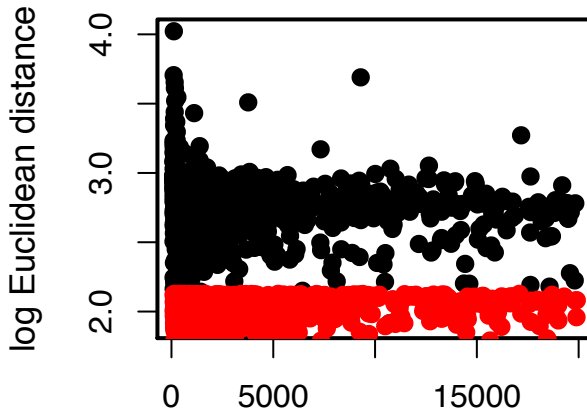

POP\_SIZE2MS

### Posterior with "neuralnet"

"rejection" and prior as reference

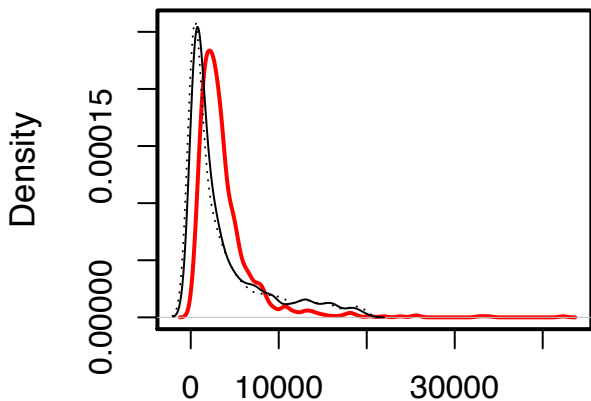

POP\_SIZE2MS

N = 1000 Bandwidth = 463.2

### Residuals from nnet()

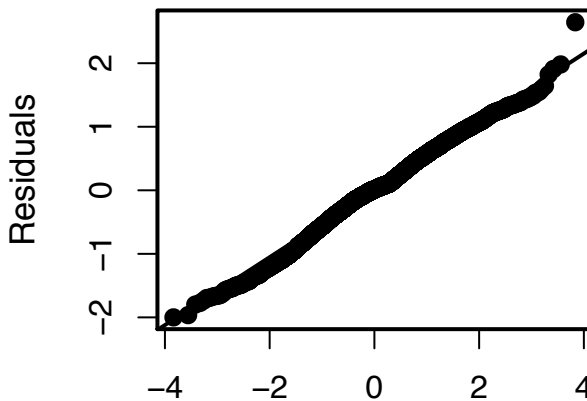

Theoretical quantiles

Normal Q-Q plot

### Prior

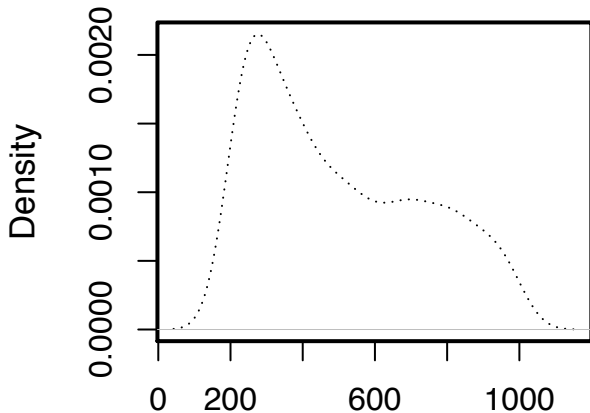

CONTACT

N = 1000 Bandwidth = 52.62

### Euclidean distances

N(All / plotted) = 1e+05 / 1000

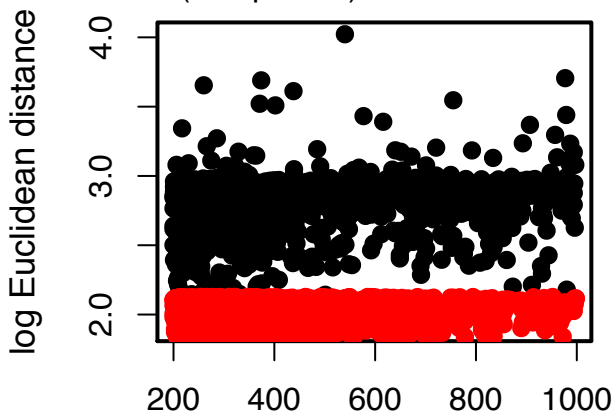

CONTACT

### Posterior with "neuralnet"

"rejection" and prior as reference

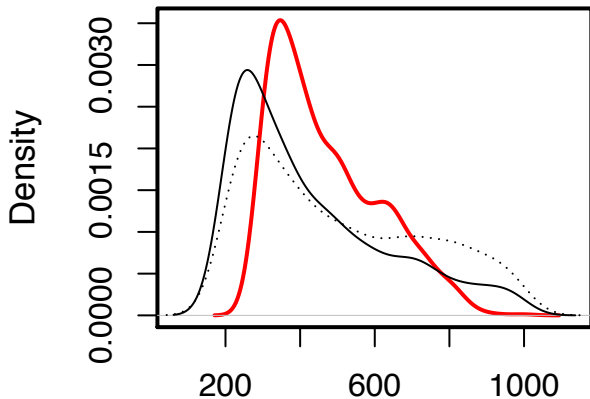

CONTACT

N = 1000 Bandwidth = 32.31

### Residuals from nnet()

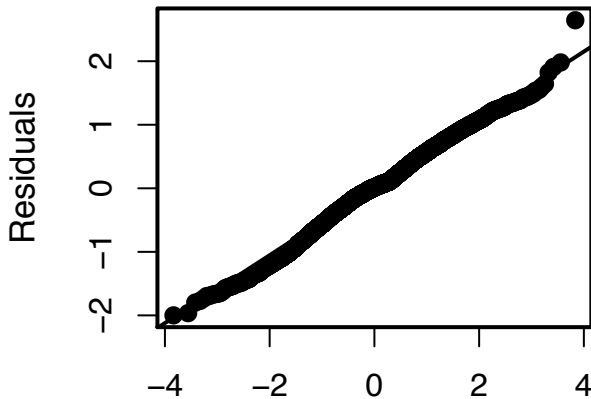

Theoretical quantiles

Normal Q-Q plot

### Prior

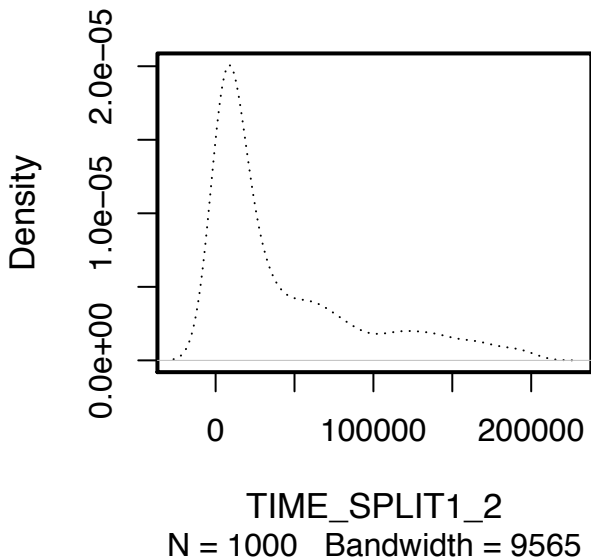

### Euclidean distances

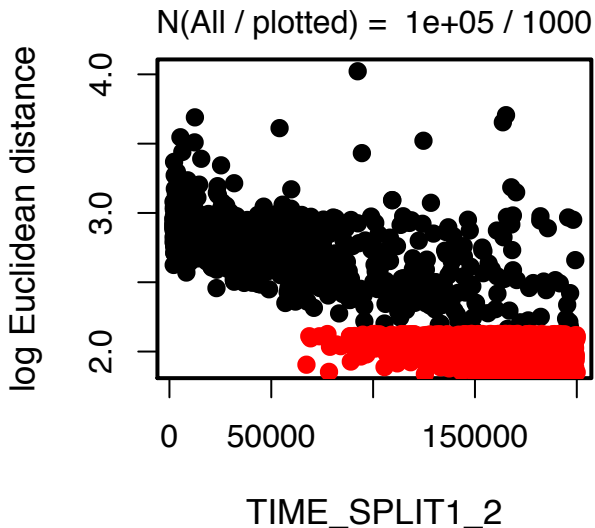

### Posterior with "neuralnet"

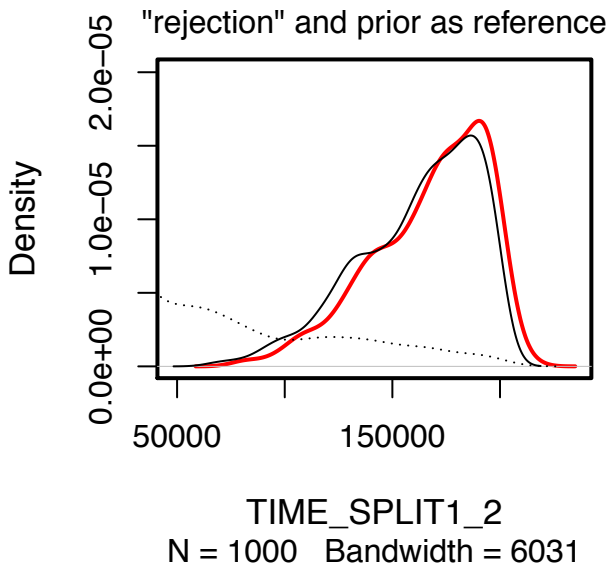

### Residuals from nnet()

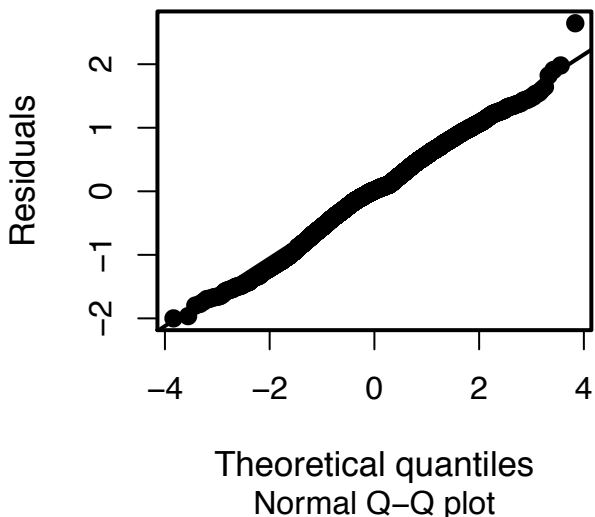

Supplement: 41437_2018_77_MOESM3_ESM.pdf [file 41437_2018_77_MOESM3_ESM.pdf]
